# A generative learning model for saccade adaptation

Carlos R. Cassanello<sup>1,2</sup>, Florian Ostendorf<sup>3</sup>, and Martin Rolfs<sup>1,2</sup>

<sup>1</sup>Department of Psychology, and <sup>2</sup>Bernstein Center for Computational Neuroscience  
Humboldt Universität zu Berlin, Philipstr. 13 Haus 6, 10115 Berlin, Germany

<sup>3</sup>Department of Neurology  
Charité – University Medicine Berlin, Augustenburger Platz 1, 13355 Berlin, Germany

*Running head:* Generative learning model for saccadic adaptation

*Key words:* visually-guided saccades, sensorimotor learning, oculomotor plasticity, parameter estimation

*Number of display items:* 9 Figures and 2 Tables

*Word count:* Abstract: 296; Summary: 168; Introduction: 751; Methods: 4293;  
Results: 4508; Discussion: 4921; Conclusions: 143

*Corresponding authors:*

Carlos R Cassanello ([cassanec@hu-berlin.de](mailto:cassanec@hu-berlin.de)) & Martin Rolfs ([martin.rolfs@hu-berlin.de](mailto:martin.rolfs@hu-berlin.de))

## 1 **Abstract**

2 Plasticity in the oculomotor system ensures that saccadic eye movements reliably meet their visual  
3 goals—to bring regions of interest into foveal, high-acuity vision. Here, we present a  
4 comprehensive description of sensorimotor learning in saccades. We induced continuous  
5 adaptation of saccade amplitudes using a double-step paradigm, in which participants saccade to  
6 a peripheral target stimulus, which then undergoes a surreptitious, intra-saccadic shift (ISS) as the  
7 eyes are in flight. In our experiments, the ISS followed a systematic variation, increasing or  
8 decreasing from one saccade to the next as a sinusoidal function of the trial number. Over a large  
9 range of frequencies, we confirm that adaptation gain shows (1) a periodic response, reflecting the  
10 frequency of the ISS with a delay of a number of trials, and (2) a simultaneous drift towards lower  
11 saccade gains. We then show that state-space-based linear time-invariant systems (LTIS)  
12 represent suitable generative models for this evolution of saccade gain over time. This *state-*  
13 *equation* algorithm computes the prediction of an internal (or hidden state-) variable by learning  
14 from recent feedback errors, and it can be compared to experimentally observed adaptation gain.  
15 The algorithm also includes a forgetting rate that quantifies per-trial leaks in the adaptation gain, as  
16 well as a systematic, non-error-based bias. Finally, we study how the parameters of the generative  
17 models depend on features of the ISS. Driven by a sinusoidal disturbance, the state-equation  
18 admits an exact analytical solution that expresses the parameters of the phenomenological  
19 description as functions of those of the generative model. Together with statistical model selection  
20 criteria, we use these correspondences to characterize and refine the structure of compatible state-  
21 equation models. We discuss the relation of these findings to established results and suggest that  
22 they may guide further design of experimental research across domains of sensorimotor  
23 adaptation.

## 24 **Author Summary**

25 Constant adjustments of saccade metrics maintain oculomotor accuracy under changing  
26 environments. This error-driven learning can be induced experimentally by manipulating the

27 targeting error of eye movements. Here, we investigate oculomotor learning in healthy participants  
28 in response to a sinusoidally evolving error. We then fit a class of generative models to the  
29 observed dynamics of oculomotor adaptation under this new learning regime. Formal model  
30 comparison suggests a richer model parameterization for such a sinusoidal error variation than  
31 proposed so far in the context of classical, step-like disturbances. We identify and fit the  
32 parameters of a generative model as underlying those of a phenomenological description of  
33 adaptation dynamics and provide an explicit link of this generative model to more established state  
34 equations for motor learning. The joint use of the sinusoidal adaption regime and consecutive  
35 model fit may provide a powerful approach to assess interindividual differences in adaptation  
36 across healthy individuals and to evaluate changes in learning dynamics in altered brain states,  
37 such as sustained by injuries, diseases, or aging.

## 38 Introduction

39 The accuracy of saccadic eye movement is maintained through mechanisms of saccade  
40 adaptation, which adjust the amplitude [1-3] or direction [4-6] of subsequent movements in  
41 response to targeting errors. As online visual feedback cannot be used to correct the ongoing  
42 movement, saccadic eye movements need to be preprogrammed and adaptation must largely rely  
43 on past experience and active predictions [7,8] rather than closed-loop sensory information.

44 To induce saccade adaptation in the laboratory [1], participants are instructed to follow a step of a  
45 target stimulus with their eyes and this visual cue is then displaced further during the saccade eye  
46 movement. Typically, this second, intra-saccadic step (ISS) is constant across trials and directed  
47 along the initial target vector towards smaller or larger saccade amplitudes. Although the ISS is  
48 visually imperceptible [9], saccades adjust their amplitude to compensate for the induced error. In  
49 phenomenological analyses of such saccade adaptation data, the amount of adaptation is usually  
50 quantified by comparing saccade gain values before and after the adapting block and interpolating  
51 an exponential fit in between [1-3,10].

52 We recently presented a version of this paradigm in which the ISS (the disturbance responsible for  
53 inducing adaptation) follows a sinusoidal variation as a function of trial number ([11,12]; see also  
54 [4,13,14]). We reported that gain changes were well described by a parametric functional form  
55 consisting of two additive components. One component was a *periodic response* reflecting the  
56 frequency of the ISS that was adequately fitted with a lagged but otherwise undistorted sinusoid.  
57 The second component constituted a *drift of the baseline* toward lower saccade gain (larger  
58 hypometria) that was appropriately accounted for using an exponential dependence.

59 Here, we investigate whether a generative algorithm that models saccade gain modifications on a  
60 trial-by-trial basis by learning from errors made on previous trials can account for this response. To  
61 this end, we implemented and fit a series of state-space models in which a modified delta-rule  
62 algorithm updates a hidden or latent variable (for which the experimentally observed adaptation  
63 gain is a proxy) by weighting the last experienced visual error, in addition to other error-based and  
64 non-error based learning components [8,15-23].

65 We adopt the approach that these algorithms are linear time-invariant systems (LTIS), in that their  
66 coefficients are time and trial-independent. LTIS models, also known as linear dynamical systems  
67 (LDS) have been successfully used in a number of motor adaptation studies [8,19-22,24-27].  
68 Applied to saccade adaptation, they may predict the dynamics of the saccade amplitude itself as  
69 well as various forms of movement gain typically used in describing adaptation [2,3,10,11]. Our first  
70 goal was to establish empirically whether LTIS models could fit the data recorded with a sinusoidal  
71 adaptation paradigm, as efficiently as when using a constant (fixed) ISS. Once we have  
72 established this point, we will explore the relation between the predicted phenomenological  
73 parameters [11,12] and the learning parameters of the underlying generative model, as well as  
74 their potential dependence on the perturbation dynamics.

75 We first analyze the ability of a family of generative models to describe experimental recordings of  
76 saccade adaptation by fitting the relevant learning parameters. We then perform statistical model-  
77 selection analysis to determine those that best fitted the same data in the various experimental  
78 conditions. We fitted models to two data sets, a previously published one [11] and a variation of  
79 that paradigm that extended the range of frequencies of the sinusoidal variation of the ISS. Both  
80 data sets contrasted two established saccadic adaptation protocols [11,12]: Two-way adaptation  
81 (i.e., bidirectional adaptation along the saccade vector of saccades executed along the horizontal  
82 meridian) and Global adaptation (i.e., adaptation along the saccade vector of saccades executed in  
83 random directions). We then explore consequences for current models of motor learning and  
84 suggest possible modifications that may be required to generate a suitable description of  
85 sensorimotor learning during sinusoidal saccadic adaptation. In conducting this selection, we  
86 confirm that a single learning parameter model (a state-equation with just an error-based learning  
87 term; cf. [19]) does not suffice to fit the data. We then demonstrate that including an extra term  
88 that weights the next-to-last trial's error provides a better fit for the Two-way type of adaptation.  
89 This learning rate has the intriguing feature that it has negative values for all frequencies,  
90 suggesting an active unlearning of the next-to-last trial's feedback error, close, but not equal in  
91 magnitude to the learning rate of the last trial's error. We discuss possible functional roles of these

92 processes for oculomotor adaptation in natural situations, where saccadic accuracy is expected to  
93 exhibit slow dynamic changes across time.

## 94 **Methods**

### 95 *Procedure*

96 We re-analyzed the data we recently collected using a fast-paced saccade adaptation paradigm  
97 with a sinusoidal disturbance. We had previously described these data by fitting a  
98 phenomenological model that we identified using statistical model selection. For details on the  
99 experimental procedures pertaining to this original data set (henceforth, ORIG) and to the selection  
100 of the functional form of this phenomenological model, please refer to our former communication  
101 [11].

102 We applied the same experimental procedure in collecting further data with an enhanced range of  
103 frequencies. In this case, thirteen participants ran two sessions with similar Two-way and Global  
104 adaptation protocols as used in previous reports [11,12]. In short, Two-way adaptation refers to  
105 bidirectional adaptation along the saccade vector of saccades executed along the horizontal  
106 meridian. In turn, Global adaptation refers to adaptation along the saccade vector of saccades  
107 executed in random directions.

108 In collecting this dataset (henceforth, *FREQ*), each session had 2370 trials divided in 11 blocks.  
109 Odd numbered blocks had 75 no-adaptation trials (zero ISS). The five even-numbered blocks  
110 consisted of 384 trials each with a sinusoidal disturbance similar to that used before but with  
111 frequencies of 1, 3, 6, 12 and 24 cycles per block (i.e., 384, 128, 64, 32, and 16 saccades per  
112 cycle, respectively). The order of adaptation blocks was randomly interleaved for each observer  
113 and type of adaptation. The program was paused after each adaptation block, giving participants  
114 some resting time, and we calibrated eye position routinely at the beginning of each non-adapting  
115 (odd-numbered) block. In each trial, the pre-saccadic target step was fixed at 8 degrees of visual  
116 angle (dva). The subsequent second step (ISS) then ranged between  $-25\%$  and  $+25\%$  of the first  
117 step, changing size according to a sine function of trial number.

118 The Ethics Committee of the German Society for Psychology (DGPs) approved our protocols. We  
119 obtained written informed consent from all participants prior to their inclusion in the study. The  
120 present study conformed to the Declaration of Helsinki (2008).

121 *Data analysis and phenomenological model*

122 *Modeling of the saccadic response.* In a double-step adaptation paradigm [1], after a fixation  
123 interval the fixation target  $FP(n)$  undergoes a first step to become the target of a saccade,  
124 displayed at the pre-saccadic location  $TP1(n)$ . Because the eyes might have been stationed at a  
125 location  $EP1(n)$  close to but different than  $FP(n)$ , we define the pre-saccadic target amplitude  
126  $preTP(n) = TP1(n) - EP1(n)$ , with origin at  $EP1(n)$  rather than  $FP(n)$  and keep this convention  
127 throughout the study.

128 The second step of the McLaughlin paradigm (i.e., the target displacement inducing a feedback  
129 error) then shifts the target during the saccade to a position  $TP2(n)$  (so that  $ISS(n) = TP2(n) -$   
130  $TP1(n)$ ). Therefore, the post-saccadic target amplitude (at or immediately after saccade landing) is  
131 given by the identity:  $postTP(n) = preTP(n) + ISS(n)$ . For convenience, we will define a *target*  
132 *gain*,  $t(n)$ , as the ratio of the post-saccadic target amplitude to the pre-saccadic one, as well as a  
133 *disturbance gain*,  $d(n)$ , as the ratio of the second to the first target steps, i.e., the ratio of the  $ISS$  to  
134 the saccade proxy:

$$135 \quad t(n) = \frac{postTP(n)}{preTP(n)} = 1 + \frac{ISS(n)}{preTP(n)} = 1 + d(n). \quad (1)$$

136 In the general case, there would be a constant and a variable component in the second target step,  
137  $ISS(n) = C + V(n)$ . In our sinusoidal adaptation paradigms,  $C = 0$  and  $V(n) = P \sin\left(\frac{2\pi f}{N}n\right)$  is a sine  
138 function of the trial number so that:

$$139 \quad t(n) = 1 + \frac{ISS(n)}{preTP(n)} = 1 + c + v(n) = 1 + p(n) \cdot \sin\left(\frac{2\pi f}{N}n\right), \quad (2)$$

140 where  $c$  and  $v(n)$  are the ratios of the constant and variable part of the  $ISS$  to the pre-saccadic  
141 target amplitude. In the sinusoidal paradigms,  $f$  is the frequency of the sinusoid in cycles per  
142 block,  $N$  is the number of trials in an adaptation block, and  $n$  is the index of the current trial. At

143 fixed amplitude, the dynamics of the disturbance is fully determined by its angular frequency  
144  $\omega = \frac{2\pi f}{N}$ , that characterizes the rate of change of the sinusoid in each trial.  $P$  is the maximum  
145 absolute magnitude of the variable part  $V(n)$ , i.e., the 'amplitude' of the sinusoid that defines the  
146  $ISS$ . It was fixed at 2 dva throughout all sinusoidal adaptation datasets. Therefore,  $ISS(n)$  changed  
147 in magnitude periodically and in a sinusoidal fashion between approximately  $-25\%$  and  $+25\%$  of  
148 the magnitude of the pre-saccadic target eccentricity ( $preTP(n)$ ), which was held approximately  
149 fixed at 8 dva in all datasets. Finally,  $p(n)$  is the ratio of  $P$  and  $preTP(n)$ , and had an approximately  
150 constant value of 0.25 across the sinusoidal datasets (the slight dependence on the trial number  
151 was a consequence of the slight dependence of the normalizing factor  $preTP(n)$  on the trial  
152 number; in actuality, the magnitude held constant at 8 dva across the experiment was  $TP1(n) -$   
153  $FP(n)$ , which differed slightly but not systematically from  $TP1(n) - EP1(n)$ ). Given that we used  
154 integer number of cycles across all sinusoidal adaptation experiments, we expressed the  
155 frequency in cycles per block (cpb). We set the initial phase to zero, which means that the  
156 magnitude of the  $ISS$  starts at zero in the direction of positive  $ISS$  (outward second-steps of the  
157 saccade target) first. **Equation 2** provides a complete description of the stimulus that we used. Yet,  
158 for the analyses pursued here and to make closer contact with our phenomenological  
159 characterization of oculomotor responses in sinusoidal adaptation [11], we will further define a  
160 *stimulus gain*,  $s(n)$ , to be the disturbance gain normalized to (i.e., divided by) its maximum  
161 absolute value. Therefore,  $s(n)$  would range within  $\pm 1$  in units of its maximum amplitude following  
162 a sinusoidal variation with trial number:

$$163 \quad s(n) = \left| \frac{preTP(n)}{\|ISS\|} \right| \left( \frac{postTP(n)}{preTP(n)} - 1 \right) = \frac{ISS(n)}{\|ISS\|} = \frac{1}{\|d\|} d(n) = \sin\left(\frac{2\pi f}{N} n\right). \quad (3)$$

164 Saccade amplitude adaptation is usually described in terms of the changes in *saccade gain*  
165 ( $SG(n)$ ), defined as the ratio of the saccade amplitude ( $SA(n)$ ) to the pre-saccadic position error  
166 ( $preTP(n)$ ). During non-adapting trials and at the beginning of the adaptation blocks,  $SG(n)$  is  
167 typically slightly smaller than 1, which means that the saccade undershoots the target. Since we  
168 are interested in keeping track of the excursions of the saccade gain with respect to a perfect



169 completion of the saccade that matches  $preTP(n)$  exactly, we shall define an *adaptation gain*  
170 subtracting one from the usual saccade gain and normalized to the maximum absolute value of the  
171  $ISS$ ,

$$172 \quad g(n) = \frac{preTP(n)}{\|ISS\|} (SG(n) - 1) = \frac{SA(n) - preTP(n)}{\|ISS\|}. \quad (3a)$$

173 The adaptation gain represents the residual of the saccade gain with respect to perfect landing.  
174 When a saccade lands exactly on the first target step (a perfectly accurate saccade), the saccade  
175 gain will be one while the adaptation gain will be zero. Therefore, the adaptation gain uses perfect  
176 landing as the origin of coordinates and quantifies departures from this ideal goal state. Clearly, in  
177 both descriptions the reference represents a state of no adaptation. The adaptation gain  
178 description may be viewed as following the evolution of the error rather than that of the full eye  
179 movement. As long as the true underlying learning model is strictly linear, both descriptions must  
180 be equivalent since they relate to each other by a shift. We used the adaptation gain,  $g(n)$ , in our  
181 previous reports [11,12] to provide phenomenological parametric description of sinusoidal  
182 adaptation data and it is also commonly used within motor control research. Throughout the  
183 manuscript we shall use  $SG(n)$  or  $g(n)$  as the relevant behavioral variables describing the data,  
184 which are computed directly from the experimental measurements of the eye and target positions  
185 in each trial.

186 *Assessment of the evidence in favor of a model.* In implementing the phenomenological parameter  
187 estimation, we adopted a Gaussian likelihood for the data given the model. This likelihood can be  
188 maximized with respect to the parameters at a fixed but unknown width. Instead we adopted the  
189 following procedure [11,13]. Using Bayes theorem, priors for the parameters to be estimated, and  
190 assuming a constant prior probability for the data, we can obtain a joint probability amplitude for all  
191 parameters that can be marginalized to extract individual probability amplitudes for each  
192 parameter. In this process, the width of the Gaussian likelihood is a nuisance parameter that we  
193 integrate out using a non-informative prior [13,28,29]. Once such integration is conducted, the  
194 volume of the resulting probability density (given the data) provides an estimate of the odds that  
195 the model would provide a reasonable description of the data. Here we provide a full model

196 consisting of six parameters (sinusoidal entraining of the oculomotor response riding over a  
197 baseline drift) that we want to compare to a partial model (the drift of the baseline alone) and to a  
198 minimal model consisting of the mean of the adapting block with variance equal to the variance of  
199 the recorded data over that block. To establish which situation is more likely across different  
200 number of parameters, we take the log of the ratio of the odds across the models. The resulting  
201 magnitude is the *evidence* that the data are in favor of a particular model and is measured in  
202 *decibels* (db). When this magnitude is positive, the odds favor the model in the numerator, with  
203 evidence higher than 3 db indicating that this model is significantly favored to the one in the  
204 denominator. We use this metric to assess the quality of our parameter estimation.

205 *Statistics.* Throughout the manuscript we report results as mean  $\pm$  SD for individual data and  
206 mean  $\pm$  SEM when we discuss group data. In the phenomenological fittings, to determine average  
207 parameters from the parameter estimation other than the frequency, we computed the mean and  
208 variance for each parameter and participant as the first two moments of the corresponding  
209 posterior probability distribution and took the average of the means weighted by their standard  
210 deviations (square root of the estimated variance) to generate each point on the population plot.  
211 Alternative estimators (e.g., the modes of the posterior distributions, with and without weighting)  
212 gave qualitatively similar results.

213 *Modeling of the sensorimotor learning process: the modified delta-rule state equation.*

214 To investigate generative models, we adopt the following rationale. In each trial, the oculomotor  
215 system must generate a motor command to produce the impending saccade. This needs to be  
216 calibrated against the actual physical size of the required movement [15,20,22,24,30,31].

217 If the saccade fails to land on target, the motor command needs to be recalibrated based on  
218 preexisting calibrations, and we will hypothesize that those changes take place in an obligatory  
219 manner (cf. [19] ) through additive, error-based modifications attempting to ameliorate post-  
220 saccadic mismatches between the eyes' landing position and target location.

221 We model the underlying sensorimotor learning using linear time-invariant systems (LTIS) because  
222 the model parameters (or the learning coefficients) are time independent in each experimental  
223 block, although they can vary across experimental conditions or phases [32]. These models are  
224 closely related to linear dynamical systems (LDS; cf. [20-22]), except that here we only address  
225 noise-free models.

226 Because saccades are extremely rapid movements that do not admit reprogramming in mid-flight,  
227 it is assumed that all gain changes take place in between saccades. In our models, therefore, the  
228 error-based correction terms weight errors that were experienced in previous saccades. As a  
229 consequence, in the estimation of the forthcoming event, the post-saccadic stimulus gain is not  
230 compared against the adaptation gain measured for that trial but against the previous estimate of  
231 the gain. To justify these assumptions, it is usually assumed that the motor system sends an  
232 *efference copy* of the motor command to the sensory areas, which enables prediction of the  
233 sensory consequences of the movement and therefore avails comparison to experienced post-  
234 saccadic feedback [7,19,20,31,33-35].

235 We will assume that the values of saccade and adaptation gains observed and extracted from the  
236 recorded data (i.e.,  $SG(n) = \frac{SA(n)}{preTP(n)}$  and  $g(n) = \frac{SA(n) - preTP(n)}{\|ISS\|}$ ) are adequate proxies of that motor  
237 calibration process. Yet the calibration itself is an internal feature of the brain and therefore the  
238 *adaptation gain* that enters the generative algorithm (the state-equation) that we intend to study is  
239 a *hidden variable* representing the *internal state* of the system. A model providing its temporal  
240 evolution can then be fitted to the data; yet the variable itself is not experimentally accessible. We  
241 denote the internal variable associated to the saccade gain by  $z(n)$ . To describe the evolution of  
242 this *state* variable we introduce the state-equation:

$$z(n+1) = A \cdot z(n) + K \cdot (t(n) - z(n)) + M + D \\ \cdot (t(n-1) - z(n-1)), \quad (4)$$

243 supplemented with an initial condition that sets the initial value  $z(1) = G \cdot t(1)$ . Here, the target  
244 gain  $t(n)$  is available from recordings in each trial and we shall assess how well the *prediction* of

245 the saccade gain  $(z(n + 1))$ , provided by **Equation 4** fits the recorded data  $SG(n)$ . The first term on  
246 the RHS of the equation is a persistence term. The persistence rate  $A$  determines how much of the  
247 estimate of the state variable at trial  $n$  is transferred to the estimate at the next trial [8,25,36].  
248 Therefore, its magnitude is expected to be typically slightly smaller than 1 and it is set to be 1 in the  
249 models that do not include its effect. The second term weights the discrepancy between the gain of  
250 the target at trial  $n$  and the predicted gain of the movement under the underlying assumption that  
251 the size of the state variable is an adequate proxy for the (sensory) consequences of the  
252 movement. The weighting coefficient  $K$  is called *learning rate*.  $M$  embodies any systematic effect  
253 (drift or bias) that takes place in each trial but is not directly determined by the sensory feedback  
254 [37]; we shall call it a drift parameter. The last term is a second error-based correction term that  
255 weights the discrepancy between the gain of the target and the estimate of the movement at a trial  
256 other than the last error with an additional (distal) learning rate  $D$ . For concreteness we shall  
257 assume that this correction is based on the sensory feedback arising from the next-to-last trial.  
258 However, we shall return to this specific assumption further in the **Discussion**. Note that with the  
259 inclusion of this hypothetical double error sampling the full model of **Equation 4** (and **Equation 5**  
260 below) becomes an algorithm that coherently uses two delayed feedbacks to estimate the state of  
261 a single internal variable that models the sensory consequences of the intended motion.

262 *Formatting of the data for fittings of the learning model.* To be able to consistently compare results  
263 from this manuscript with the phenomenological analyses of the data presented in our earlier  
264 report, we will write the generative model in terms of a state variable associated to the *adaptation*  
265 *gain* of **Equation 3a** (cf. [11], and therefore naturally defined as  $x(n) = \frac{1}{p}(z(n) - 1)$ ). Applying  
266 these changes, we obtain:

$$x(n + 1) = A \cdot x(n) + K \cdot (s(n) - x(n)) + m + D \cdot (s(n - 1) - x(n - 1)). \quad (5)$$

267 As suggested by **Equations 4** and **5**, a sensorimotor learning model can be written in terms of  
268 hidden variables that would be naturally associated with the saccade gain or the adaptation gain  
269 defined in **Equations 3** and **3a** respectively. When transitioning from the saccade gain to the  
270 adaptation gain description in this linear model, the only parameter of **Equation 4** susceptible to

271 changes is  $M$ , which we indicated in **Equation 5** using the lower-case  $m$  instead. Throughout the  
272 manuscript we adopt the adaptation gain (defined above), as the state variable to characterize the  
273 internal model and **Equation 5** as its relevant state-equation. In this description, the stimulus gain  
274 reduces to a pure sinusoidal disturbance with zero mean (i.e., with no static component), which  
275 minimizes confounds between the effects of the retention rate  $A$  and the drift parameter  $m$ .

276 Because movement gains are computed from experimental observations, models of motor control  
277 often include a second equation that maps the estimates of the hypothesized internal variable to  
278 real-world observations (see, e.g., [20,21]). In our simplified analyses and again invoking the pre-  
279 programmed nature and accuracy of saccades, we set this second (observation) stage to be an  
280 identity.

281 *Estimation of the learning parameters, model classification and model selection.*

282 We conducted our analyses using the full form of **Equation 5**. We were interested in determining  
283 which model suffices to account for the data with the least number of parameters. The magnitude  
284 being learned is  $x$ , the internal representation of the adaptation gain of the imminent saccade. This  
285 gain has value zero upon the ideal outcome of perfect movement accuracy and in that respect, it  
286 can be interpreted as the gain of an internal prediction error. Using **Equation 5**, we generated the  
287 predicted values of  $x(n)$  in each condition and for each participant, and then fitted a number of  
288 models that differed from each other in which parameters were estimated. When a parameter  
289 among  $K$ ,  $m$ , or  $D$  was not present, the corresponding term was removed from **Equation 5**. Note  
290 however, that when the parameter  $A$  was not included as a fitting parameter, its value was set to  
291 unity (i.e.,  $A = 1$ ). In the case of the initial value  $G$ , we obtained an estimate by taking the average  
292 of the first five values of the gain. We proceeded in this way because the initial value of the state of  
293 the system is unknown and, while the first recorded value of the gain could be considered a proxy  
294 for such initial state, execution and motor errors could yield a value of the gain significantly  
295 different than the actual initial state of the system; we averaged over 5 trials to alleviate this  
296 problem. In models where the initial value of the gain was left free to become a fitting parameter,  
297 this average over the first five saccades was used as an initial value for the fitting routine for that

298 particular parameter. Improvements can be achieved by letting the initial condition become an  
299 extra parameter. We discuss below the interpretation of using the initial condition as a fitting  
300 parameter of the model.

301 In view of these features of the generative model, a natural classification of the models tested  
302 arises as follows: given the parameters  $K, A, m, D_1, \dots, D_w, G$ , we will 1) include  $K$  in every model  
303 because we are modeling intrinsic learning where we assume that learning from the last  
304 experienced feedback is always present as well as obligatory [19,20,22,31]; 2) models will be  
305 generated by adding successively the parameters  $A, m$ , and  $D$ , of which one or more could be  
306 present but in this study we restrict ourselves to learning possibly from only one extra feedback in  
307 the past; 3)  $G$  is an optional parameter that is included in an attempt to alleviate extreme effects of  
308 the initial condition(s) as explained above. By applying points 1) through 3), sixteen different  
309 models can be generated. For reasons to become clear below we would group them in four  
310 families according to whether or not they contain the bias term ( $m$ ) and the additional error term  
311 (with learning rate  $D$ ):  $K$  only (although with  $A = 1$  when omitted),  $KA, KG, KAG$  feature zero bias  
312 and a single error term;  $Km, KAm, KmG, KAmG$  are models with a single error term that allow bias;  
313  $KD, KAD, KDG, KADG$  have no bias term but sample two errors, and  $KmD, KAmD, KmDG,$   
314  $KAmDG$  feature both a bias term and learn based on double error sampling. Therefore, the  
315 simplest model had a single fitting parameter (the learning rate  $K$ , cf. [19]) and was obtained by  
316 setting  $A = 1$ , removing the terms that involved  $m$  and  $D$ , and setting the initial value  $G$  to be the  
317 mean of the first five values of the gain in the block. The full model had all five as fitting  
318 parameters.

319 All parameters of the generative models were estimated by fitting the model to the experimental  
320 data using MATLAB function `nlinfit`; 95% parameters confidence intervals were computed using  
321 MATLAB function `nlparci` and predicted response for the hidden variable  $x$  with its corresponding  
322 95% confidence intervals were obtained from MATLAB function `nlpredci`.

323 All 16 models were fitted to each individual participants' data, parameters were extracted for each  
324 model, and models were compared using the Akaike information criterion (AIC; [38-41]) by

325 computing Akaike weights across models for each participant. Finally, these weights were  
326 averaged across participants for each model in each condition.

327 *Using the generative model to predict the parameters of the phenomenological description of the*  
328 *adaptation gain*

329 The adaptation gain of the oculomotor response to a sinusoidal disturbance is best described by a  
330 phenomenological function consisting of a decaying exponential added to a lagged but otherwise  
331 undistorted sinusoid [11]. The sinusoidal component of the response onsets at the beginning of the  
332 adaptation block but all fittings include the pre-adaptation block as well. The frequency of the  
333 stimulus disturbance is matched closely by the gain. To fully describe the response, five extra  
334 phenomenological parameters are required: amplitude ( $a$ ) and lag ( $\phi$ ) of the periodic part of the  
335 error gain complete the description of the periodic part. The exponential decaying component that  
336 describes the baseline on which the periodic response rides requires other three: an asymptotic  
337 value ( $B_0$ ) where the baseline stabilizes at large trial number, a timescale ( $\lambda$ ) in which the baseline  
338 reaches  $1/e$  of the full decay, and the amplitude of the decay ( $B$ ):

$$g(n) = a \cdot \sin(\omega n - \phi) + B e^{-\lambda n} + B_0, \quad \text{with} \quad \omega = \frac{2\pi v}{N}. \quad (8)$$

339 We use here the same denominations used in our previous report [11], except for changing the  
340 name of the timescale to  $\lambda$  to prevent confusion with the amplitude of the periodic component  $a$ . To  
341 estimate parameters of the phenomenological functional form that best fits the data we used the  
342 same general procedure and parameter estimation algorithm implemented in our earlier  
343 contributions [11,13]. Solving the state-equation via iteration in the simpler case where the system  
344 learns only from the last experienced feedback (cf. **S1 Appendix**), or borrowing techniques from  
345 the theory of LTIS reveals a correspondence between these phenomenological parameters and  
346 the coefficients of the generative model of **Equation 5**. (A complete derivation of the  
347 phenomenological parameters as functions of the generative ones is not presented here due to  
348 space limitations; details about the analytical procedures adopted can be found in [42]). Depending  
349 on the parameters that each generative model includes, the functional form and value of the

350 phenomenological coefficients may change. Here we are interested in assessing which theoretical  
 351 prediction of the relation among phenomenological and generative model parameters matches the  
 352 data best as a way to validate the underlying sensorimotor learning algorithm.

353 *Lag and amplitude of the periodic response*

354 The lag of the periodic response of the error gain derived from the (full version of the) generative  
 355 model of **Equation 5** including the next-to-last feedback-error term is given by:

$$\begin{aligned}\cos(\phi) &= \frac{\cos \omega - (A - K - D \cos \omega)}{\sqrt{[\cos \omega - (A - K - D \cos \omega)]^2 + [(1 - D) \sin \omega]^2}} \\ \sin(\phi) &= \frac{(1 - D) \sin \omega}{\sqrt{[\cos \omega - (A - K - D \cos \omega)]^2 + [(1 - D) \sin \omega]^2}}.\end{aligned}\quad (9)$$

356 In models without next-to-last feedback term  $D$  should be set to zero; in models that do not have  $A$   
 357 as a fitting parameter, its value should be set to 1 in **Equation 9**.

358 The periodic component of the response to a sinusoidal disturbance in models where the next-to-  
 359 last feedback is included can be written as:

$$h(n) = \frac{K}{R} \sin(\omega n - \phi) + \frac{D}{R} \sin(\omega(n - 1) - \phi), \quad (10)$$

360 where  $R = \sqrt{[\cos \omega - (A - K - D \cos \omega)]^2 + [(1 - D) \sin \omega]^2}$ .

361 **Equation 10** shows that if  $D = 0$  we recover the solution expected by iteration when there is  
 362 learning from the last error only. Then the amplitude of the periodic component ( $a$ ) in **Equation 8**  
 363 can be read out directly to be  $a = \frac{K}{R}$ . When  $D \neq 0$  we need to re-write **Equation 10** so that it  
 364 matches the periodic part of **Equation 8**. After some algebra **Equation 10** can be recast as:

$$h(n) = \frac{Q}{R} \cdot \sin(\omega n - (\phi + \varphi)) \quad (11)$$

365 where

$$Q = \sqrt{(K + D \cos \omega)^2 + (D \sin \omega)^2}, \quad \cos \varphi = \frac{K + D \cos \omega}{Q}, \quad \sin \varphi = \frac{D \sin \omega}{Q}. \quad (12)$$



366 **Equations 9 to 12** clarify the effect of the presence of the next-to-last error learning rate  $D$ .

367 **Equation 9** shows how the *bare* lag  $\phi$  changes when  $D$  is present. Yet, it would be incorrect to

368 compare the fitted values of the phenomenological lag to **Equation 9**. The reason is that the

369 second contribution in **Equation 10** modifies not only the amplitude of the periodic component to

370 the new value  $a = \frac{Q}{R}$ , but it also adds the shift  $\varphi$  to the lag. Therefore, if there were also learning

371 from the next-to-last error, the observed (behavioral) lag should be compared to  $\phi + \varphi$ .

372 *Baseline drift parameters*

373 Following a sinusoidal disturbance, the baseline of the error gain will approach an asymptote at

374 large trial number that can be written as a function of parameters of **Equation 5** as (see also **S1**

375 **Appendix**):

$$B_0 = \frac{m}{1 - (A - (K + D))} \quad (13)$$

376 The timescale  $\lambda$  for the decay of the baseline, has units of 1/trials and it is defined by:

$$e^{-\lambda} = \frac{1}{2} \left\{ (A - K) \pm [(A - K)^2 - 4D]^{\frac{1}{2}} \right\} \quad (14)$$

377 **Equation 14** provides the weights of the *impulse response* that generates the integral solution by

378 convolving the stimulus (i.e.,  $s(n)$ ; cf. **S1 Appendix**, [42]). The inverse of the timescale parameter

379  $\lambda$  gives the number of trials over which the stimulus is integrated. Beyond this *window of*

380 *integration*, the weighting of the stimulus would have reduced enough to ignore further

381 contributions. When  $D = 0$ , the integration weight becomes  $e^{-\lambda} = (A - K)$ , which is positive and

382 smaller than 1, provided that the learning rate  $K < 1$  and  $A \sim 1$ . When  $D \neq 0$ , **Equation 14** provides

383 timescales for two modes that compose the integral solution of the state-equation. These result

384 from the addition or subtraction of the second term in braces. If the parameter  $D$  is negative, the

385 second term inside the braces becomes slightly larger than the first. The timescale resulting from

386 the addition is positive and can be expressed as a decaying exponential. The subtraction solution

387 is negative and of small magnitude and, therefore, it will decay much faster when raised to the trial

388 number. It introduces small additive fluctuations to the exponential decay of the addition solution

389 without changing its overall behavior. Critically, diverse sizes of the learning parameters may result  
390 in smaller or larger timescales in models with  $D \neq 0$  compared to models where  $D = 0$  (cf. **Results**  
391 section and **S1 Appendix**).

392 To recap, **Equation 8** has four phenomenological parameters that we shall explore in further detail:  
393  $B_0$ ,  $\lambda$ ,  $a$ , and  $\phi$ . The former two parameters are already familiar from phenomenological  
394 descriptions of data in paradigms using fixed-sized second-step for the target. The latter are new,  
395 arising in paradigms with sinusoidal disturbances.

396 The amplitude of the decay of the baseline also bears dependence on the learning rates as well as  
397 on the initial condition. Because of the strong influence of the initial condition on this parameter, we  
398 refrain from a comparison of the behavioral fittings to the predictions from the generative model for  
399 this case.

400 Part of the material discussed in this contribution have been presented in the form of posters or  
401 slide presentations [43,44].

## 402 **Results**

### 403 *Analysis of the data at the phenomenological level*

404 To obtain a general idea of patterns present in the data, we first collapsed the data for each  
405 stimulus frequency and adaptation type across participants (group data). We fit these data using a  
406 piecewise continuous function given by the addition of a monotonic (exponential) decay of the  
407 baseline –spanning both pre-adaptation and adapting trials- and a periodic entraining of the  
408 oculomotor response to the sinusoidal stimulus that begins at the onset of the adaptation block.  
409 This choice was supported by the fact that we had confirmed using statistical model selection  
410 criteria (i.e., AIC and BIC, [38-41,45]) that this functional dependence was the best descriptor of  
411 the oculomotor response among the set of models tested in Cassanello et al. [11]. For illustration  
412 purposes only, **Fig 1** shows the group data in each dataset, along with the fits resulting from the  
413 parameter estimation based on the phenomenological model of **Equation 8**. The same

414 parameterization was used to fit each participant's run. **Figs 2 and 3** summarize the estimation of  
415 the phenomenological parameters entering **Equation 8**. **Fig 2** shows the values of mean  $\pm$  SEM of  
416 the parameters estimated from every individual dataset for each frequency and adaptation type.

417 **Fig 1. Fits of the phenomenological model to the experimental data.** The plots show adaptation gain (colored lines)  
418 averaged over individuals in the (a) Two-way adaptation and (b) Global adaptation condition of the ORIG data set  
419 (reported in [11]), as well as the (c) Two-way adaptation and (d) Global adaptation condition of the FREQ data set, using  
420 the same paradigm over an extended range of frequencies. The fit (black line) is based on **Equation 8**. The same  
421 equation was fitted to data from each participant in each condition and experiment, to estimate phenomenological  
422 parameters on an individual bases. For illustration purposes only, the figure depicts fittings done over the averages along  
423 with 95% confidence intervals (gray shaded areas). The black dotted lines indicate the time evolution of the baseline if  
424 the amplitude of the periodic response were zero, corresponding to a drift only model. The solid black lines indicate the  
425 approximate middle-point locations of the periodic component.

426 **Fig 2.** Phenomenological parameters as a function of ISS frequency, estimated from both datasets (ORIG, diamonds,  
427 and FREQ, circles). (a,b) Amplitude (a) and Lag (b) parameters of the periodic (sinusoidal) component of the  
428 response. (c,d) Asymptote (c) and timescale (d) parameters of the monotonic drift of the baseline toward greater  
429 hypometria. Each point is a condition defined by type of adaptation and ISS frequency. Blue and red colors correspond to  
430 horizontal Two-way and Global adaptation, respectively. Error bars are SEM across participants. These four parameters  
431 are further compared to the values predicted by the solution to the generative models tested.

432 **Fig 3. Assessment of the quality of the fits of the parametric phenomenological model to the group data.** (a,c)  
433 Each bar is split into the log of the odds ratio of the full model to a drift only model that lacks the sinusoidal component  
434 (darker tone of the bars) added to the log of the odds ratio of the drift only model to the noise only model described  
435 above (lighter tone of the bars). For all but one condition (Global adaptation, 24 cpd), the full model provides the best  
436 account of the data. (b,d) Estimates of the frequency of the periodic component of the oculomotor response, for dataset  
437 ORIG (b) and dataset FREQ (d). Error bars are SEM.

438 Some features are readily apparent from these plots. First, the frequency of the ISS is reliably  
439 estimated (cf. **Fig 3b,d**). Second, the amplitude and the lag of the periodic components of the  
440 adaptation gain decay with increasing frequency of the stimulus (**Fig 2a,b**). The amplitudes of the  
441 periodic component are systematically larger in Two-way adaptation, while the lags observed in  
442 global adaptation are systematically larger than in the Two-way case. The systematic decay of the  
443 values of the lag with increasing frequency does not seem to extend to the smallest frequency (1  
444 cpb in the new dataset). This may be related to the fact that at such low frequency the stimulus  
445 resembles more the behavior of a ramp that then turns rather than a truly periodic disturbance.

446 The parameters that affect the observed drift in the baseline (i.e., asymptote and timescale, **Fig**  
447 **2c,d**) remain rather independent of the experimental condition. This feature is more apparent in the  
448 ORIG dataset, but it still seems to hold in the FREQ dataset. An exception arises at the lower

449 frequency (1 cpb) tested in the FREQ dataset. However, the case of frequency one is rather  
450 special and should possibly be considered as transitional between periodic and non-periodic  
451 stimuli.

452 **Fig 3** provides an idea of the quality of the fits by showing the *evidence* of the data in favor of the  
453 models tested (cf. [11,13,28]). Upper and lower rows correspond to Two-way and Global  
454 adaptation type respectively. For dataset ORIG, **Fig 3a** shows the logs of the odds ratio of the  
455 parametric model of **Equation 8** against a noise only model consisting of the block mean with  
456 variance similar to that of the data. Each bar is split into the log of the odds ratio of the full model to  
457 a drift only model that lacks the sinusoidal component (darker tone of the bars) added to the log of  
458 the odds ratio of the drift only model to the noise only model described above (lighter tone of the  
459 bars). This separation is possible because the models are nested so that the simpler models can  
460 be obtained from the full model by eliminating parameters. The evidence then compares the  
461 density of models likely to fit the data. **Fig 3b** shows the estimation of the frequency of the  
462 oculomotor response against the actual frequency of the stimulus for the three frequency values  
463 tested in dataset ORIG (3, 4, and 6 cpb). **Fig 3c** and **3d** shows the evidence and the agreement of  
464 the response with the five frequencies used in dataset FREQ (1, 3, 6, 12, and 24 cpb).

#### 465 *State-equation fittings and model selection*

466 To assess the generative model, we fit **Equation 5** to all data available. For illustration purposes  
467 only, we first show that the model provides a reasonable overall fit to the group data. **Fig 4** shows  
468 fits of the oculomotor response predicted by the full form of the generative model given by  
469 **Equation 5** with all five parameters described in the **Methods** section:  $K$ ,  $A$ ,  $m$ ,  $D$  as well as the  
470 initial condition  $G$ . As before the qualitative agreement of the fits and the data is evident in both  
471 datasets. As we did with the phenomenological fits, we included the pre-adaptation blocks in each  
472 condition in each dataset.

473 **Fig 4. Fits of the oculomotor response predicted by the state-equation (Equation 5) with all five parameters.** The  
474 plots show adaptation gain (colored lines), averaged over individuals in the (a) Two-way adaptation and (b) Global  
475 adaptation condition of the ORIG data set (reported in [11]), as well as the (c) Two-way adaptation and (d) Global  
476 adaptation condition of the FREQ data set, using the same paradigm over an extended range of frequencies. The stimuli  
477 input in the model fits is  $s(\pi)$  (cf. **Equations 1-3**), which is zero in the preadaptation block. The same equation was fitted

478 to data from each participant in each condition and experiment, to estimate parameters of the generative model on an  
479 individual bases. For illustration purposes only, the figure depicts fittings done over the averages along with 95%  
480 confidence intervals (gray shaded areas).

481 For all subsequent analyses, we fitted models to individual data. In particular, we compared 16  
482 different models that differed from each other depending on which parameters were fitted (see  
483 **Methods** for details). We used Akaike's information criterion (AIC) to explore statistical selection  
484 among these models. Akaike weights (cf. section II of [40]) are shown in **Fig 5** segregated by  
485 model and condition, for datasets ORIG and FREQ, respectively. In each condition (identified by  
486 adaptation type and stimulus frequency), we computed a matrix of weights in the following way.  
487 Because the best fitted model may differ between individuals, we first computed the AIC weights  
488 among the 16 models for each participant and condition. Then we averaged the resulting individual  
489 weights across participants. Results from this procedure are shown in **Fig 5**.

490 **Fig 5. Akaike weights [40] for the 16 versions of the generative model, segregated by condition (frequency and**  
491 **type of adaptation).** The label along the middle y-axis indicates the model for the weight displayed in the horizontal  
492 bars. Results from dataset ORIG (**a**) and FREQ (**b**). Weights for each of the three frequencies for each type of adaptation  
493 (blue tones for Two-way expanding to the right, red tones for Global to the left) are stacked for each model and color-  
494 coded as in **Fig 1**. The models are grouped according to the criterion described in the subsection *Rationale for*  
495 *generative model building and parameter exploration* in the **Discussion** section (see text for further details). Gray areas  
496 in the background indicate the average weight of the corresponding model group.

497 Inspection of **Fig 5** suggests clear overall preference for models in groups II (which include  $m$  but  
498 not  $D$ ) and IV (featuring both  $m$  and  $D$ ). We discuss below why this is expected on theoretical  
499 grounds given the features of the data. Models from group IV that learn based on two error  
500 samples, are preferred in Two-way adaptation, specifically the full model ( $KAmDG$ ) and the model  
501 in which  $A$  was set to unity ( $KmDG$ ). Models in group II that feature a single learning rate (error-  
502 correcting based only on the last experienced feedback), specifically  $KAm$  and  $KAmG$ , have an  
503 edge in Global adaptation. In what follows, we will focus on a comparison of these four models.

504 **Fig 6** shows the values of the generative parameters (Mean  $\pm$  SEM,  $N = 10$  for dataset ORIG,  
505  $N = 13$  for dataset FREQ) of the best models that learn only from the last experienced feedback  
506 error ( $KAm$ ,  $KAmG$ ). Upper and lower rows correspond to datasets ORIG and FREQ respectively.  
507 Learning rate  $K$ , persistence rate  $A$  and drift parameter  $m$  are shown in columns **a**, **b** and **c** of **Fig 6**

508 respectively. **Fig 7** reports the parameters of the best models that update their hidden variable  
509 based on double error sampling. Those models are  $KmDG$  and  $KAmDG$ . **Fig 7 a-d** show  
510 respectively the learning rates  $K$  and  $D$  that weight the contributions of last and next-to-last  
511 feedback, the persistence rate  $A$  and the drift parameter  $m$ . Note that all models include the drift  
512 parameter  $m$  as a fitting parameter. We shall explain below why this should be expected.

513 **Fig 6. Average over individual parameters of generative models  $KAm, KAmG$ , the best among those that learn**  
514 **from the last feedback only (cf. Equation 5 with  $D = 0$ ).** Blue and red colors correspond to horizontal Two-way and  
515 Global adaptation, respectively. (a) Learning rate  $K$ , (b) Persistence rate  $A$ , and (c) bias or drift-parameter  $m$  are plotted  
516 as a function of condition. Both favored models feature  $A$  and  $m$  as fitting parameters. Note the variability in their fitted  
517 values across conditions, in particular for dataset FREQ. Error bars are  $\pm$ SEM.

518 **Fig 7. Average over individual parameters of generative models  $KmDG, KAmDG$ , the best among those learning**  
519 **from last and next-to-last feedbacks (double-error-sampling model; cf. full Equation 5).** Blue and red colors  
520 correspond to horizontal Two-way and Global adaptation, respectively. (a) Learning rate  $K$ , (b) Learning rate  $D$ , (c)  
521 Persistence rate  $A$ , and (d) bias or drift-parameter  $m$  are plotted as a function of condition. Both favored models feature  
522  $D$  and  $m$  as fitting parameters. Note that in both models, the bias parameter  $m$ , and the persistence rate  $A$  in model  
523  $KAmDG$ , display much lower variability in their fitted values across conditions when compared to that of **Fig 6**. (e,f)  
524 Addition and difference of both learning rates,  $\kappa = K + D$  and  $\eta = K - D$  (see text for discussion).

525 Again, several features are readily apparent from these plots. The learning rates ( $K$  and  $D$ )  
526 obtained from ORIG [11], show a rather clear segregation between Two-way adaptation and  
527 Global adaptation:  $K$  and  $D$  are larger for Two-way (blue colors) than for the Global case (red  
528 colors) suggesting that the extra variability brought upon by the random directions of the  
529 subsequent saccades characteristic of Global adaptation has a detrimental effect on all learning  
530 rates. They do not show a strong dependence on the frequency but the range of values used in  
531 that experiment was rather narrow, ranging from 3 to 6 cpb. This segregation in the learning rates  
532 between Two-way and Global adaptation is also clearly present in the best models fitted to dataset  
533 FREQ.

534 A feature observed in all cases is that in models that learn only from the last experienced error, the  
535 (single) learning rate ( $K$ ) shows a mild increase with the frequency. This changes substantially if  
536 learning from the next-to-last feedback is included. In all of these models, the following features are  
537 observed. First, the magnitude of  $K$ , the learning rate of the last-feedback error-correction term  
538 increases by about an order of magnitude with respect to the models that do not have next-to-last  
539 error-correction. Second, the magnitude of the next-to-last error learning rate ( $D$ ) is similar to that

540 of the last error ( $K$ ) but with opposite sign. This seems to suggest that the next-to-last error is  
541 weighted negatively (or actively attempted to be forgotten) in the algorithm. Third, the discrepancy  
542 in magnitude between  $K$  and  $D$  is consistently larger for Two-way than for Global adaptation  
543 (compare the separation between corresponding blue and red lines in **Fig 7, a** and **b**). Fourth, the  
544 learning rate  $K$  reverses its dependence with the frequency of the stimulus with respect to the  
545 models without  $D$ , and now decreases monotonically as the frequency of the stimulus increases. At  
546 the same time, the magnitude of  $D$  also decreases with the frequency. As a consequence, the  
547 discrepancy in magnitude between  $K$  and  $D$  is such that the addition of both learning rates  
548 approximately matches the range of the values of  $K$  fitted in the models that learn only from the  
549 last feedback (compare the values plotted in column **a** of **Fig 6** to those of column **e** in **Fig 7**). This  
550 suggests that when the additional error learning is not part of the model, the only learning rate  
551 fitted may represent an average across sub processes.

552 The values of the parameters fitted with the best four models are shown in **S1 Table** (Mean  $\pm$   
553 SEM,  $N = 10$  for ORIG,  $N = 13$  for FREQ). To assess dependence of the generative parameters on  
554 the experimental conditions we run  $2 \times 3$  (ORIG) and  $2 \times 5$  (FREQ) repeated-measures ANOVA  
555 on the fitted values using as regressors type of adaptation (Two-way and Global) and ISS  
556 frequency. Results are shown in **S2 Table** for the parameters given in **S1 Table**. We regard as  
557 more representative the results from dataset FREQ due to the more extended range of frequencies  
558 tested. Consistent with the qualitative observations mentioned above, while type of adaptation is  
559 highly significant for the learning rates in every model, frequency show significance for  $K$  and  $D$   
560 only in the models that feature double error sampling ( $KmDG$ , for both datasets,  $KAmDG$  only for  
561 FREQ) but not in those learning just from the last feedback ( $KAm$ ,  $KAmG$ ). As for the persistence  
562 rate, frequency is never significant suggesting that it can be kept fixed as in model  $KmDG$ . Type of  
563 adaptation is significant in  $KAm$  and  $KAmG$  but such significance disappears in  $KAmDG$ .

#### 564 *Analytical solution of the generative model: predicting the phenomenological parameters*

565 The iteration of state-equations that learn from the last feedback already qualitatively predicts both  
566 components of the phenomenological response. In general, the complete response can be

567 interpreted as a convolution of the stimulus with a *response function*. This response function  
568 integrates the stimulus by weighting the disturbance over a temporal window, the size of which  
569 depends on the magnitude of the learning and persistence rates that combine to assemble the  
570 weights (cf. **S1 Appendix**). Contributions from constant components of the disturbance that arise  
571 either from constant features in the stimulus (as in the traditional fixed-ISS paradigm [1]) or from  
572 intrinsic biases that may not be strictly error-based in nature (e.g., in our case represented by the  
573 drift parameter; cf. [37]) accumulate across trials, changing saccade gain in a monotonic fashion  
574 akin to a drift of the baseline towards an asymptote. Iteration of the systematically varying part of  
575 the disturbance results in its convolution with similar weights but the trial-by-trial variation usually  
576 prevents finding a closed form for the series re-summation. However, a sinusoidal disturbance  
577 avails a closed analytical integral solution, it is periodic with the same frequency, lagging the  
578 stimulus by a number of trials. Two new phenomenological parameters of this periodic response—  
579 its amplitude and lag—bare characteristic dependences on the learning parameters.

580 Above, we fitted the extended version of **Equation 8** to the data and obtained and reported  
581 estimates for its phenomenological parameters (i.e., frequency  $\nu$ , amplitude  $a$ , lag  $\phi$ , asymptote  
582  $B_0$ , timescale  $\lambda$  and decay amplitude  $B$ ; cf., **Fig 2** above). Similarly, we fitted the generative  
583 parameters for all generative models using the corresponding versions of **Equation 5**. **Figs 6** and  
584 **7** display those estimates for the four models that provided the best fits (excluding  $D$ :  $KAm$  and  
585  $KAmG$  and including  $D$ :  $KAmDG$  and  $KmDG$  respectively).

586 When the learning algorithm includes several error-based terms, **Equation 5** can be integrated  
587 using techniques standard within the theory of LTIS [42]. This integration provides analytical  
588 predictions of the phenomenological parameters as functions of the learning parameters fitted with  
589 the generative models (**Equations 9** through **14**). We attempt matching these predictions to the  
590 values fitted using the phenomenological parameter estimation implemented before (see **Fig 2**). It  
591 should be pointed out, however, that the phenomenological parameter values have also been  
592 obtained from fits to the data and therefore should only be regarded as indicative reference values  
593 to guide intuition, not as ground truth. Validation of the actual underlying structure of the learning



594 model relies ultimately on statistical model selection. Yet, a direct comparison between the fitted  
595 phenomenological parameters and analytical predictions evaluated on the fitted generative  
596 parameters is informative because a given value of a phenomenological parameter has to be  
597 compared to diverse combinations of the generative parameters depending on the specific  
598 structure of the learning model.

599 We start with **Equation 13** that provides a relationship between the expected asymptote of the  
600 adaptation gain at large trial number and the generative model parameters.

$$B_0 = \frac{m}{1 - (A - (K + D))}$$

601 A first significant observation about this expression is that in order to observe a drift in the baseline  
602 of the adaptation gain (i.e., in order to have an asymptote  $B_0 \neq 0$ ), a finite value of the drift  
603 parameter  $m$  is strictly necessary. If  $m$  vanishes, the adaptation gain would maintain a baseline  
604 pinned at zero regardless of the values of  $K$ ,  $A$  or  $D$ . In addition, in a situation where  $A \sim 1$ ,  $B_0 \approx \frac{m}{K+D}$   
605 or  $\frac{m}{K}$  in models where  $D = 0$ . Note that these are all signed magnitudes, not absolute values. In  
606 other words, a small learning rate  $K$  or a small number resulting from the addition  $K + D$  will  
607 modulate the size of the asymptote and will determine its sign (i.e., will modify the degree of  
608 hypometria or hypermetria). Still a finite value for  $m$  is strictly needed to have non-zero asymptote.  
609 Recall that when  $m$  is not a fitting parameter, its value is set to zero. Due to the pervasive baseline  
610 drift across all of our data, all models favored under statistical model selection contain  $m$  as a  
611 fitting parameter. This is why model groups II and IV (cf. **Fig. 5**) are preferred, as pointed out  
612 above and in the **Discussion**. Note, in addition, that the smaller the learning rate ( $K$  or  $K + D$ ), the  
613 larger the size of the asymptote  $B_0$ .

614 Experimentally, we observed drifts towards higher hypometria in all averages and in most of the  
615 individual data. Note that formatting the data in terms of *adaptation gain* instead of *saccade gain*  
616 allows us to remove confounds coming from constant contributions from the stimulus and therefore  
617 the parameter  $m$  should be regarded as intrinsic to the system. In other words,  $m$  characterizes or  
618 quantifies learning that would occur in absence of stimulus disturbance (i.e., with zero ISS), as if

619 the system has an intrinsic propensity to modify its gain by virtue of environmental or experimental  
620 conditions not necessarily linked to an error.

621 **Fig 8a** displays the matching of the analytical predictions of the asymptotes computed by inserting  
622 the fitted values of  $m$ ,  $A$ ,  $K$  and  $D$  into **Equation 13** for each participant's data, to the  
623 phenomenological estimation of  $B_0$  obtained from **Equation 8** and the parameter estimation of the  
624 phenomenological fits of the data for both datasets and both adaptation types.

625 **Fig 8. Comparison of phenomenologically fitted parameters to their theoretical predictions based on the**  
626 **generative model.** y-axes show the values obtained with the phenomenological parameter estimation (**Equation 8**); x-  
627 axes show predictions obtained by inserting the best estimated values of the generative parameters into the  
628 analytical expressions of **Equation 9-14** (cf. 'Using the generative model to predict the parameters of the  
629 phenomenological description of the adaptation gain' in the **Methods** section). Each row corresponds to one of the four  
630 best generative models. Each point is a single participant in a given condition and experiment. Data from the condition  
631 with a frequency of 1 cpb has been omitted because the predictions were poor for all models (in particular for the lag  
632 variable, see the text for a discussion of this point). (a) Asymptotes of the gain at large trial numbers ( $B_0$  in **Equation 8**  
633 vs predictions by **Equation 13**). (b) Timescale of the decay of the baseline ( $\lambda$  in **Equation 8** vs predictions by **Equation**  
634 **14**). Note the wide spread of the predicted values for models  $KAm$ , and  $KAmG$  that also results in several outliers beyond  
635 the limits of the subplot. In contrast, models  $KmDG$  tend to underestimate the phenomenological timescales. Model  
636  $KAmDG$  provides the best prediction of the phenomenologically fitted values with only two points just beyond the limits of  
637 the plot. (c) Amplitude of the periodic component of the gain ( $a$  in **Equation 8** vs predictions by **Equations 10-12**). Note  
638 that models  $KAm$  and  $KAmG$  tend to underestimate the observed amplitudes of the periodic component of the gain. (d)  
639 Lag of the periodic component of the gain ( $\phi$  in **Equation 8** vs predictions by **Equations 9-12**). The plots reveal a slight  
640 tendency for models  $KAm$  and  $KAmG$  to overestimate the length of the lag with respect to the predictions of the models  
641 including double error sampling ( $KmDG$  and  $KAmDG$ ).

642 A second parameter characteristic of the baseline drift is given by the timescale. **Fig 8b** shows  
643 predicted values for the timescales that result when values of  $m$ ,  $A$ ,  $K$  and  $D$  fitted with the state-  
644 equation are inserted in **Equation 14**. The first two rows of **Fig 8b** show a clear overestimation of  
645 the baseline timescale in models that do not feature double error sampling (i.e.,  $KAm$  and  $KAmG$ )  
646 as several individual data points fall outside the boundaries of the plot. Yet, models that include  
647 corrections based on the next-to-last error term, seem to underestimate the timescale (in particular  
648 model  $KmDG$ ). When introducing **Equation 14**, we pointed out that if the second error learning rate  
649  $D$  is negative, the dominant mode in the solution still features a monotonic decay that can fit the  
650 phenomenologically observed exponential baseline drift of the gain. This is indeed the case in the  
651 majority of fits to the individual participants' runs: Across models in group IV,  $D$  was non-negative  
652 in only 13% of the individual runs; 6% for Two-way adaptation and 21% for Global adaptation data.  
653 For model  $KmDG$ ,  $D$  was non-negative in 7% of all runs; with only 1% (1 run out of 95) for Two-way

654 adaptation and 14% for Global adaptation. Furthermore, when estimating the timescales of models  
655 that include double error-correction, **Equation 14** consistently gives smaller values than for models  
656 without the second error term (cf. compare subplots of **Fig 8b** for the corresponding models, and  
657 **Fig S1** in **S1 Appendix**). This ordering relation between the timescales of models with and without  
658  $D$  was unknown before conducting the fits. Thus, data collected using a sinusoidal adaptation  
659 paradigm suggests that including a second error-correction term yields a significant decrease in  
660 the timescale with respect to models featuring a single error-correction term. Therefore, the  
661 integration window (i.e., the inverse of the timescale) of models with double error-correction grow  
662 significantly larger compared to those that lack the second error sampling.

663 Asymptote and timescale are parameters traditionally investigated and reported in adaptation to  
664 fixed-step disturbances. Sinusoidal adaptation paradigms provide two additional parameters  
665 associated to the periodic component of the adaptation gain observed in these protocols. **Fig 8c**  
666 and **d** compare predictions for the amplitude and the lag of the periodic component of the gain  
667 obtained by using **Equation 9** through **12** above. Data from both datasets suggest that models that  
668 do not feature double error sampling underestimate the magnitude of the amplitude of the periodic  
669 component of the oculomotor response (cf. predictions from these models in **Fig 8c**). This feature  
670 in fact is common to all models that learn from a single feedback and include  $m$  (besides models  
671  $KAm$  and  $KAmG$ ; not shown) but the inclusion of  $D$  helps mitigating misestimation of this amplitude.

672 The last comparison is provided by the lag of the periodic component. **Fig 8d** compares predictions  
673 based on the state-equation learner (**Equations 9** and **11** furnish predictions for the components of  
674 the lag  $\phi$  and  $\varphi$  after inserting the parameter values fitted with **Equation 5**) and the  
675 phenomenology (parameter  $\phi$  in **Equation 8**). From **Fig 8c** and **d** it is apparent that the models  
676 that include both  $m$  and  $D$  as fitting parameters provide better predictions, also displaying less  
677 variability across participants, in particular for the Two-way adaptation type. Among models with  
678  $D = 0$ , again models  $KAm$  and  $KAmG$  fit best. **Fig 8d** shows, however, that these models appear to  
679 overestimate the lag (cf. compare corresponding subplots in the figure), while models that have a  
680 second learning rate  $D$  match better the empirically observed lag. In addition, all models fail the  
681 estimation of the lag for a disturbance of frequency one as they all significantly overestimate the

682 lag observed. Even though the predictions of the other phenomenological parameters are  
683 reasonable (the amplitude of the periodic component, timescale and asymptote), predictions for the  
684 1cpb condition for both Two-way and Global adaptation have been omitted altogether in **Fig 8**. This  
685 mismatch between the direct phenomenological estimation of the lag from the data and the  
686 analytical predictions arising from the integration of the state-equation for the case of the 1cpb  
687 condition, may be rooted in the fact that the functional dependence of the phenomenological  
688 parameters on the generative ones is determined by the specific sinusoidal dynamics of the driving  
689 stimulus, while the case of a 1-cpb frequency is the least periodic condition among all tested.

## 690 **Discussion**

691 We used a modified version of the traditional two-step saccade adaptation paradigm ([1]; see  
692 [2,46] for reviews) in which the size of the second step varied as a sinusoidal function of trial  
693 number with an amplitude of 25% of a fixed pre-saccadic target amplitude. We recorded observers'  
694 eye movements at a total of six different frequencies and applied the sinusoidal disturbance always  
695 along the saccade vector which was aligned either in a horizontal bi-directional fashion (Two-way  
696 adaptation) or in random directions drawn from a uniform circular distribution (Global adaptation).  
697 The oculomotor response, quantified by the adaptation gain, followed the disturbance variation with  
698 comparable frequency, an amplitude ranging between 10 and 30% of that of the stimulus (i.e., 2.5  
699 to 7.5% of the saccade amplitude), and lagging the stimulus by a few trials. In addition, it  
700 developed a systematic drift of the baseline towards larger hypometria that reached asymptotes of  
701 around 40% of the disturbance amplitude (i.e., 10% of the saccade amplitude) and was largely  
702 comparable across conditions. The phenomenological description in **Equation 8**—composed of a  
703 periodic response and an exponential decay—captured this behavior well and we estimated all six  
704 parameters pertaining to that description.

705 The present study explored whether the phenomenology described by **Equation 8** can be modeled  
706 with a state-equation, i.e., a generative rather than descriptive model of the underlying  
707 sensorimotor learning. We clearly show that the recorded saccade adaptation data is indeed

708 predictable in a robust and stable way using a linear time invariant state-equation similar but not  
709 identical to those proposed before in the literature. Moreover, in previous accounts, simulations  
710 based on generative models as well as ad-hoc fittings (mostly exponential or monotonic) of the  
711 temporal evolution of the gain were provided without specifying a pathway of how to evolve from  
712 one description to the other. We suggest that connection here and provide results of the derivation  
713 involved in transitioning between these descriptions.

#### 714 *Rationale for generative model building and parameter exploration*

715 In mathematical terms, the functional form in **Equation 8** is the integral solution of a family of  
716 LTISs of which **Equation 5** is a particular example. It is referred to as a state-equation or state-  
717 space model because the internal variable  $x$  characterizes the gain or state of adaptation of the  
718 system. This algorithm is *generative* because it estimates the value of  $x$  at trial  $n + 1$  by modifying  
719 its estimate at the previous trial including possible effects of systematic biases and correcting the  
720 former value by weighting sensory feedback resulting from movement execution [21,26,47,48] (see  
721 also [25,32]; for further details on our specific use see the **Methods** section). Here we limit our  
722 discussion to *noise-free* generative models in that **Equation 5** does not include any noise term.  
723 Yet, **Fig 1** together with **Fig 4** suggest that integral solutions as well as numerical outcomes of  
724 noise-free generative models survive ensuing variability, at least for the paradigm, type of stimulus  
725 and within the ranges of the conditions tested.

726 We analyzed 16 models that differed in the specific parameters that were fitted and then used  
727 Akaike's information criteria to attempt model selection. Since we were primarily modeling intrinsic  
728 error-based sensorimotor learning, the learning rate  $K$ —that weights the impact of the last  
729 feedback error on the state of adaptation—was present in every model. Second, we included the  
730 initial condition  $G$  as a fitting parameter in half of the models. This parameter is not part of the trial-  
731 by-trial learning algorithm and its effect should decay as the trial number increases (cf., **Equation**  
732 **7**). However, the initial condition affects the amplitude of decay of the baseline drift (cf.  $B$  in  
733 **Equation 8**). Because the argument of **Equation 5** is an internal variable not directly  
734 experimentally accessible, a proxy for its initial value can only be approximated (for example, by

735 averaging the first five gain values in the block) or included as a fitting parameter. Third, we  
736 included a persistence rate  $A$  that weighted how much of the estimate from the previous movement  
737 remained in the subsequent one. The fourth parameter,  $m$ , captured systematic effects, that are  
738 not error-based in nature, and gave origin to drifts in the baseline that were pervasive across all  
739 conditions. Finally, we considered the plausibility and study the effects of a second learning rate  $D$   
740 that tracks errors other than the most recent (here, the next-to-last feedback error).

741 To further discuss the effect of the generative parameters, we split the 16 models into four  
742 groups:

- 743 I. Models that neither included terms depending on the second learning rate  $D$  nor the drift  
744 term  $m$  ( $K$ ,  $KG$ ,  $KA$ ,  $KAG$ );
- 745 II. Models without terms depending on  $D$  but including  $m$  ( $Km$ ,  $KmG$ ,  $KAm$ ,  $KAmG$ );
- 746 III. Models including terms depending on  $D$  but excluding  $m$  ( $KD$ ,  $KDG$ ,  $KAD$ ,  $KADG$ );
- 747 IV. Models with both  $D$  and  $m$  terms included ( $KmD$ ,  $KAmD$ ,  $KmDG$ ,  $KAmDG$ ).

748 We recall that in models where  $A$  is not a fitting parameter,  $A = 1$ . The groups are listed on the left  
749 side of **Fig 5**. Models within group I consistently fitted worst. Moreover, models that do not include  
750  $m$  (groups I and III) cannot capture an evolution of the gain into a stationary asymptotic value  
751 because the state equation does not admit a solution featuring that behavior (that is, if the stimulus  
752 has no constant term). These models, however, may be useful in experimental paradigms where a  
753 stable state of adaptation is not clearly reached either because the length of the adaptation block  
754 used may be too short or because the driving disturbance is unbounded (for example a linear  
755 ramp). On the other hand, models that include sampling from two errors (cf. groups III and IV) will  
756 likely be better suited to extract correlations built into the stimulus as it is the case of a sinusoidal  
757 ISS.

758 The fits of the phenomenological model (**Fig 1; Equation 8**) suggest that asymptotic behavior of  
759 the baseline and reflection of the stimulus self-correlation (entraining) were clear structural  
760 properties of the oculomotor response. The analytical solutions of models in both groups II and IV

761 are consistent with this phenomenology. **Fig 5** summarizes the AIC weights emerging from the fits  
762 to the individual participants' data. The weights shown in the horizontal bars are averages over  
763 individual participants' weights for each condition and color coded by the frequency of the stimulus.  
764 Data from Two-way adaptation is depicted with blue tones in bars increasing towards the right.  
765 Global adaptation is shown with bars spanning to the left in red tones. The average weight for each  
766 model family is shown by the gray background behind the corresponding group. While models in  
767 group II already generate responses in qualitatively good agreement with the evolution of the  
768 adaptation gain, it remains to be decided whether corrections based on the memory of more than a  
769 single error provide for a better fit. AIC weights show that group IV clearly outperforms all others in  
770 Two-way adaptation in both datasets, suggesting that the best generative model to describe this  
771 type of adaptation includes all four parameters  $K$ ,  $A$ ,  $m$  and  $D$ . In Global adaptation, models from  
772 group II either match or slightly outperform those of group IV. Model comparison showed that a  
773 state-equation including a single parameter or any combination of only two of the four parameters  
774  $K$ ,  $A$ ,  $m$  and  $D$  could not adequately account for our data (cf. **Fig 5**). In addition, an inspection of  
775 actual values of the parameters fitted across the population suggests that the parameters  $A$  and  $m$   
776 may be set to constant values, that is, to almost one for the former and to a very small and  
777 negative number for the latter (cf. **Fig 7**, columns **c** and **d**), at least within the range of frequencies  
778 tested in these experiments. Overall, the drift parameter  $m$  and the second learning rate  $D$  proved  
779 useful and necessary to account for systematic effects in our data, suggesting (1) that some  
780 changes in the adaptation state are not error-based and (2) that—at least under specific  
781 circumstances—the brain keeps track of at least one extra occurrence of the error besides the last  
782 experienced one. Three-parameter models that did not involve  $D$  (specifically  $KAm$ ) were most  
783 successful in Global adaptation and in the high frequencies of Two-way adaptation. This could be  
784 simply a reflection of increased levels of measurement noise in these conditions giving an upper  
785 hand to models with fewer parameters. More interestingly, it could point to an architecture that  
786 samples two errors only under certain conditions, for instance, when errors are  
787 repeatedly experienced for the same saccadic vector, or, when the variation of the feedback error

788 has a high signal-to-noise ratio. We speculate that overtraining along a given direction, understood  
789 as the repetitive experience of consistent error along similar saccade vectors in Two-way  
790 adaptation (note that in our paradigm Two-way adaptation stimulates only two retinal locations)  
791 may give rise to vector specificity and, consequently, to the adaptation fields typically observed  
792 with fixed-step paradigms. Indeed, Rolfs and collaborators [18] suggested that Global adaptation,  
793 featuring apparent full transfer across random directions, appears to onset ahead of the  
794 development of vector-specific adaptation fields. This appears consistent with the present finding  
795 that models that rely on a single error-correction show timescales corresponding to faster evolution  
796 of the baseline drift (although with longer lags in the sinusoidal component) as compared to those  
797 of Two-way adaptation (featuring shorter lags in the sinusoidal component consistent with tracking  
798 the stimulus more closely due to the repetitive training in a specific direction).

799 *Drift in the baseline and the meaning of  $m$*

800 The persistent drift of the baseline towards higher hypometria is a distinctive feature in our data  
801 that cannot be accounted for on the basis of motor adaptation [49]. We included an extra  
802 parameter  $m$  to account for this drift in mean adaptation gain towards an asymptote differing from  
803 the mean of the stimulus (cf. **Equation 13**). This parameter is conceptually novel, distinct and  
804 independent of the persistence rate  $A$ , and determines the presence of a non-zero asymptote via  
805 **Equation 13**. Because in our paradigm the goal of the task was to land on the target as close as  
806 possible, and because the sinusoidal ISS introduced a continuously changing prediction error, the  
807 best expected outcome would be to track the disturbance within the levels of error typical of trials  
808 without disturbance. With respect to that goal, the presence of a baseline drift introduces an  
809 additional discrepancy that does not, however, hinder successful adaptation to the disturbance.

810 Saccadic eye movements slightly undershoot their target on average [50] and this systematic offset  
811 corresponds to the internally predicted visual outcome of a saccadic eye movement [51,52]. We  
812 surmise that our paradigm may have yielded a re-calibration of this desired offset [53] over the  
813 course of an experimental run. This recalibration towards a larger undershoot may result from the  
814 high probability of a quick return saccade after every eye movement in our fast-pace paradigm,



815 reducing the utility of maintaining a saccade gain close to one. We note that this systematic  
816 decrease in saccade gain may in general—albeit to different degrees—pervade the study of  
817 saccadic adaptation (but see [7,54]). In fixed-step paradigms (as opposed to the sinusoidal  
818 paradigm employed here), however, it would have been obscured as the error-based correction for  
819 the surreptitious target displacement undergoes similar dynamics as the drift reported here.

820 On the other hand, from the point of view of the internal model of the movement that the brain may  
821 implement [33-35], this bias parameter  $m$  may hint to a discrepancy between the experimental  
822 coordinate system where measurements are acquired and the coordinate system in which the  
823 internal model is represented.

824 On a neurophysiological level, the small systematic bias that gives rise to the drift of the baseline  
825 may originate from the dynamics of the responses in the neuronal substrates involved with  
826 saccade adaptation ([55-60], Reza Shadmehr, *personal communication*, July 12, 2018). It is also  
827 possible that the fast-pacing used in our paradigm exacerbates effects that generate a small and  
828 negative bias parameter,  $m$ , which appeared to onset already at the pre-adaptation block. That  
829 would further suggests that the magnitude of  $m$  may depend on the inter-saccade interval as well  
830 as on the precise timing of the ISS onset, which should be addressed in future studies.

831 *Consequences of learning from double error sampling (D parameter): Two learners?*

832 The models that best explained the data featured a double error sampling, learning not only from  
833 the feedback experienced after the last saccade but also from the movement that occurred in a trial  
834 before that. Hence, the best models used a feedback reaching further back in time through the  $K$ -  
835 and  $D$ -terms of **Equation 5**. Yet, does the oculomotor system actually implement this double error  
836 sampling that may coherently participate in a single internal model prediction? We suggest that the  
837 brain may attempt to approximate the performance achieved by the double-error-sampling  
838 algorithm by using two single-feedback learners operating on appropriate combinations of the  
839 stimulus sampled at two different times.

840 To understand that, we return to **Equation 5**. For simplicity, we will assume that  $m = 0$ .

841  $x(n+1) = (A - K)x(n) - Dx(n-1) + Ks(n) + Ds(n-1),$  (5a)

842 and write a transformation among state variables sampled at two different trials as,

$$X_+(n) = \frac{1}{2}\{x(n) + x(n-1)\} \text{ and } X_-(n) = \frac{1}{2}\{x(n) - x(n-1)\},$$

843 that can be substituted in the RHS of **Equation 5a** using the inverse relations:

$$x(n) = X_+(n) + X_-(n), \text{ and } x(n-1) = X_+(n) - X_-(n).$$

844 We can re-write **Equation 5a** in terms of these alternative state variables  $X_+$  and  $X_-$ :

845  $X_+(n+1) + X_-(n+1) = (A - \kappa)X_+(n) + (A - \eta)X_-(n) + \kappa S_+(n) + \eta S_-(n),$  (5b)

846 where we adopted the definitions of  $\kappa = K + D$ ,  $\eta = K - D$ ,  $S_+(n) = \frac{1}{2}(s(n) + s(n-1))$  and

847  $S_-(n) = \frac{1}{2}(s(n) - s(n-1))$ . **Equation 5b** avails the interpretation of the generative model as

848 selectively learning into two component channels that learn from a single feedback error taken

849 from different sources. The source for the learner  $X_+$  is the mean of the two samplings of the

850 stimulus, i.e.,  $S_+(n) = \frac{1}{2}(s(n) + s(n-1))$ . The source for the second learner is the rate of change

851 of the stimulus across the sampling events given by  $S_-(n) = \frac{1}{2}(s(n) - s(n-1))$  which, when the

852 samplings occur on successive trials, it could be interpreted as the discrete time derivative of the

853 stimulus taking the elementary timestep as the (average) inter-trial interval.

854 Note that the representation in terms of these alternative internal variables would significantly alter

855 the underlying structure of the noise-free learning model. But if we insist on keeping a close

856 connection to the parameters extracted using the double-error-sampling algorithm, we would

857 expect that the learning rate for learner  $X_+$  would be the addition of the rates for the two errors,

858  $\kappa = K + D$ , while for learner  $X_-$  it would be  $\eta = K - D$  (cf. **Fig 7**, columns **e** and **f**). In all our fittings

859 using the double error sampling,  $K$  and  $D$  were very close in magnitude but carried opposite sign.

860 Furthermore,  $\kappa$  was small and similar in magnitude to the learning rate  $K$  obtained for models that

861 learned only from the last error. Because  $D$  was negative, the learning rate  $\eta$  for the second learner

862 became also positive but much larger than  $\kappa$ , in fact about an order of magnitude larger (**Fig 7**,

863 columns **e** and **f**) effectively enhancing the overall gain of the process without driving the system  
864 unstable [61-63]. As a consequence,  $(A - \kappa)$ , which can be thought of as an *effective*  $A_+$  will be  
865 much closer to unity than  $A_- = (A - \eta)$ . Therefore,  $X_+$  will learn and forget much slower than  $X_-$ .

866 Using this double error sampling, the oculomotor system could track the rate of change of the  
867 stimulus from one saccade to the next, besides just its last change in size and it would  
868 approximate the learning efficiency of the double-error-sampling algorithm. The new internal  
869 learning variables ( $X_+$  and  $X_-$ ) would learn from smoothed-out versions of the disturbance resulting  
870 from the average sum and difference of the two sampled inputs. Whether this constitutes an  
871 advantage over learning exclusively from the last feedback depends on the nature of stimulus. If  
872 the disturbance is constant or fully random there would be very little advantage in performing the  
873 double error sampling. In the former case, the inter-sampling variation is zero leaving nothing to  
874 learn. In the latter, the inter-sampling variation would be another random magnitude and there  
875 would be little advantage in learning from the variation in the feedback. However, if the mean of the  
876 disturbance varies in a systematic way—as it does during sinusoidal adaptation, and presumably in  
877 natural scenarios—learning from its rate of variation would be advantageous and could well justify  
878 a large learning rate. In the representation of the double-error-sampling model, unlearning actively  
879 the next-to-last sampled feedback error (i.e., with a large and negative  $D$  subtracted from an  
880 enhanced  $K$ ) would materialize this advantage with little extra investment. However, a negative  
881 learning rate feels counter-intuitive as learning is believed to follow the direction of the correction  
882 suggested by the feedback. Segregation of the learning underlying motor (or saccade) adaptation  
883 into two learners displaying similar characteristics to those suggested here have indeed been  
884 proposed in other contexts [8,25,64,65]. The argument presented above suggests a mechanistic  
885 way to construct a two-learner system, in which the components  $X_+$  and  $X_-$  can be considered  
886 statistics in counterphase. To approximate the double-error-sampling learner, the system may hold  
887 in memory both samples, compute mean sum and differences between the samples and  
888 implement two learners based on those statistics rather than from bare values of errors or stimulus  
889 occurrences. To achieve that, the oculomotor system would need to keep memory and weight  
890 prediction errors from a former time scale besides the last feedback [65].

891 An important point to notice is that, even if there is double error sampling, it does not need to be  
892 strictly the next-to-last error. It would be enough that the brain keeps a correlation of errors over  
893 two different trials (cf. [66]) although it would be reasonable that they are spaced only by a short  
894 delay [61]. This is a reasonable generalization since the inter-trial interval is rather arbitrarily set by  
895 the pacing of the task that may or may not match a possible internal sampling frequency by the  
896 brain. The frequency of the stimulus then determines to what degree differences in the stimulus  
897 can be sampled, which may explain the dependence of the amplitude and lag of the periodic  
898 component of the response with the frequency as well as the fact that the evidence for the full  
899 model seems to peak at intermediate frequencies. In other words, it may be easier to learn at  
900 certain frequencies (for a fixed amplitude) or at certain effective rates of change of the stimulus.

901 *Dependency of learning rate on perturbation dynamics: Linear but not strictly Time Invariant*  
902 *Systems*

903 We further explored whether the values of the generative parameters exhibited dependence on the  
904 experimental condition, specifically with the type of adaptation and the frequency of the  
905 disturbance. The parameters of our models remained time-invariant across pre-adaptation and  
906 adaptation blocks. However, we did not rule out that these parameters may change with adaptation  
907 type and stimulus frequency. In fact, LTIS models with parameters not strictly time-invariant have  
908 been invoked to model (meta-learning in) savings in adaptation to visuomotor rotations [32]. Strict  
909 LTIS models with two learners had been able to successfully account for savings in long-term  
910 saccade adaptation [8,25,64,67]) but were not able to fit differences in the dynamics of the  
911 adaptation, extinction and re-adaptation phases observed using counter-adaptation and wash-out  
912 paradigms in adaptation to visuomotor rotations without letting the rates change across the phases  
913 [32].

914 We limit our discussion to the best four generative models selected in the **Results** section. In  
915 models  $KAm$  and  $KAmG$  (and in general in all models of groups I and II), the (only) learning rate  $K$   
916 remained relatively independent of, or exhibited a tendency to grow with, the frequency of the  
917 stimulus (**Fig 6a**). Learning rates for Two-way adaptation roughly ranged between 0.01 and 0.035

918 fraction of the error across the frequencies tested. The same parameter in Global adaptation was  
919 smaller and remained within the range 0.005 to 0.015 (cf. **Fig 6a** and **S1 Table**). These  
920 observations were confirmed by ANOVAs run on the fitted values of the parameter  $K$  in models  
921  $KAm$  and  $KAmG$  in that type of adaptation was always a significant factor while ISS frequency  
922 never was (**S2 Table**). These values of  $K$  compare reasonably well with the magnitude of learning  
923 rates previously reported in the literature (cf. [8,19]). The dependence of the learning rate on the  
924 frequency of the disturbance seems in qualitative agreement with results from reaching  
925 experiments in which subjects learned to track a target undergoing surreptitious displacement that  
926 followed a random walk [30,47]. Using a Kalman filter to estimate corrections to the learning rate  
927 due to various types of variability Burge and collaborators [30] argued that the learning rate  
928 increased as the drift of the walker increased. In the sinusoidal adaptation paradigm where the  
929 amplitude of the sine function that produces the ISS is of fixed amplitude, this situation occurs  
930 when the frequency increases because its size from one trial to the next changes faster. However,  
931 this suggestion seems at odds with the intuition that a more consistent stimulus should drive more  
932 efficient adaptation [68,69]. In particular, it has been reported that a smooth gradual variation  
933 results in more efficient adaptation [3,70]. If this were the case and reflected onto the model  
934 parameters, the learning rate should be higher for smaller frequencies.

935 However, the dependence of the learning rate(s) on the frequency described above changed rather  
936 dramatically when double error sampling was included (cf. **Fig 7**, columns **a** and **b**). Interestingly,  
937 in models that feature double error sampling, the learning rate of the most-recent error-term ( $K$ )  
938 reversed its tendency and decreased as the frequency increases, achieving its highest values in  
939 the conditions of lower frequency, this is, in situations where the stimulus displayed higher  
940 consistency. Concurrently, the learning rate for the next-to-last feedback ( $D$ ) achieved its most  
941 negative values at lower frequencies and grew less negative as the stimulus frequency increased.  
942 In the alternative scenario of two additive learners with single error correcting terms that learned  
943 respectively from the half-sum and the half-difference of the two sampled errors suggested in the  
944 previous sub-section, the learning rates  $\kappa$  and  $\eta$  also showed a distinct dependency on the ISS  
945 frequency. The *slow-learner* (with learning rate  $\kappa$ ) would only have corrected up to 1% of the

946 average of the two errors sampled while the *fast-learner* (with rate  $\eta$ ) would have produced  
947 corrections of up to 40% of the change experienced between the two sampled errors (cf. **Fig 7e**  
948 and **f**). Note that this massive change in the dependence of the learning rates on the frequency  
949 was a consequence of changing the hypothesized structure of the model and not of correcting the  
950 magnitude of the rates for effects of variability. Once again, ANOVAs confirmed that not only the  
951 type of adaptation but also the stimulus frequency had significant impact on the learning rates ( $K$   
952 and  $D$ , as well as  $\kappa$  and  $\eta$ ) in models  $KmDG$  and  $KAmDG$  as well as all models of group IV (cf. **S2**  
953 **Table**).

954 In contradistinction, the retention rate  $A$  (**Figs 6b** and **7c**) and the bias parameter  $m$  (**Figs 6c** and  
955 **7d**) remained relatively independent of the frequency under such changes, although their overall  
956 variability was clearly reduced in the models featuring double error sampling (contrast the value  
957 ranges of  $m$  and  $A$  in **Fig 6**, against the corresponding ones in **Fig 7**, aside from model  $KmDG$  in  
958 which  $A = 1$ ; see also corresponding entries in **S1 Table**). ANOVAs run over these parameters  
959 further confirmed non-significance of the frequency except for model  $KmDG$  on  $m$  in dataset ORIG  
960 (**S2 Table**). Type of adaptation occasionally modulated  $A$  in dataset FREQ in models with a single  
961 error term. Taken altogether these suggests that both  $A$  and  $m$  may be largely frequency  
962 independent and can be modeled as constant values maybe differing in value for Two-way and  
963 Global types.

964 In summary, introducing a second error term increased the magnitude of both learning rates ( $K$   
965 and  $D$ ) by an order of magnitude with opposing signs. The learning rates of these models showed  
966 a clear dependence on the frequency of the disturbance: higher stimulus consistency (i.e., lower  
967 stimulus frequencies) correlated with higher adaptation efficiency. At the same time, the inclusion  
968 of the double error sampling reduced variability in the estimates of the persistence rate  $A$  and the  
969 drift parameter  $m$ , indicating that their estimates were not affected by the ISS frequency, and could  
970 thus be set to appropriate constant values.

971 *Relation to previous work on sensorimotor control and adaptation*

972 Multiple distinct learning processes contribute to sensorimotor adaptation [8,25,64-66,71]. Recent  
973 research conducted primarily within adaptation to visuomotor rotations or in reaching movements,  
974 suggests that adaptation can be decomposed into two fundamental processes that may operate in  
975 parallel: one that would be responsible for implicit learning that progresses slowly and can be  
976 described mechanistically by a state-equation [49]. This slow learning process is relatively stable  
977 over breaks, takes place with automatic, reflex-like behavior and its properties tend to be sturdy  
978 and do not change fast with recent experience. A second, parallel process, in turn, learns explicitly,  
979 is faster although it may require longer reaction time and possibly voluntary behavior to be  
980 engaged. This faster process would exhibit longer term memory of prior learning [71-74].

981 We believe that our paradigm taps only the first, implicit component. Yet, we suggest that our  
982 analyses provide evidence for two separable subcomponents, although both would be intrinsic in  
983 nature [75]. In fact, a key difference between our oculomotor learning and learning that occurs in  
984 adaptation to visuomotor rotations and during reaching in force fields is that our participants were  
985 primarily unaware of the inducing disturbance. In contrast, in the aforementioned paradigms,  
986 participants immediately notice a disturbance even when they may not be fully aware of the exact  
987 effect. In this sense, our paradigm could be considered qualitatively closer to that used by Cheng  
988 and Sabes [22] who studied calibration of visually guided reaching in participants fully unaware of  
989 the stimulus manipulation. Their paradigm used a random, time-varying sequence of feedback  
990 shifts. They found that a linear dynamical system (LDS) with a single error term and trial-by-trial  
991 state update for variability implemented with an estimation-maximization algorithm successfully  
992 described mean reach point and the temporal correlation between reaching errors and visual shifts.  
993 They further argued that the learning taking place under a random stimulus generalizes to a  
994 situation of constant shifts in a block paradigm and, therefore, that adaptation dynamics does not  
995 rely on the sequence (or correlation) of feedback shifts but can be generally described with the  
996 LDS model. In contrast to random or block constant ISS, our paradigm featured a disturbance that  
997 was fully self-correlated since it followed a sine variation with the trial number. Therefore, it may  
998 prove advantageous for the oculomotor system to extract correlations embedded in the

999 disturbance because they would help tracking the target. As pointed out, including double error  
1000 sampling would serve this purpose.

1001 We believe that the presence of a systematically varying disturbance enables a further  
1002 decomposition of the implicit component of adaptation, perhaps into a primary one, that attempts to  
1003 mitigate the end-point discrepancy regardless of self-correlations in the disturbance, and a second  
1004 one that attempts to extract (and use) such correlations. It remains an open question how these  
1005 putative subprocesses may map on distinct or overlapping anatomical structures, such as  
1006 cerebellar cortices, deep cerebellar nuclei and extracerebellar structures [55,57,59,60,64,76-80].

1007 A recent study suggested that learning in dynamic environments may be adequately modeled with  
1008 an algorithm popular in industrial process control, the proportional-integral-derivative (PID)  
1009 controller [81]. The algorithm generates a control signal adding three error-related contributions: a  
1010 term proportional to the current error that resembles a usual delta-rule (the P-term), a term that  
1011 integrates over a history of errors experienced before the current one, and a derivative term  
1012 estimated from the difference between the last two errors. The model shares some features with  
1013 ours, in particular that the learning rate for the next-to-last error needs to be negative to  
1014 approximate the derivative term. The PID controller acts on the actual recorded errors (the  
1015 equivalent of the visual errors observed after each saccade is executed) and contains no internal  
1016 state estimation, whereas our model operates on an internal variable that contains the state  
1017 estimation of the prediction error that would result from the movement execution. Our state variable  
1018 in fact accumulates and retains a substantial portion of the history of previous error (the  
1019 persistence term in **Equation 5**, see also the example given in **S1 Appendix**), which is updated on  
1020 a trial-by-trial basis by the term proportional to the latest prediction error (the delta-rule term). The  
1021 inclusion of an extra error in our state-equation (specifically that of the previous to last one)  
1022 effectively brings into play a contribution similar to the derivative term of the PID model. In short,  
1023 our *D*-term enables a systematic correction to the integral term (our *A*-term) that otherwise would  
1024 be determined rigidly by the iteration of the equation. In that respect, keeping track of former errors  
1025 enables a structural correction that acts at a global level even when it is introduced on a trial-by-  
1026 trial basis, lending both robustness and flexibility to the algorithm. Ritz and collaborators [81]



1027 further compared the performance of the PID model to a Kalman filter used to update a state  
1028 variable in presence of noise applied on the single error structure of the usual delta-rule and found  
1029 that the PID controller performs better. A further similarity with the aforementioned work lies in their  
1030 observation that models with a derivative term are usually not readily selected under statistical  
1031 model selection even when they may display significant improvement in the description of the  
1032 behavior (see [81] for a longer discussion on this point).

### 1033 **Conclusions**

1034 Having adequate generative models that describe eye movements have been stressed before  
1035 [80,82-86] as an important tool to assess, at the single patient level, a variety of movement  
1036 abnormalities that have been identified as markers of neurological conditions or disorders at a  
1037 group level. In this study, elaborating on the idea of tracking a memory of errors [65], we attempted  
1038 to identify and constrain a relatively minimal set of requirements that would suffice to model  
1039 saccade adaptation data collected under the paradigm and stimulus that we recently implemented  
1040 [11] but that would also include previous accounts of the phenomenon under other known  
1041 paradigms. While certainly many refinements are still due, we unveiled features of an algorithm  
1042 that seems suitable to account for the sensorimotor learning observed in our data. We hope it can  
1043 be generalized, extended and adapted for use in future research.

### 1044 **Acknowledgements**

1045 We thank Thérèse Collins and members of the Rolfs lab for insightful discussions and help with  
1046 data collection.

1047

1048 **S1 Table. Generative parameters fitted with the best four models.** Model name is shown at the top. The  
1049 corresponding datasets can be identified by the stimulus frequencies tested: ORIG: 3, 4 and 6cpb. FREQ: 1, 3, 6, 12 and  
1050 24cpb.

1051 **S2 Table. ANOVA results on the generative parameters fitted with the best four models.** Repeated-measures  
1052 ANOVA (2 X 3 on data from ORIG; 2 X 5 on data from FREQ) with factors type of adaptation and stimulus frequency was

1053 run on each of the four best models. Model name is shown at the side of the table and parameter names are on the top.  
1054 The dataset is indicated in the cell at the upper left corner next the the parameter names. Highlights indicate the cases  
1055 where the corresponding factor shows significant effects.

1056 **S1 Appendix. Predictions of a state-equation with a sigle, most-recent error-based correction term. Effects of**  
1057 **including next-to-last error-sampling.**

1058 **References**

- 1059 1. McLaughlin SC. Parametric adjustment in saccadic eye movements. *Perception &*  
1060 *Psychophysics*. 1967;2: 359–362. doi:10.3758/BF03210071
- 1061 2. Hopp JJ, Fuchs AF. The characteristics and neuronal substrate of saccadic eye movement  
1062 plasticity. *Prog Neurobiol*. 2004;72: 27–53. doi:10.1016/j.pneurobio.2003.12.002
- 1063 3. Herman JP, Cloud CP, Wallman J. End-point variability is not noise in saccade adaptation.  
1064 *PLoS ONE*. 2013;8: e59731. doi:10.1371/journal.pone.0059731.g001
- 1065 4. Harwood MR, Wallman J. Temporal dynamics and strategy in saccade adaptation. Program  
1066 No 99011 Neuroscience Meeting Planner San Diego, CA: Society for Neuroscience, Online  
1067 2004.
- 1068 5. Collins T, Heed T, Röder B. Eye-movement-driven changes in the perception of auditory  
1069 space. *Atten Percept Psychophys*. 2010;72: 736–746. doi:10.3758/APP.72.3.736
- 1070 6. Azadi R, Harwood MR. Visual cues that are effective for contextual saccade adaptation.  
1071 *Journal of Neurophysiology*. 2014;111: 2307–2319. doi:10.1152/jn.00894.2013
- 1072 7. Chen-Harris H, Joiner WM, Ethier V, Zee DS, Shadmehr R. Adaptive control of saccades via  
1073 internal feedback. *Journal of Neuroscience*. 2008;28: 2804–2813.  
1074 doi:10.1523/JNEUROSCI.5300-07.2008
- 1075 8. Ethier V, Zee DS, Shadmehr R. Spontaneous recovery of motor memory during saccade  
1076 adaptation. *Journal of Neurophysiology*. 2008;99: 2577–2583. doi:10.1152/jn.00015.2008
- 1077 9. Bridgeman B, Hendry D, Stark L. Failure to detect displacement of the visual world during  
1078 saccadic eye movements. *Vision Research*. 1975;15: 719–722.
- 1079 10. Robinson FR, Noto CT, Bevans SE. Effect of Visual Error Size on Saccade Adaptation in  
1080 Monkey. *Journal of Neurophysiology*. American Physiological Society; 2003;90: 1235–1244.  
1081 doi:10.1152/jn.00656.2002
- 1082 11. Cassanello CR, Ohl S, Rolfs M. Saccadic adaptation to a systematically varying  
1083 disturbance. *Journal of Neurophysiology*. 2016;116: 336–350. doi:10.1152/jn.00206.2016
- 1084 12. Cassanello C, Ohl S, Rolfs M. Saccadic plasticity induced by a periodic disturbance of visual  
1085 feedback. *Journal of Vision*. The Association for Research in Vision and Ophthalmology;  
1086 2014;14: 740–740. doi:10.1167/14.10.740
- 1087 13. Hudson TE, Landy MS. Measuring adaptation with a sinusoidal perturbation function.  
1088 *Journal of Neuroscience Methods*. 2012;208: 48–58. doi:10.1016/j.jneumeth.2012.04.001
- 1089 14. Gray MJ, Blangero A, Herman JP, Wallman J, Harwood MR. Adaptation of naturally paced  
1090 saccades. *Journal of Neurophysiology*. 2014;111: 2343–2354. doi:10.1152/jn.00905.2013
- 1091 15. Baddeley RJ, Ingram HA, Miall RC. System identification applied to a visuomotor task: near-  
1092 optimal human performance in a noisy changing task. *J Neurosci*. 2003;23: 3066–3075.
- 1093 16. Nassar MR, Wilson RC, Heasley B, Gold JI. An approximately Bayesian delta-rule model  
1094 explains the dynamics of belief updating in a changing environment. *Journal of*  
1095 *Neuroscience*. 2010;30: 12366–12378. doi:10.1523/JNEUROSCI.0822-10.2010
- 1096 17. Rescorla RA, Wagner AR. A theory of Pavlovian conditioning: Variations in the effectiveness  
1097 of reinforcement and nonreinforcement. Prokasy WF, editor. *Classical conditioning II: Current*  
1098 *research and theory*; 1972.

- 1099 18. Rolfs M, Knapen T, Cavanagh P. Global saccadic adaptation. *Vision Research*. Elsevier Ltd; 1100 2010;50: 1882–1890. doi:10.1016/j.visres.2010.06.010
- 1101 19. Srimal R, Diedrichsen J, Ryklin EB, Curtis CE. Obligatory Adaptation of Saccade Gains. 1102 *Journal of Neurophysiology*. 2008;99: 1554–1558. doi:10.1152/jn.01024.2007
- 1103 20. Donchin O, Francis JT, Shadmehr R. Quantifying generalization from trial-by-trial behavior 1104 of adaptive systems that learn with basis functions: theory and experiments in human motor 1105 control. *J Neurosci*. 2003;23: 9032–9045.
- 1106 21. Cheng S, Sabes PN. Modeling sensorimotor learning with linear dynamical systems. *Neural 1107 Computation*. 2006;18: 760–793. doi:10.1162/089976606775774651
- 1108 22. Cheng S, Sabes PN. Calibration of visually guided reaching is driven by error-corrective 1109 learning and internal dynamics. *Journal of Neurophysiology*. American Physiological 1110 Society; 2007;97: 3057–3069. doi:10.1152/jn.00897.2006
- 1111 23. Wörgötter F, Porr B. Temporal sequence learning, prediction, and control: a review of 1112 different models and their relation to biological mechanisms. *Neural Computation*. 2005;17: 1113 245–319. doi:10.1162/0899766053011555
- 1114 24. Diedrichsen J, Hashambhoy Y, Rane T, Shadmehr R. Neural correlates of reach errors. *J 1115 Neurosci*. 2005;25: 9919–9931. doi:10.1523/JNEUROSCI.1874-05.2005
- 1116 25. Smith MA, Ghazizadeh A, Shadmehr R. Interacting adaptive processes with different 1117 timescales underlie short-term motor learning. *PLoS Biol*. 2006;4: 1035–1043. 1118 doi:10.1371/journal.pbio.0040179
- 1119 26. Vaswani PA, Shadmehr R. Decay of motor memories in the absence of error. *Journal of 1120 Neuroscience*. 2013;33: 7700–7709. doi:10.1523/JNEUROSCI.0124-13.2013
- 1121 27. Vaswani PA, Shmuelof L, Haith AM, Delnicki RJ, Huang VS, Mazzoni P, et al. Persistent 1122 residual errors in motor adaptation tasks: reversion to baseline and exploratory escape. *J 1123 Neurosci*. 2015;35: 6969–6977. doi:10.1523/JNEUROSCI.2656-14.2015
- 1124 28. Kass RE, Raftery AE. Bayes factors. *Journal of the American Statistical Association*. 1995;9: 1125 773–795. doi:10.1080/01621459.1995.10476572
- 1126 29. Jeffreys H. An Invariant Form for the Prior Probability in Estimation Problems. *Proc R Soc 1127 Lond A Math Phys Sci*. The Royal Society; 1946;186: 453–461. doi:10.2307/97883?ref=no- 1128 x-route:2f182c5222c53409df89751cc556fb6f
- 1129 30. Burge J, Ernst MO, Banks MS. The statistical determinants of adaptation rate in human 1130 reaching. *Journal of Vision*. 2008;8: 20.1–19. doi:10.1167/8.4.20
- 1131 31. Thoroughman KA, Shadmehr R. Learning of action through adaptive combination of motor 1132 primitives. *Nature*. Nature Publishing Group; 2000;407: 742–747. doi:10.1038/35037588
- 1133 32. Zarahn E, Weston GD, Liang J, Mazzoni P, Krakauer JW. Explaining savings for visuomotor 1134 adaptation: linear time-invariant state-space models are not sufficient. *Journal of 1135 Neurophysiology*. American Physiological Society; 2008;100: 2537–2548. 1136 doi:10.1152/jn.90529.2008
- 1137 33. Kawato M. Internal models for motor control and trajectory planning. *Current Opinion in 1138 Neurobiology*. 1999;9: 718–727. doi:10.1016/s0959-4388(99)00028-8
- 1139 34. Wolpert DM, Miall RC, Kawato M. Internal models in the cerebellum. *Trends Cogn Sci 1140 (Regul Ed)*. 1998;2: 338–347. doi:10.1016/S1364-6613(98)01221-2

- 1141 35. Jordan MI, Rumelhart DE. Forward Models: Supervised Learning with a Distal Teacher. 1142 Cognitive Science. 1992;16: 307–354. doi:10.1207/s15516709cog1603\_1
- 1143 36. van der Kooij K, Brenner E, van Beers RJ, Smeets JBJ. Visuomotor adaptation: how 1144 forgetting keeps us conservative. Balasubramaniam R, editor. PLoS ONE. 2015;10: 1145 e0117901. doi:10.1371/journal.pone.0117901
- 1146 37. Cameron BD, la Malla de C, López-Moliner J. Why do movements drift in the dark? Passive 1147 versus active mechanisms of error accumulation. Journal of Neurophysiology. 2015;114: 1148 390–399. doi:10.1152/jn.00032.2015
- 1149 38. Akaike H. An information criterion (AIC). Math Sci. Math Sci; 1976;14: 5–9.
- 1150 39. Akaike H. A new look at the Bayes procedure. Biometrika. 1978;65: 53–59. 1151 doi:10.1093/biomet/65.1.53
- 1152 40. Burnham KP, Anderson DR. Multimodel inference: Understanding AIC and BIC in model 1153 selection. Sociological Methods and Research. 2004;33: 261–304. 1154 doi:10.1177/0049124104268644
- 1155 41. Bozdogan H. Model selection and Akaike's Information Criterion (AIC): The general theory 1156 and its analytical extensions. Psychometrika. Second Edition. Springer-Verlag; 1987;52: 1157 345–370. doi:10.1007/BF02294361
- 1158 42. Proakis JG, Manolakis DG. Digital Signal Processing. 2007.
- 1159 43. Cassanello C, Ostendorf F, Rolfs M. Oculomotor entraining and persistent baseline drift in 1160 saccadic adaptation to a sinusoidal disturbance. Journal of Vision. The Association for 1161 Research in Vision and Ophthalmology; 2016;16: 379–379. doi:10.1167/16.12.379
- 1162 44. Cassanello C, Ostendorf F, Rolfs M. State-equation learning model for saccade adaptation. 1163 Journal of Vision. The Association for Research in Vision and Ophthalmology; 2017;17: 1164 1142–1142. doi:10.1167/17.10.1142
- 1165 45. Schwarz G. Estimating the dimension of a model. Ann Statist. Institute of Mathematical 1166 Statistics; 1978;6: 461–464. doi:10.2307/2958889?ref=search- 1167 gateway:b77d54fcff1a48c3e08bcd0ba4ebc395
- 1168 46. Pelisson D, Alahyane N, Panouillères M, Tiliqete C. Sensorimotor adaptation of saccadic 1169 eye movements. Neurosci Biobehav Rev. 2010;34: 1103–1120. 1170 doi:10.1016/j.neubiorev.2009.12.010
- 1171 47. Baddeley RJ, Ingram HA, Miall RC. System identification applied to a visuomotor task: near- 1172 optimal human performance in a noisy changing task. J Neurosci. 2003;23: 3066–3075.
- 1173 48. van Beers RJ. How Does Our Motor System Determine Its Learning Rate? PLoS ONE. 1174 2012;7: e49373. doi:10.1371/journal.pone.0049373
- 1175 49. Shadmehr R, Smith MA, Krakauer JW. Error correction, sensory prediction, and adaptation 1176 in motor control. Annu Rev Neurosci. 2010;33: 89–108. doi:10.1146/annurev-neuro-060909- 1177 153135
- 1178 50. Becker W. The neurobiology of saccadic eye movements. Metrics. Reviews of Oculomotor 1179 Research. 1989;3: 13–67.
- 1180 51. Henson DB. Corrective saccades: Effects of altering visual feedback. Vision Research. 1181 1978;18: 63–67. doi:10.1016/0042-6989(78)90078-0

- 1182 52. Wong AL, Shelhamer M. Sensorimotor adaptation error signals are derived from realistic  
1183 predictions of movement outcomes. *Journal of Neurophysiology*. 2011;105: 1130–1140.  
1184 doi:10.1152/jn.00394.2010
- 1185 53. Collins T, Rolfs M, Deubel H, Cavanagh P. Post-saccadic location judgments reveal  
1186 remapping of saccade targets to non-foveal locations. *Journal of Vision*. 2009;9: 29.1–9.  
1187 doi:10.1167/9.5.29
- 1188 54. Golla H, Tziridis K, Haarmeier T, Catz N, Barash S, Thier P. Reduced saccadic resilience  
1189 and impaired saccadic adaptation due to cerebellar disease. *Eur J Neurosci*. 2008;27: 132–  
1190 144. doi:10.1111/j.1460-9568.2007.05996.x
- 1191 55. Herzfeld DJ, Kojima Y, Soetedjo R, Shadmehr R. Encoding of action by the Purkinje cells of  
1192 the cerebellum. *Nature*. 2015;526: 439–442. doi:10.1038/nature15693
- 1193 56. Herzfeld DJ, Kojima Y, Soetedjo R, Shadmehr R. Sensory prediction errors during saccade  
1194 adaptation drive cerebellar complex spikes and learning. Program No 715.16 Neuroscience  
1195 Planner, San Diego, CA: Society for Neuroscience, Online, 2016. pp. 1–1.
- 1196 57. Herzfeld DJ, Kojima Y, Soetedjo R, Shadmehr R. Encoding of error and learning to correct  
1197 that error by the Purkinje cells of the cerebellum. *Nat Neurosci*. Nature Publishing Group;  
1198 2018;21: 736–743. doi:10.1038/s41593-018-0136-y
- 1199 58. Junker M, Endres D, Sun ZP, Dicke PW, Giese M, Thier P. Learning from the past: A  
1200 reverberation of past errors in the cerebellar climbing fiber signal. *PLoS Biol*. 2018;16:  
1201 e2004344. doi:10.1371/journal.pbio.2004344
- 1202 59. Rössert C, Dean P, Porrill J. At the Edge of Chaos: How Cerebellar Granular Layer Network  
1203 Dynamics Can Provide the Basis for Temporal Filters. Graham LJ, editor. *PLoS Comput  
1204 Biol*. Public Library of Science; 2015;11: e1004515. doi:10.1371/journal.pcbi.1004515
- 1205 60. Kalidindi HT, George Thuruthel T, Laschi C, Falotico E. Modeling the Encoding of Saccade  
1206 Kinematic Metrics in the Purkinje Cell Layer of the Cerebellar Vermis. *Front Comput  
1207 Neurosci*. 2019;12: 293. doi:10.3389/fncom.2018.00108
- 1208 61. Miall RC, Weir DJ, Wolpert DM, Stein JF. Is the cerebellum a smith predictor? *J Mot Behav*.  
1209 1993;25: 203–216. doi:10.1080/00222895.1993.9942050
- 1210 62. Miall RC, Wolpert DM. Forward models for physiological motor control. *Neural Networks*.  
1211 1996;9: 1265–1279. doi:10.1016/S0893-6080(96)00035-4
- 1212 63. Miall RC, Wolpert DM. The Cerebellum as a Predictive Model of the Motor System: A Smith  
1213 Predictor Hypothesis. *Neural Control of Movement*. Boston, MA: Springer, Boston, MA;  
1214 1995. pp. 215–223. doi:10.1007/978-1-4615-1985-0\_27
- 1215 64. Kojima Y, Iwamoto Y, Yoshida K. Memory of Learning Facilitates Saccadic Adaptation in the  
1216 Monkey. *J Neurosci*. 2004;24: 7531–7539. doi:10.1523/JNEUROSCI.1741-04.2004
- 1217 65. Herzfeld DJ, Vaswani PA, Marko MK, Shadmehr R. A memory of errors in sensorimotor  
1218 learning. *Science*. 2014;345: 1349–1353. doi:10.1126/science.1253138
- 1219 66. Körding KP, Tenenbaum JB, Shadmehr R. The dynamics of memory as a consequence of  
1220 optimal adaptation to a changing body. *Nat Neurosci*. 2007;10: 779–786.  
1221 doi:10.1038/nn1901
- 1222 67. Robinson FR, Soetedjo R, Noto C. Distinct Short-Term and Long-Term Adaptation to  
1223 Reduce Saccade Size in Monkey. *Journal of Neurophysiology*. 2006;96: 1030–1041.  
1224 doi:10.1152/jn.01151.2005

- 1225 68. Havermann K, Lappe M. The influence of the consistency of postsaccadic visual errors on  
1226 saccadic adaptation. *Journal of Neurophysiology*. 2010;103: 3302–3310.  
1227 doi:10.1152/jn.00970.2009
- 1228 69. Gonzalez Castro LN, Hadjiosif AM, Hemphill MA, Smith MA. Environmental consistency  
1229 determines the rate of motor adaptation. *Curr Biol*. 2014;24: 1050–1061.  
1230 doi:10.1016/j.cub.2014.03.049
- 1231 70. Wong AL, Shelhamer M. Saccade adaptation improves in response to a gradually  
1232 introduced stimulus perturbation. *Neurosci Lett*. 2011;500: 207–211.  
1233 doi:10.1016/j.neulet.2011.06.039
- 1234 71. Huberdeau DM, Krakauer JW, Haith AM. Dual-process decomposition in human  
1235 sensorimotor adaptation. *Current Opinion in Neurobiology*. 2015;33: 71–77.  
1236 doi:10.1016/j.conb.2015.03.003
- 1237 72. Huang VS, Haith A, Mazzoni P, Krakauer JW. Rethinking Motor Learning and Savings in  
1238 Adaptation Paradigms: Model-Free Memory for Successful Actions Combines with Internal  
1239 Models. *Neuron*. 2011;70: 787–801. doi:10.1016/j.neuron.2011.04.012
- 1240 73. Mazzoni P, Krakauer JW. An implicit plan overrides an explicit strategy during visuomotor  
1241 adaptation. *J Neurosci*. 2006;26: 3642–3645. doi:10.1523/JNEUROSCI.5317-05.2006
- 1242 74. Haith AM, Krakauer JW. Model-Based and Model-Free Mechanisms of Human Motor  
1243 Learning. *Advances in Experimental Medicine and Biology*. 2013. pp. 1–21.  
1244 doi:10.1007/978-1-4614-5465-6\_1
- 1245 75. Chaisanguanthum KS, Shen HH, Sabes PN. Motor variability arises from a slow random  
1246 walk in neural state. *J Neurosci*. 2014;34: 12071–12080. doi:10.1523/JNEUROSCI.3001-  
1247 13.2014
- 1248 76. Kojima Y, Soetedjo R. Elimination of the error signal in the superior colliculus impairs  
1249 saccade motor learning. *Proc Natl Acad Sci USA. National Academy of Sciences*; 2018;115:  
1250 E8987–E8995. doi:10.1073/pnas.1806215115
- 1251 77. Xu-Wilson M, Chen-Harris H, Zee DS, Shadmehr R. Cerebellar Contributions to Adaptive  
1252 Control of Saccades in Humans. *Journal of Neuroscience*. 2009;29: 12930–12939.  
1253 doi:10.1523/JNEUROSCI.3115-09.2009
- 1254 78. Ritz H, Nassar MR, Frank MJ, Shenhav A. A Control Theoretic Model of Adaptive Learning  
1255 in Dynamic Environments. *J Cogn Neurosci*. 2018;: 1–17. doi:10.1162/jocn\_a\_01289
- 1256 79. Dash S, Thier P. Cerebellum-Dependent Motor Learning: Lessons from Adaptation of Eye  
1257 Movements in Primates. *Prog Brain Res. Elsevier*; 2014;210: 121–155. doi:10.1016/B978-0-  
1258 444-63356-9.00006-6
- 1259 80. Rigoux L, Guigon E. A Model of Reward- and Effort-Based Optimal Decision Making and  
1260 Motor Control. *PLoS Comput Biol*. 2012;8. doi:10.1371/journal.pcbi.1002716
- 1261 81. Ritz H, Nassar MR, Frank MJ, Shenhav A. A Control Theoretic Model of Adaptive Learning  
1262 in Dynamic Environments. *J Cogn Neurosci*. 2018;: 1–17. doi:10.1162/jocn\_a\_01289
- 1263 82. Thakkar KN, Diwadkar VA, Rolfs M. Oculomotor Prediction: A Window into the Psychotic  
1264 Mind. *Trends Cogn Sci (Regul Ed)*. 2017;21: 344–356. doi:10.1016/j.tics.2017.02.001
- 1265 83. Rösler L, Rolfs M, van der Stigchel S, Neggers SFW, Cahn W, Kahn RS, et al. Failure to  
1266 use corollary discharge to remap visual target locations is associated with psychotic

- 1267 symptom severity in schizophrenia. *Journal of Neurophysiology. American Physiological*  
1268 *Society*; 2015;114: 1129–1136. doi:10.1152/jn.00155.2015
- 1269 84. Muhammed K, Manohar S, Ben Yehuda M, Chong TTJ, Tofaris G, Lennox G, et al. Reward  
1270 sensitivity deficits modulated by dopamine are associated with apathy in Parkinson's  
1271 disease. *Brain*. 2016;139: 2706–2721. doi:10.1093/brain/aww188
- 1272 85. Manohar SG, Chong TTJ, Apps MAJ, Batla A, Stamelou M, Jarman PR, et al. Reward Pays  
1273 the Cost of Noise Reduction in Motor and Cognitive Control. *Curr Biol*. 2015;25: 1707–1716.  
1274 doi:10.1016/j.cub.2015.05.038
- 1275 86. Heinzle J, Aponte EA, Stephan KE. Computational models of eye movements and their  
1276 application to schizophrenia. *Current Opinion in Behavioral Sciences*. 2016;11: 21–29.  
1277 doi:10.1016/j.cobeha.2016.03.008
- 1278



**a** ORIG: Two-way adaptation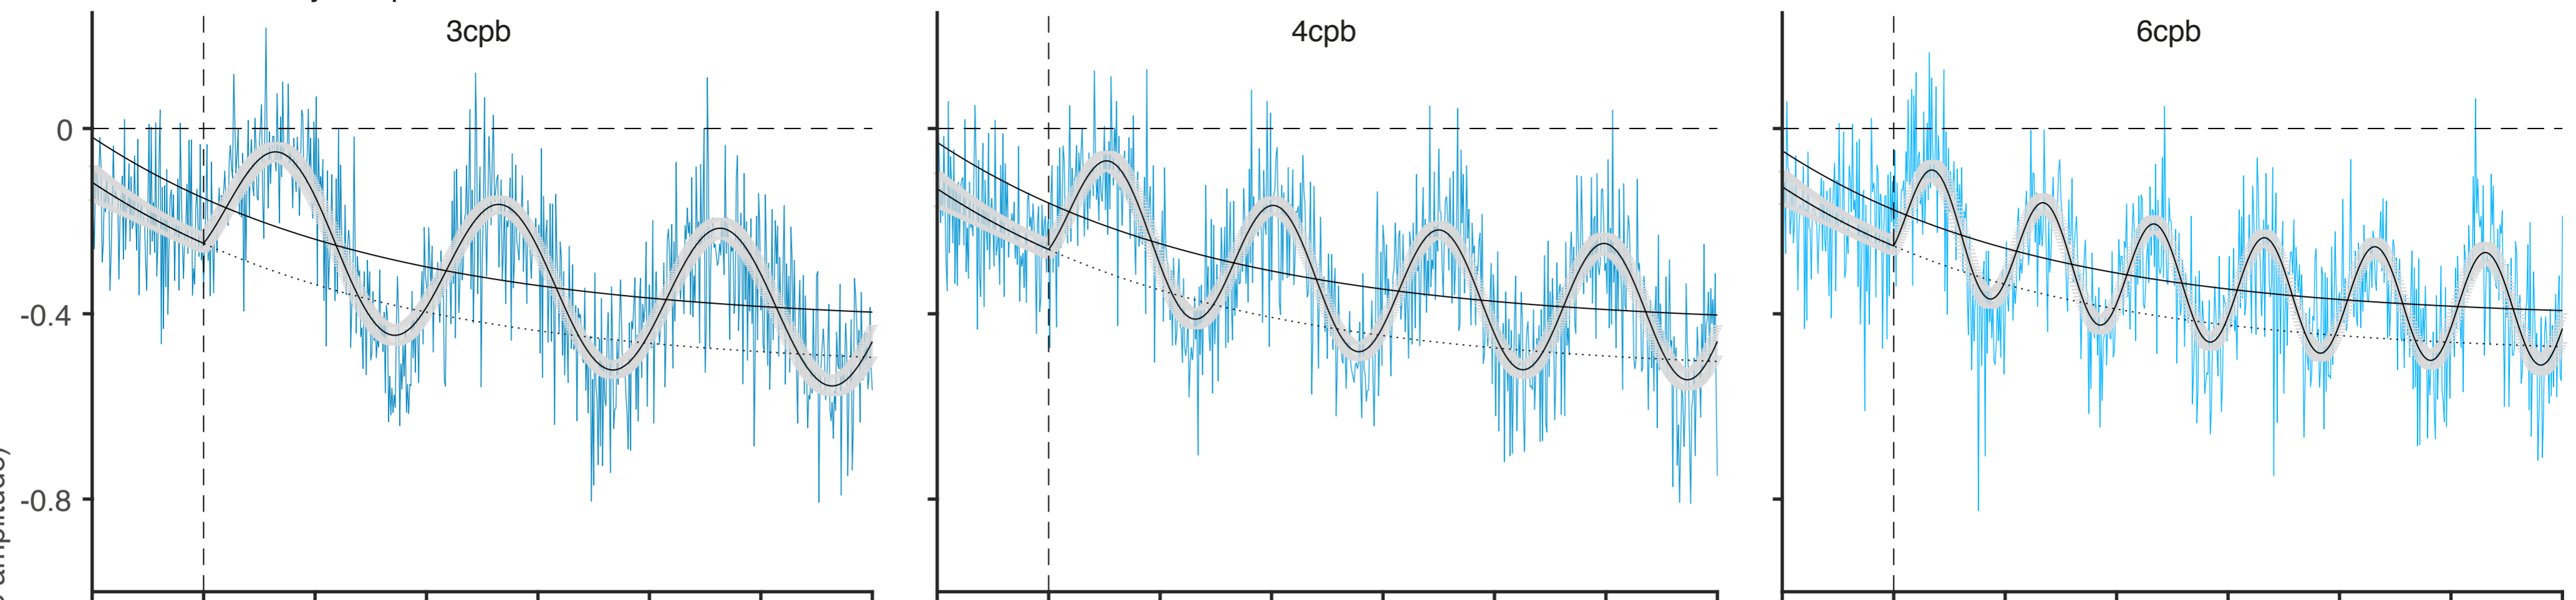**b** ORIG: Global adaptation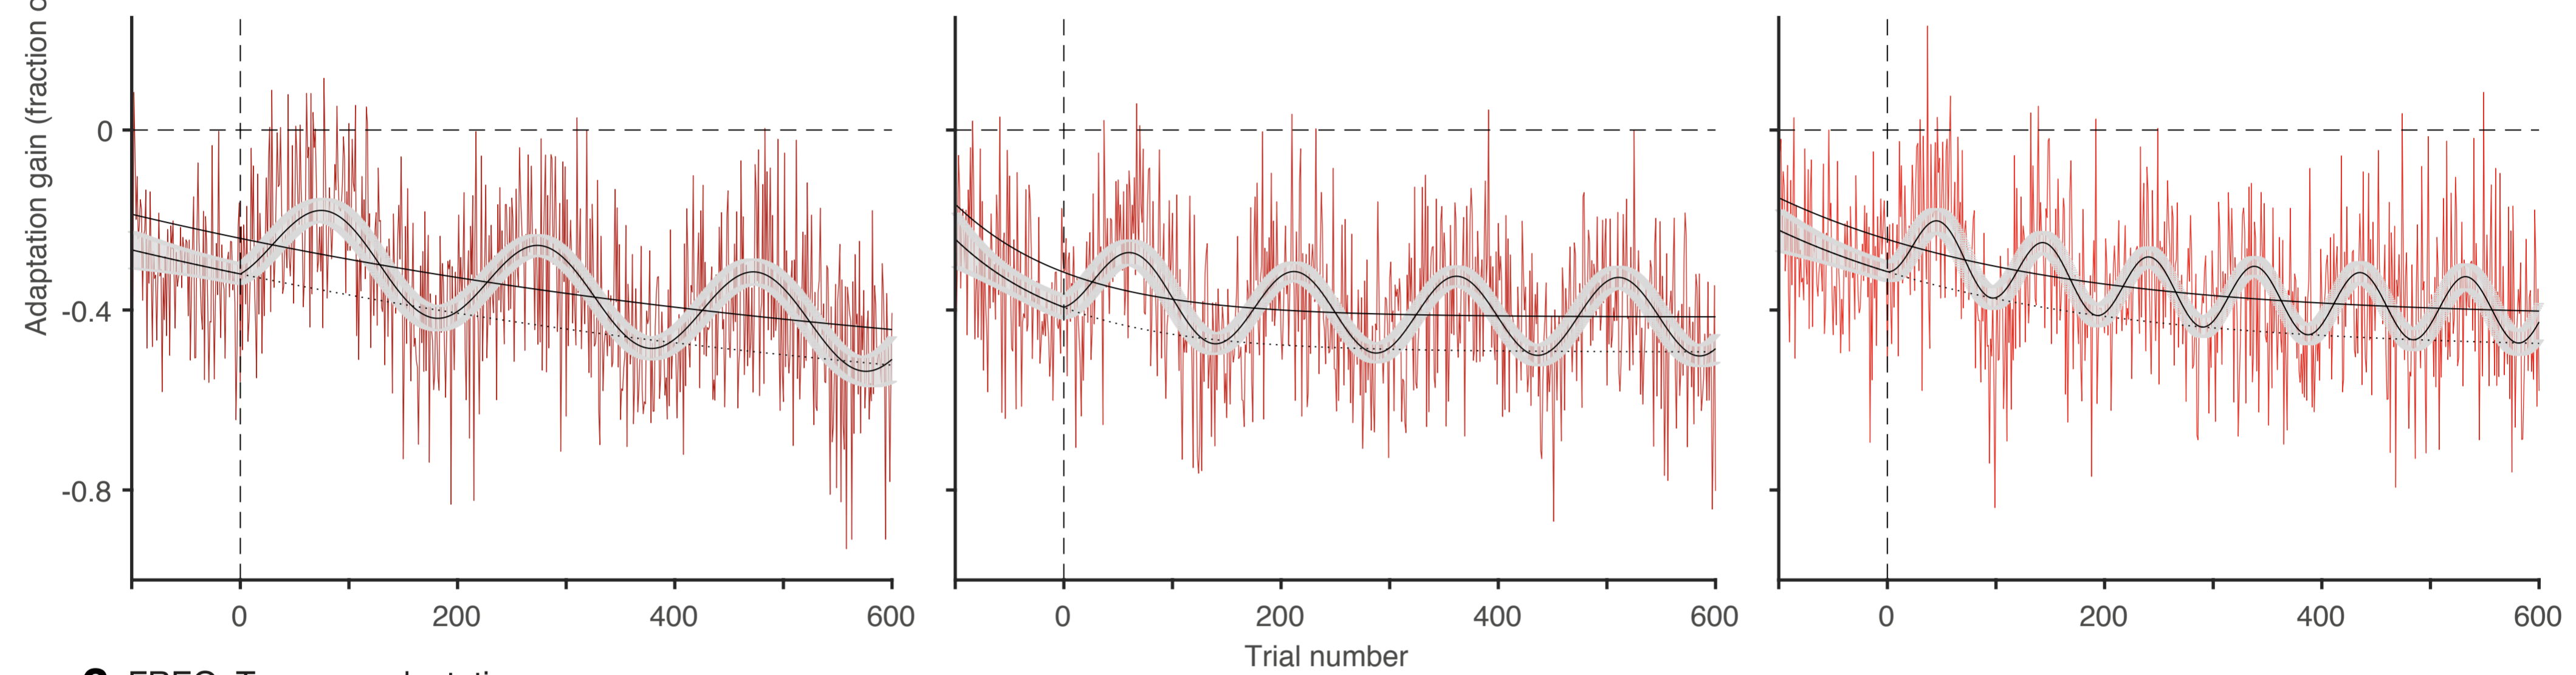**c** FREQ: Two-way adaptation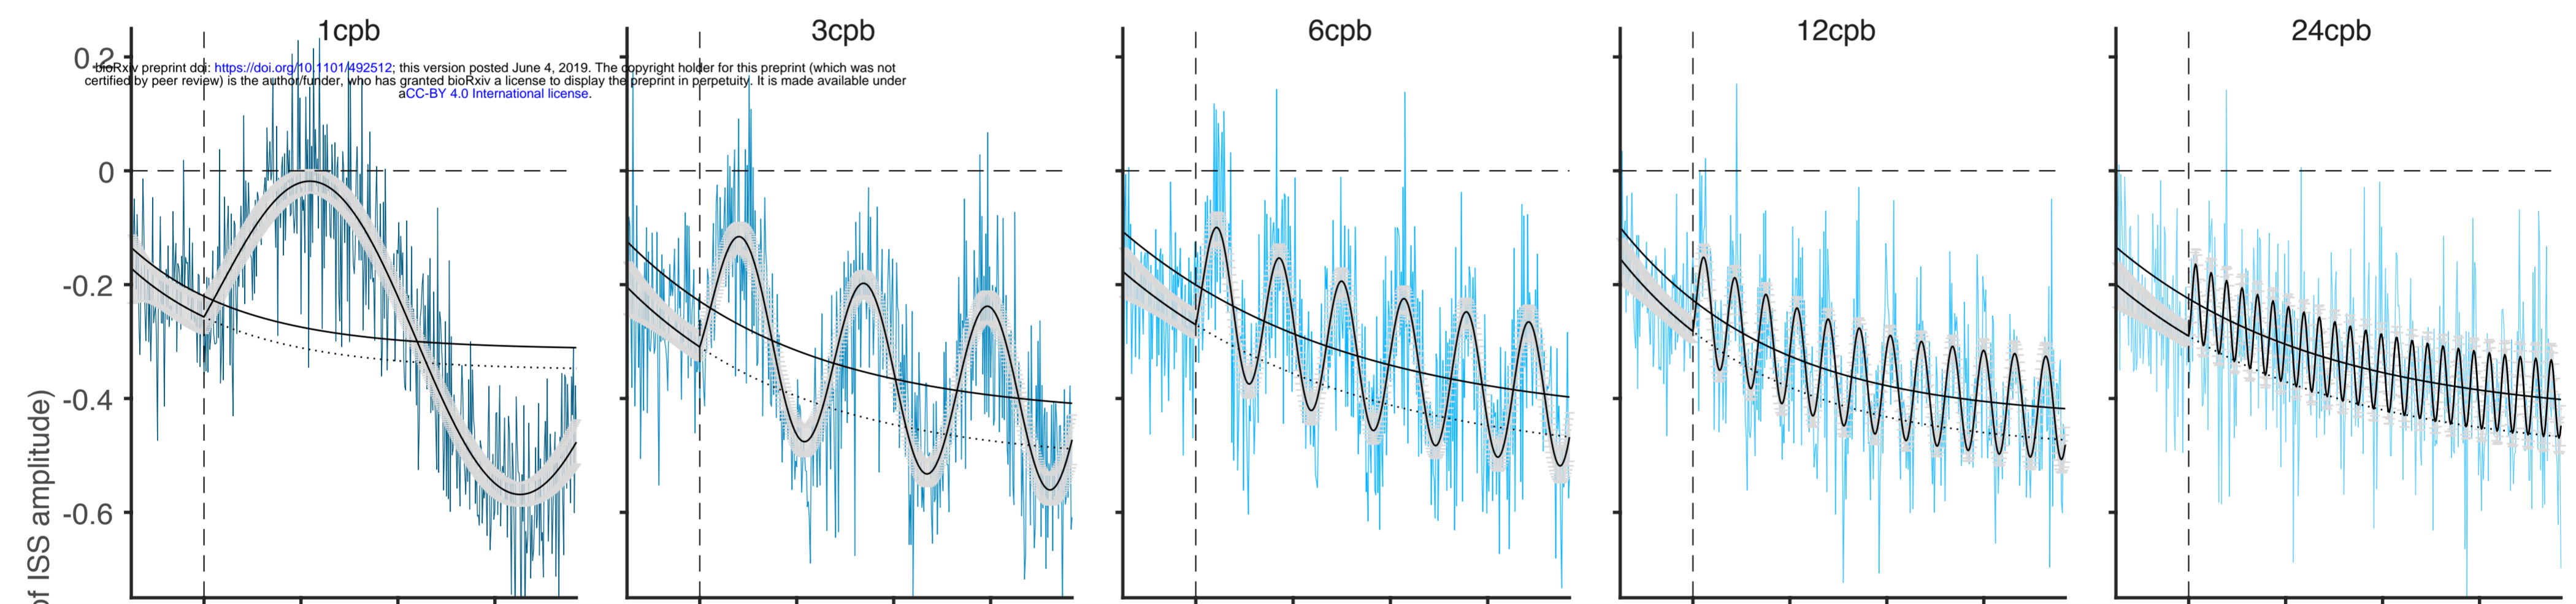**d** FREQ: Global adaptation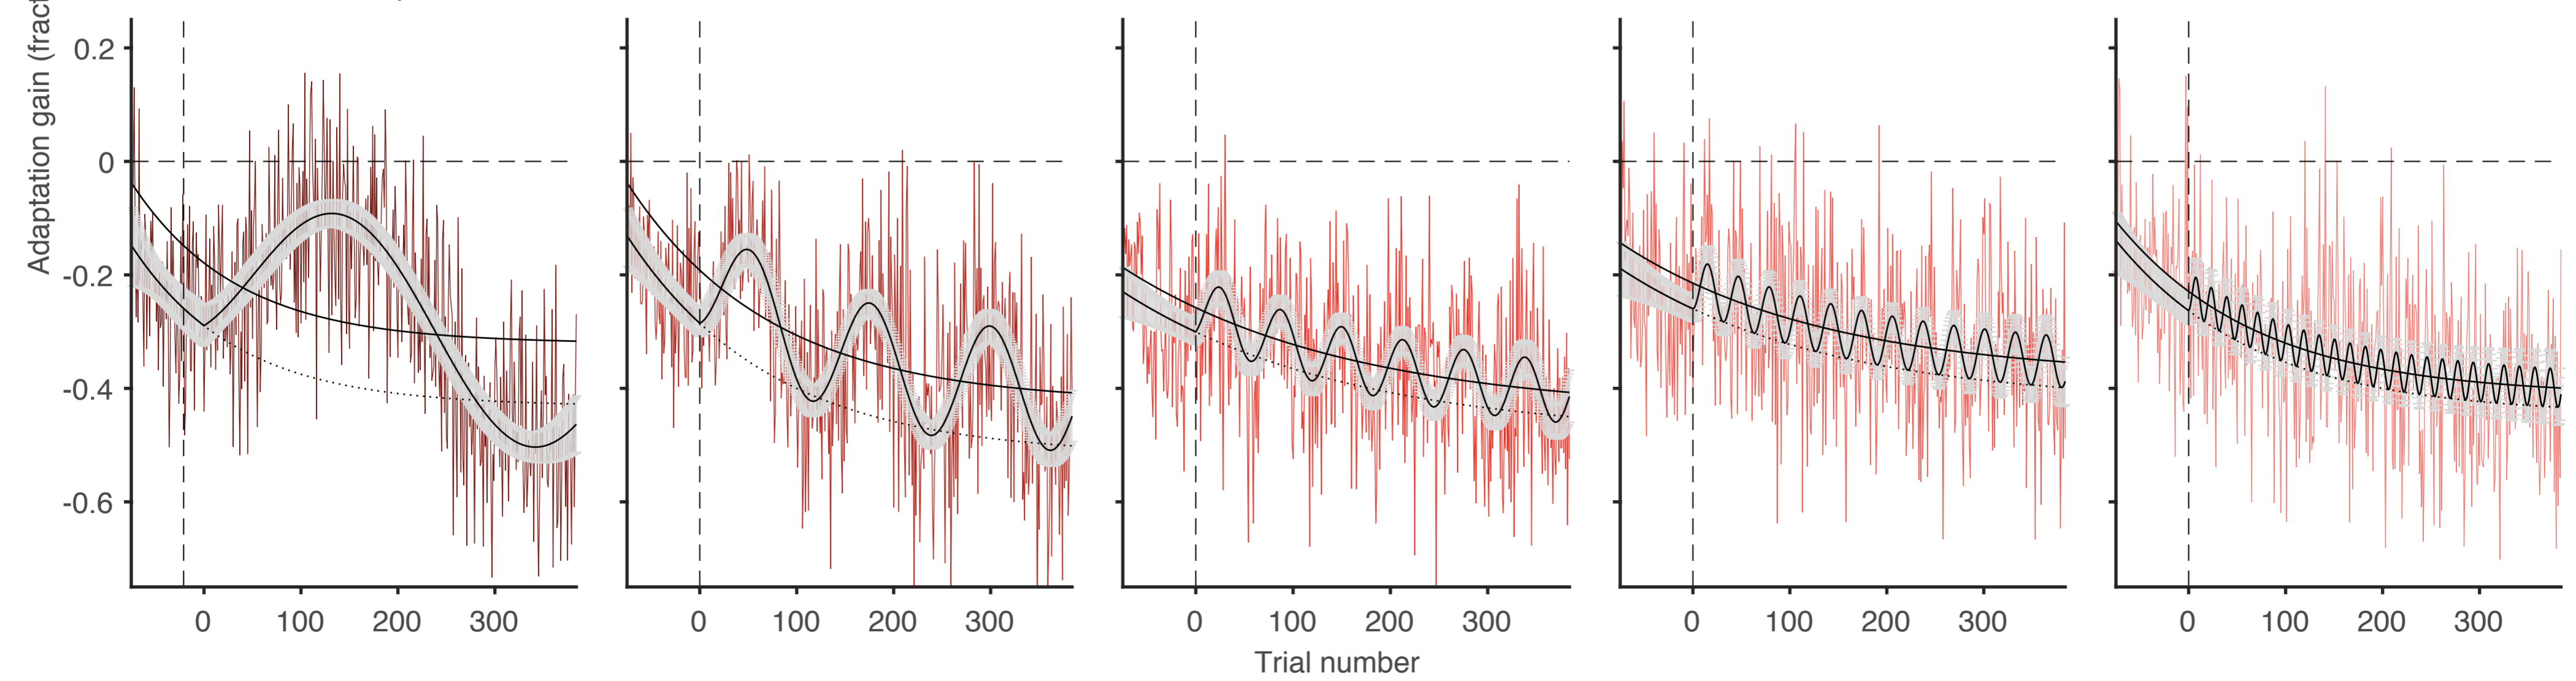

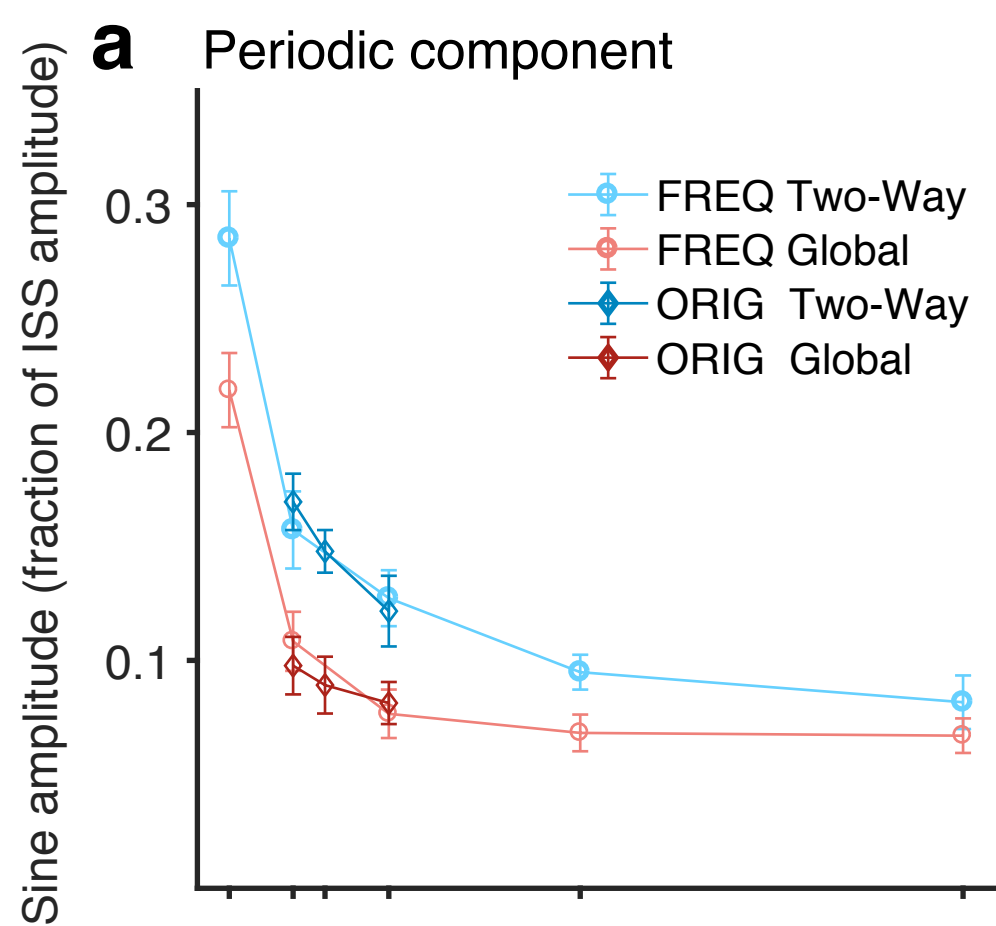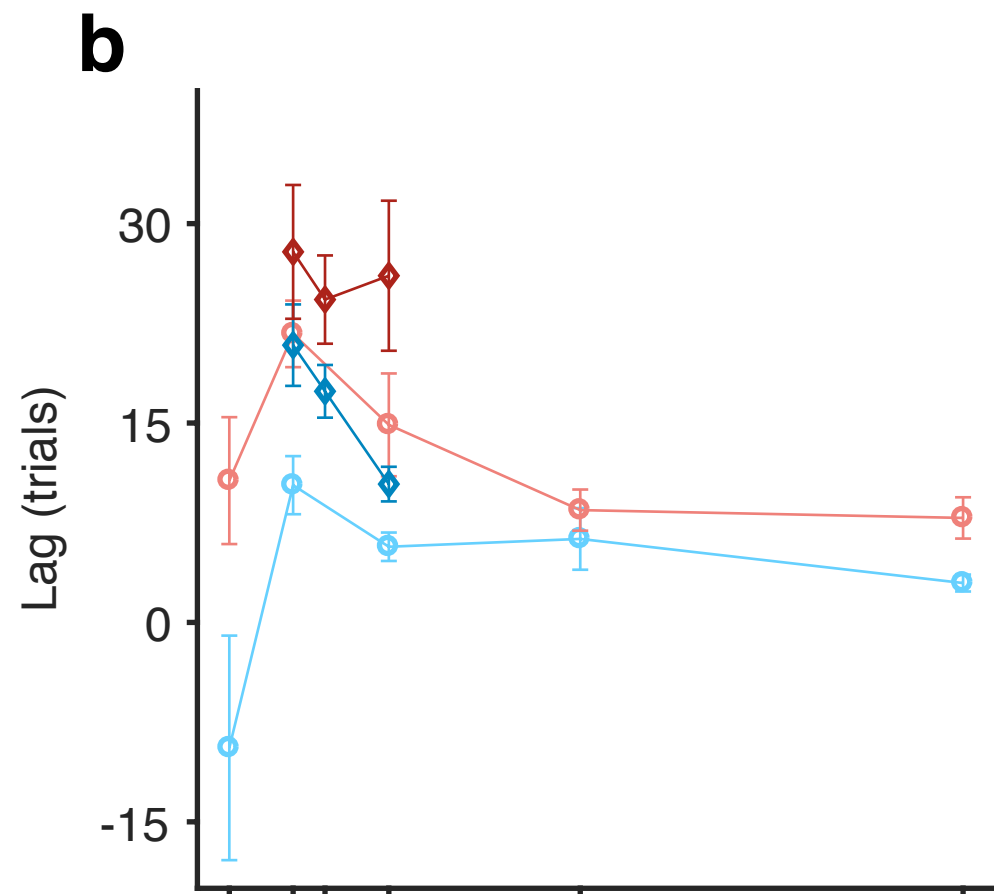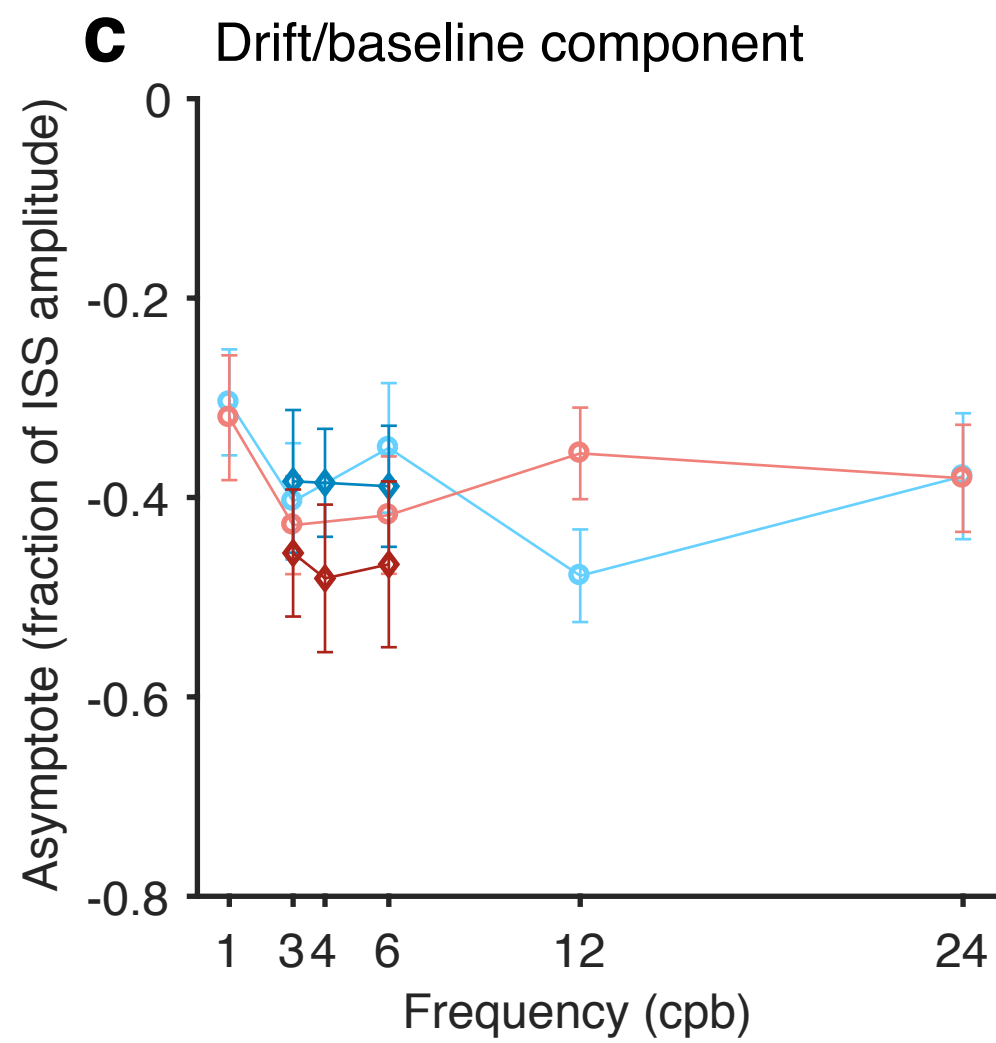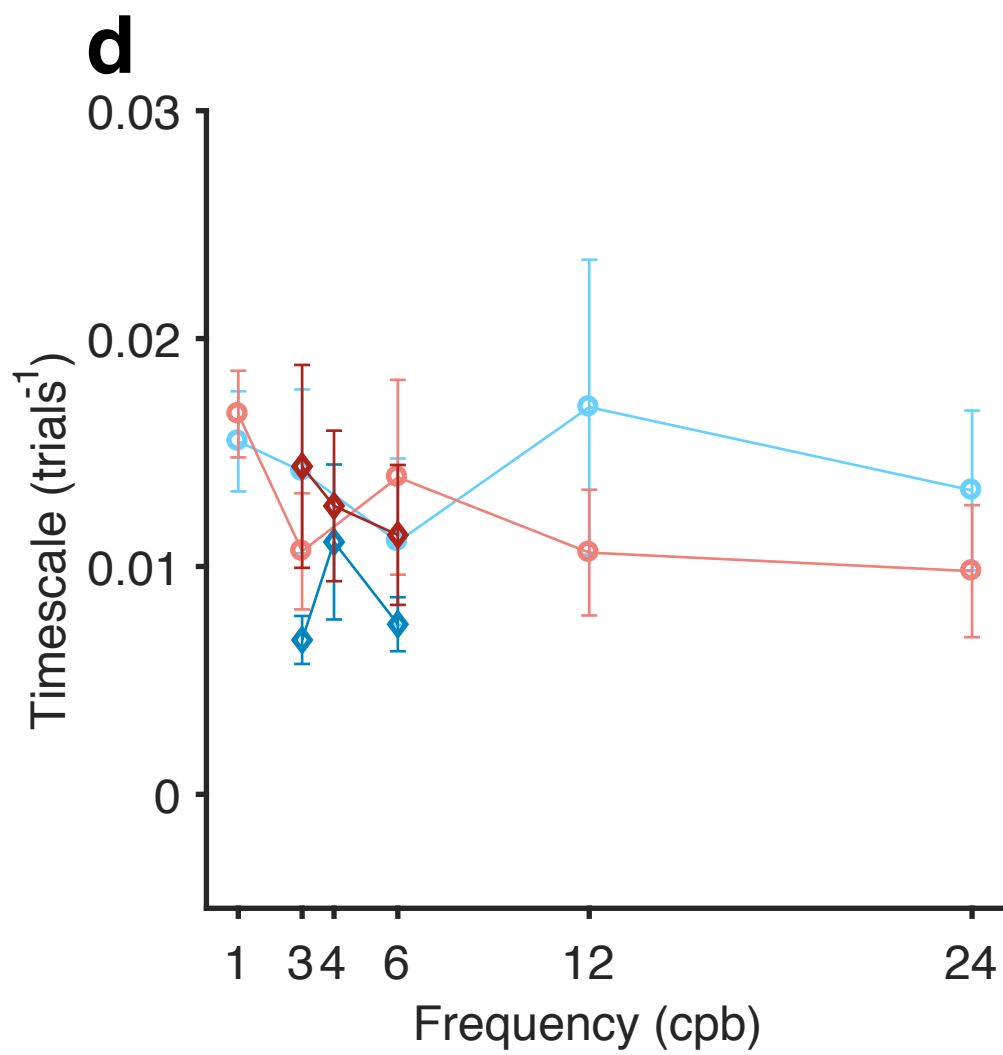

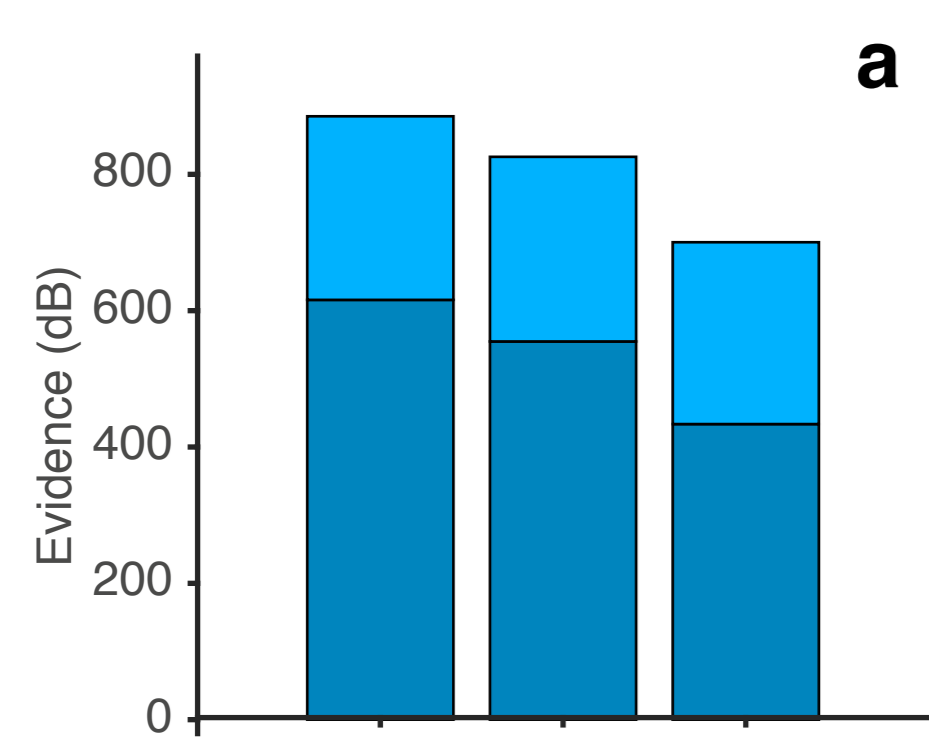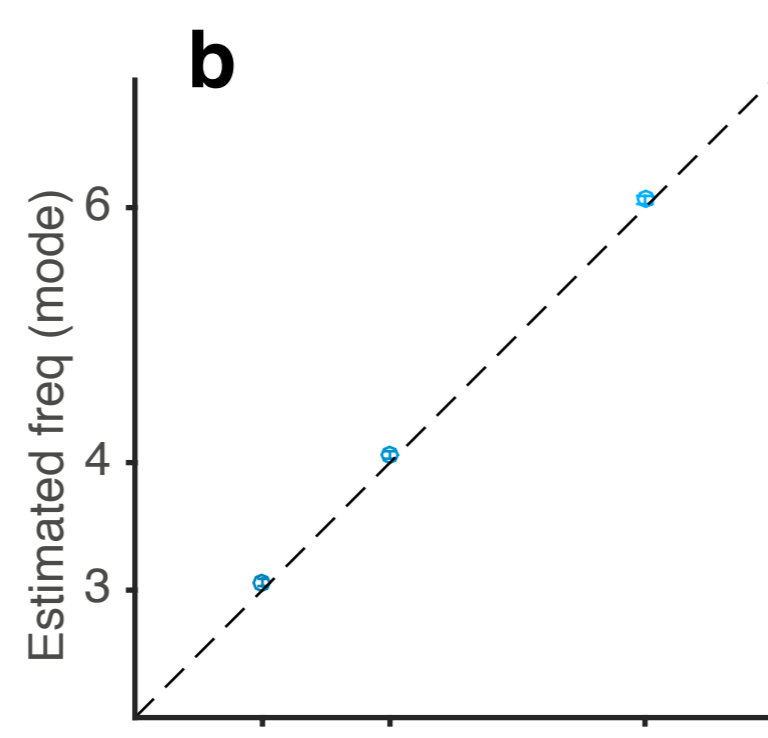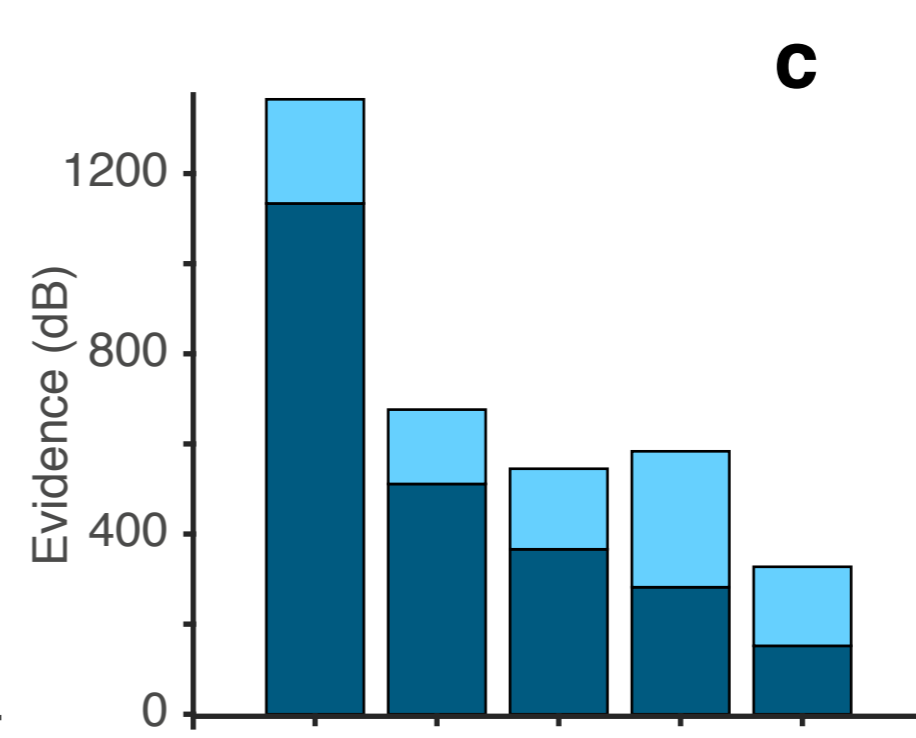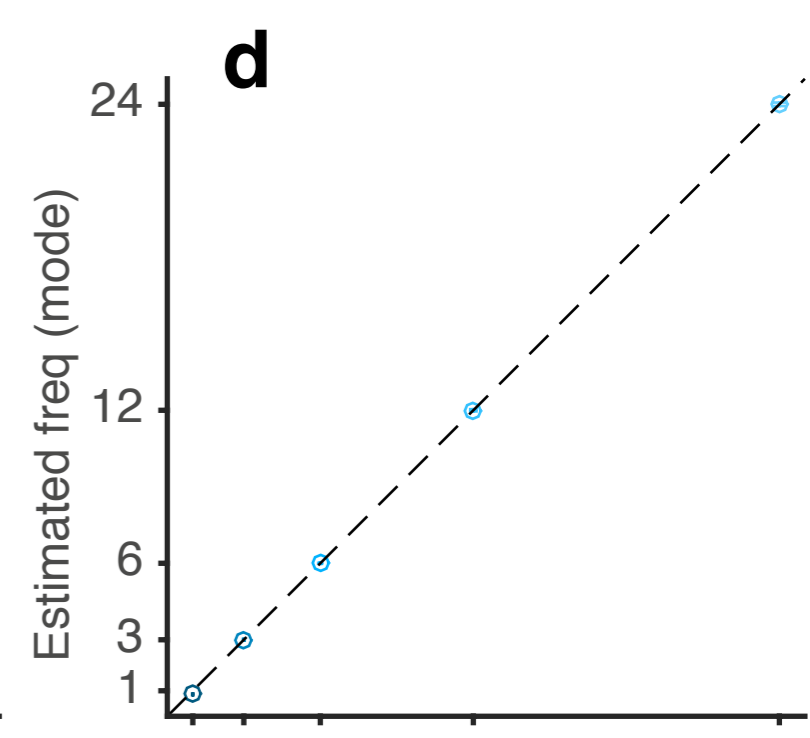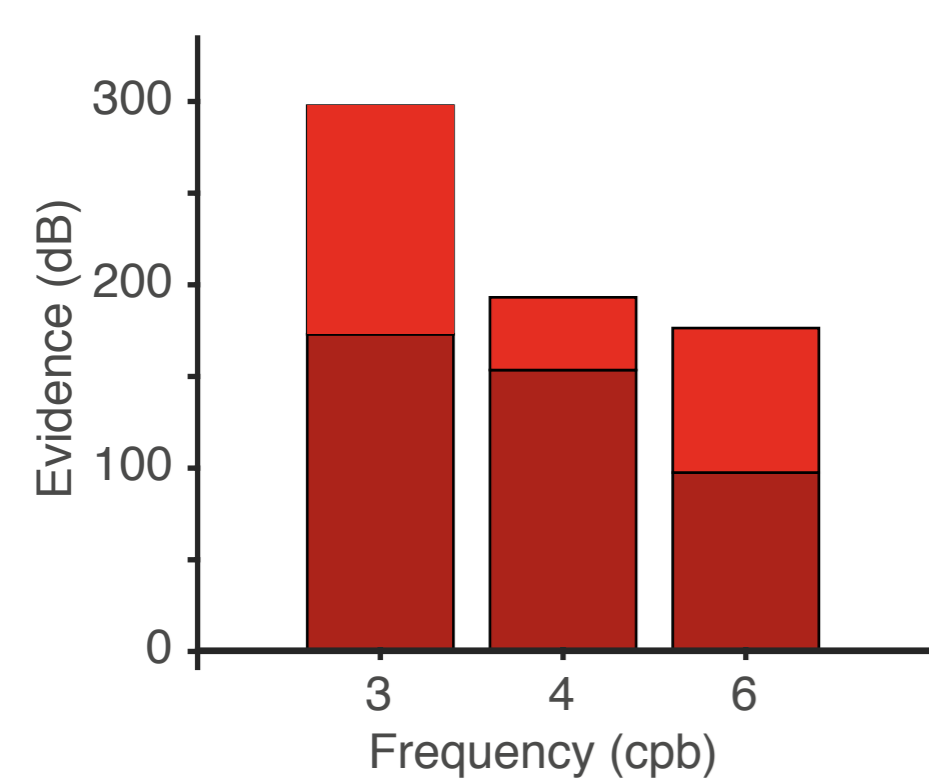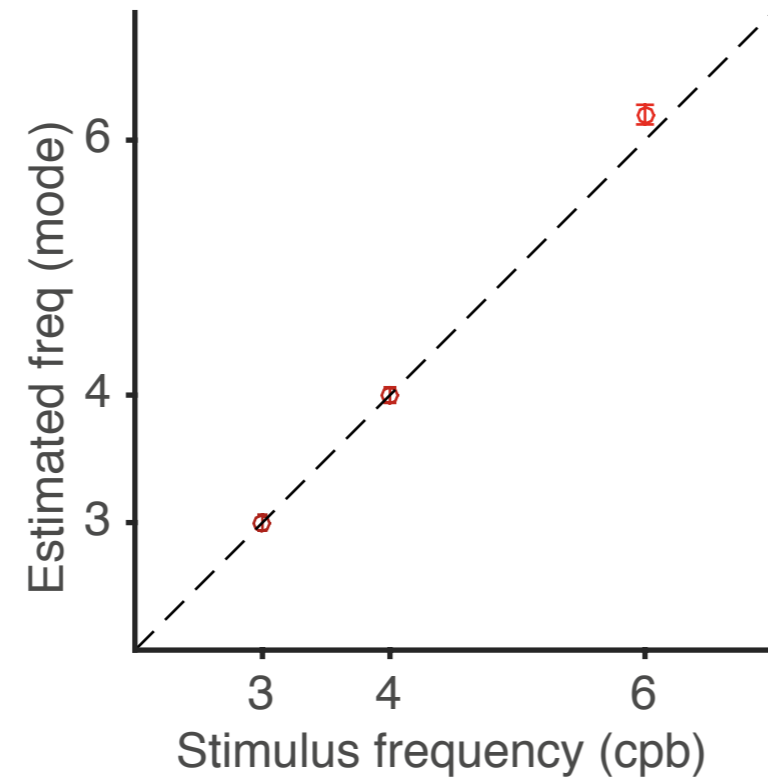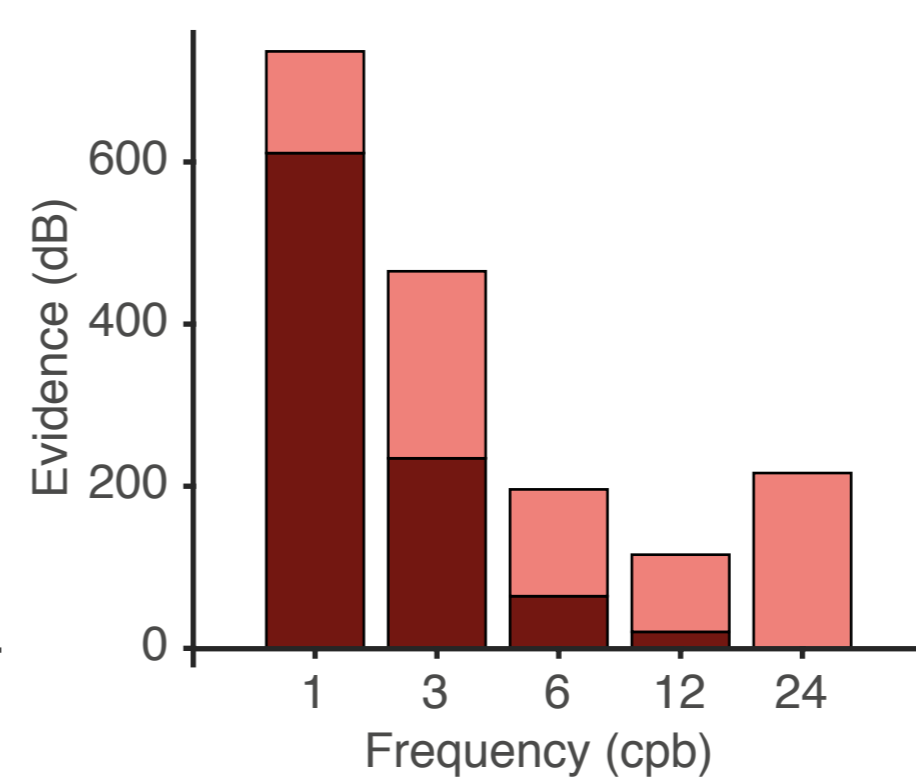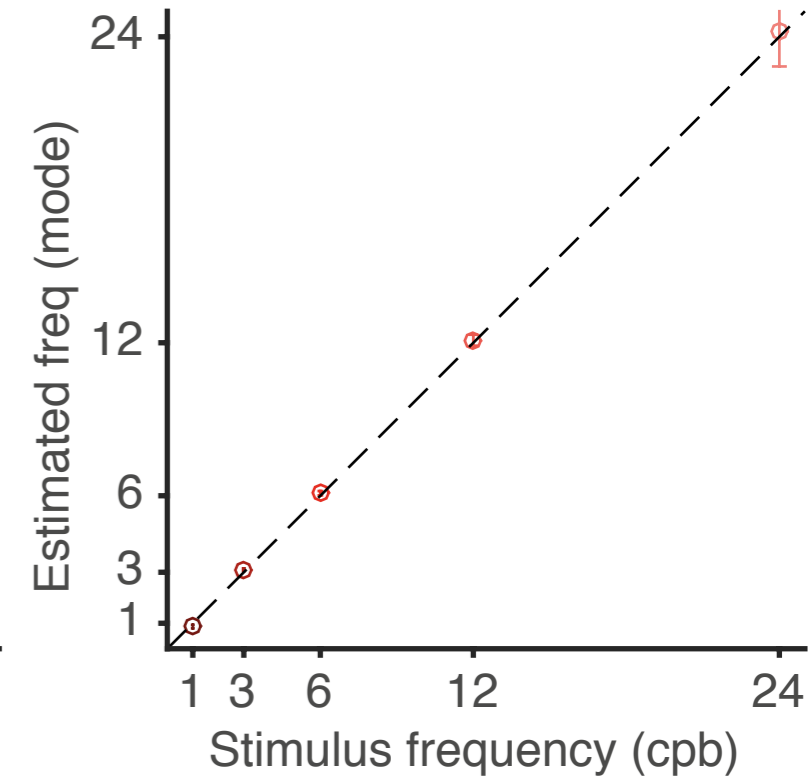

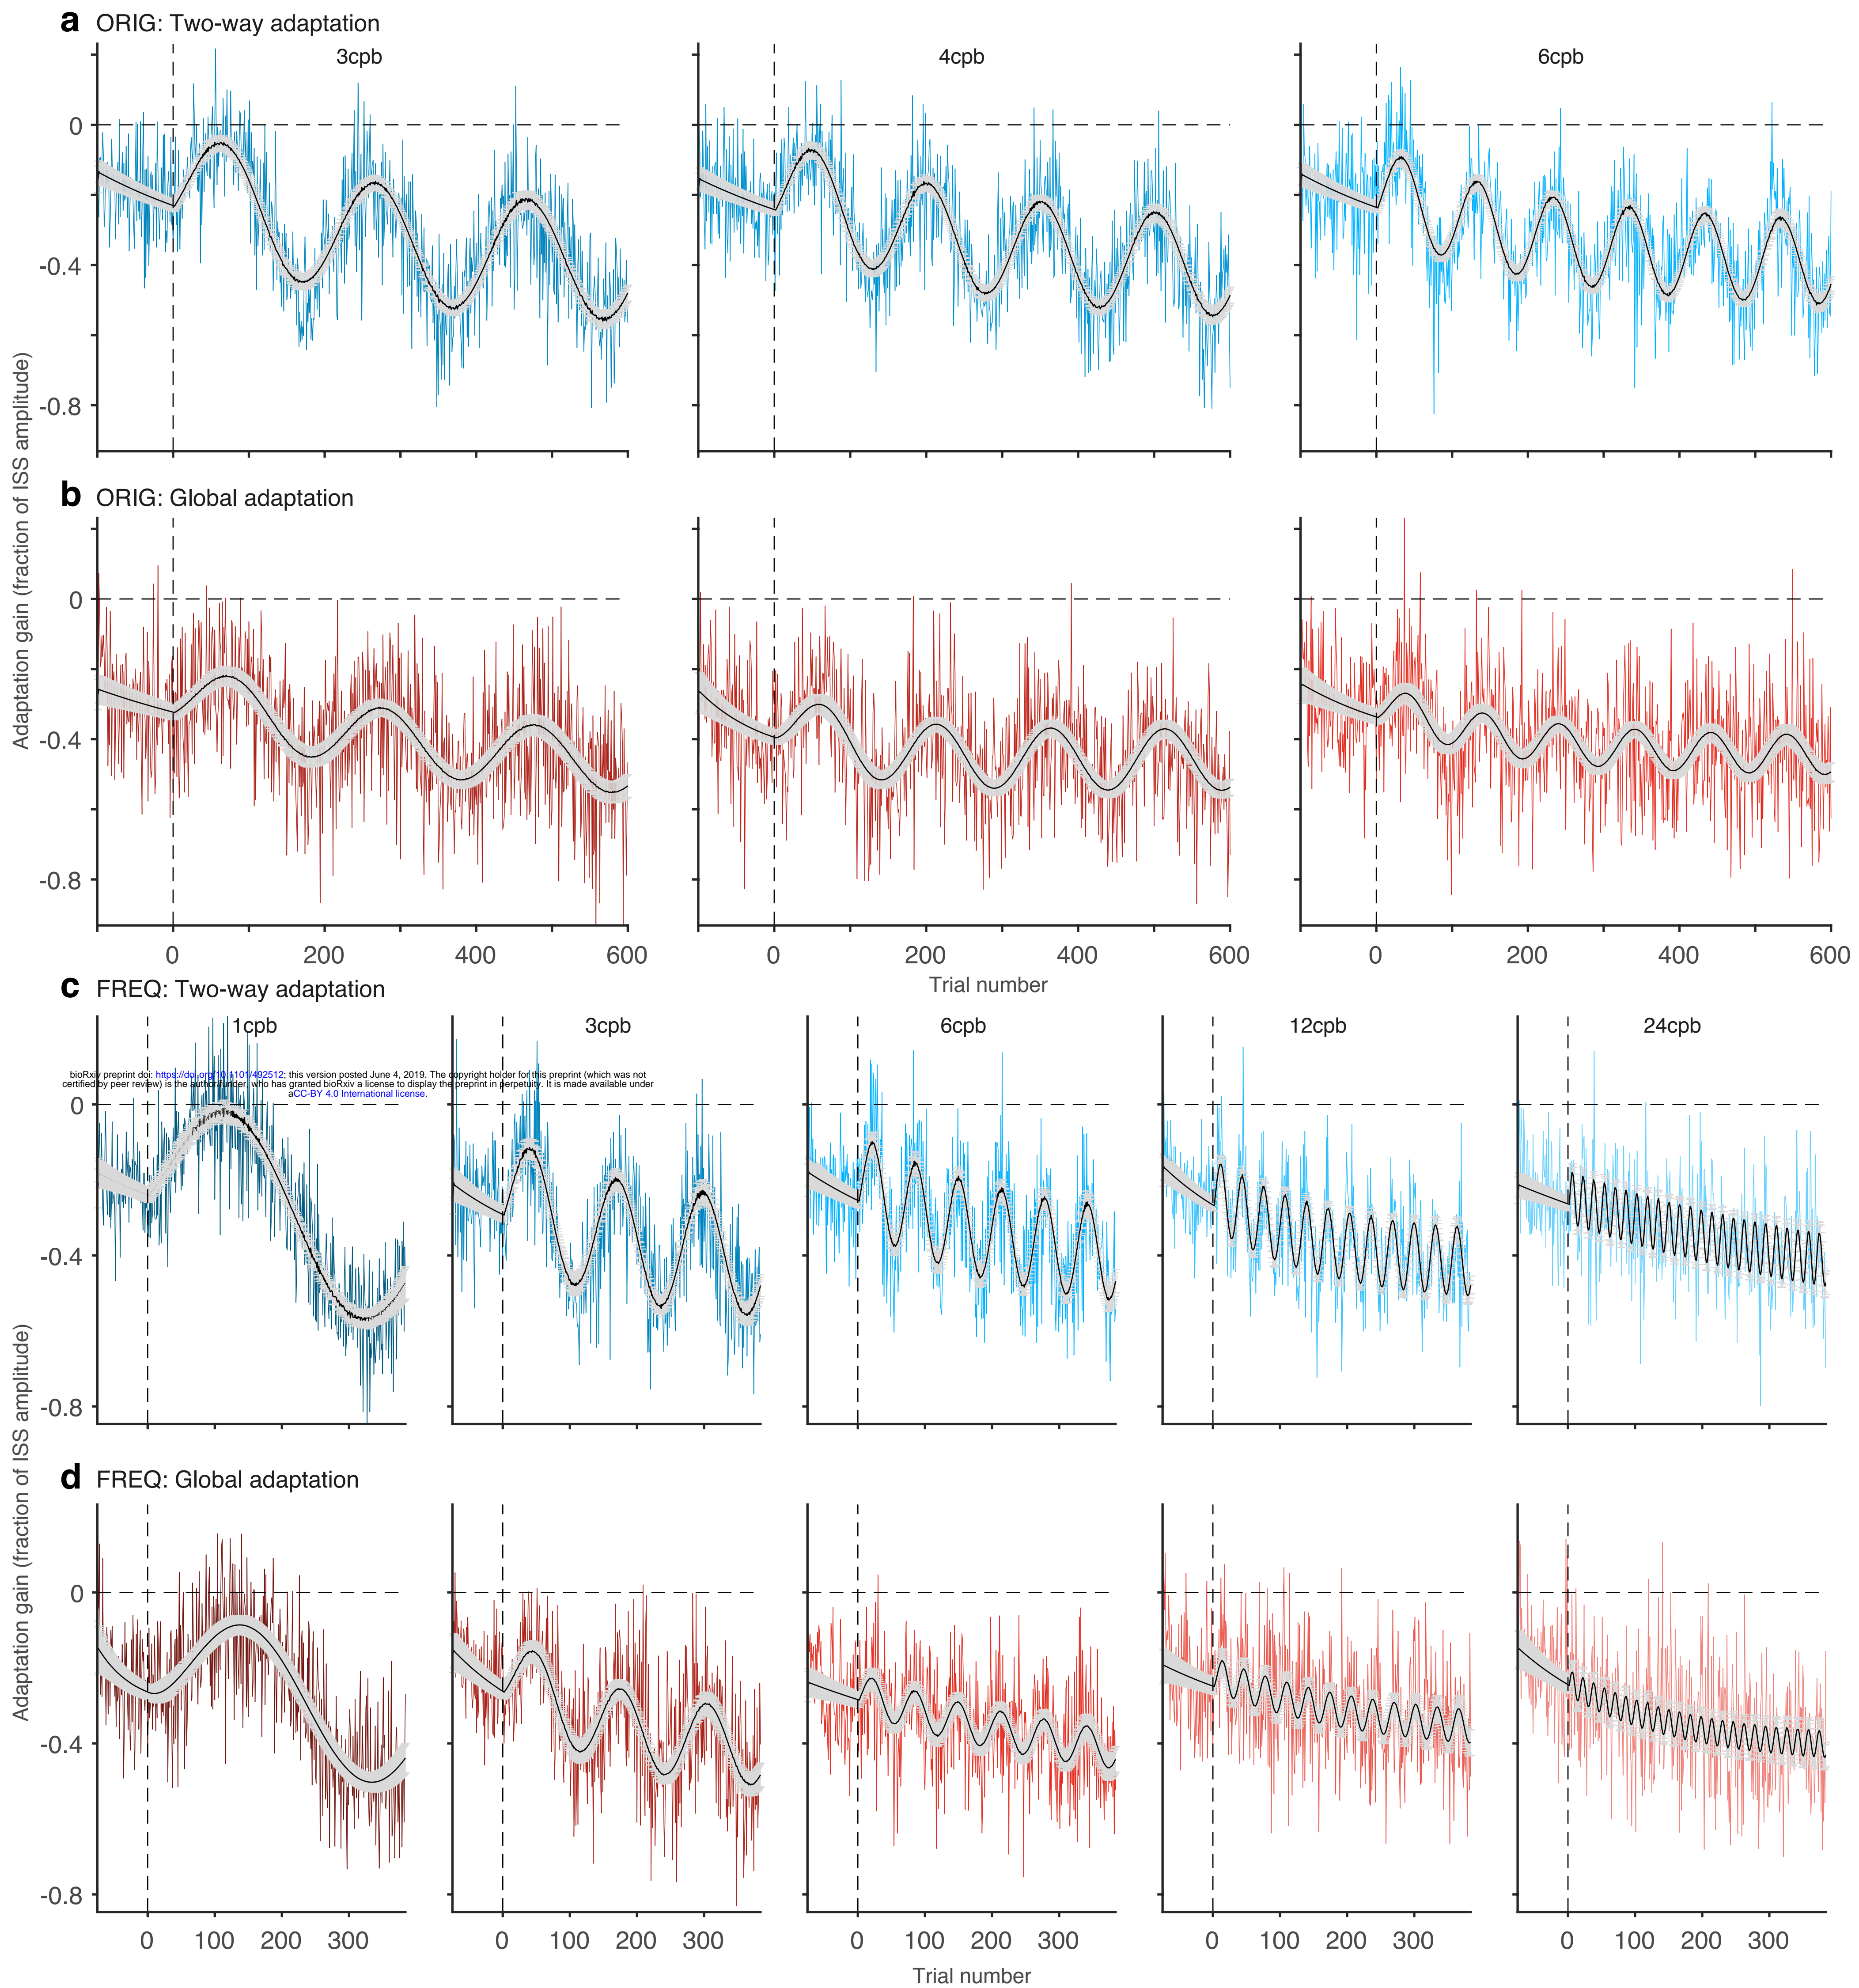

# ORIG

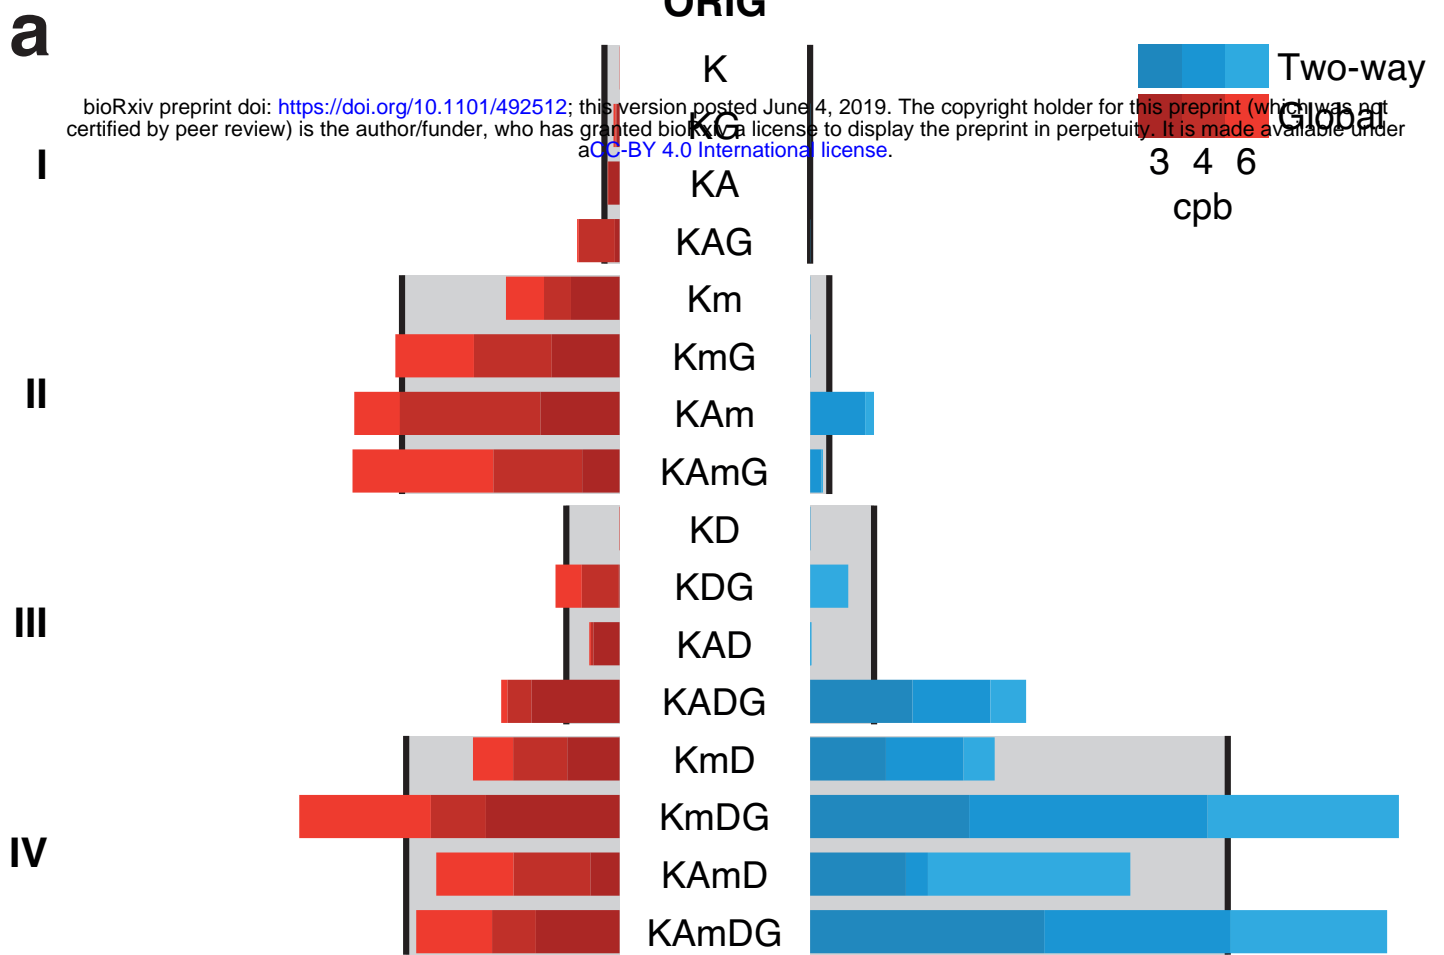

# FREQ

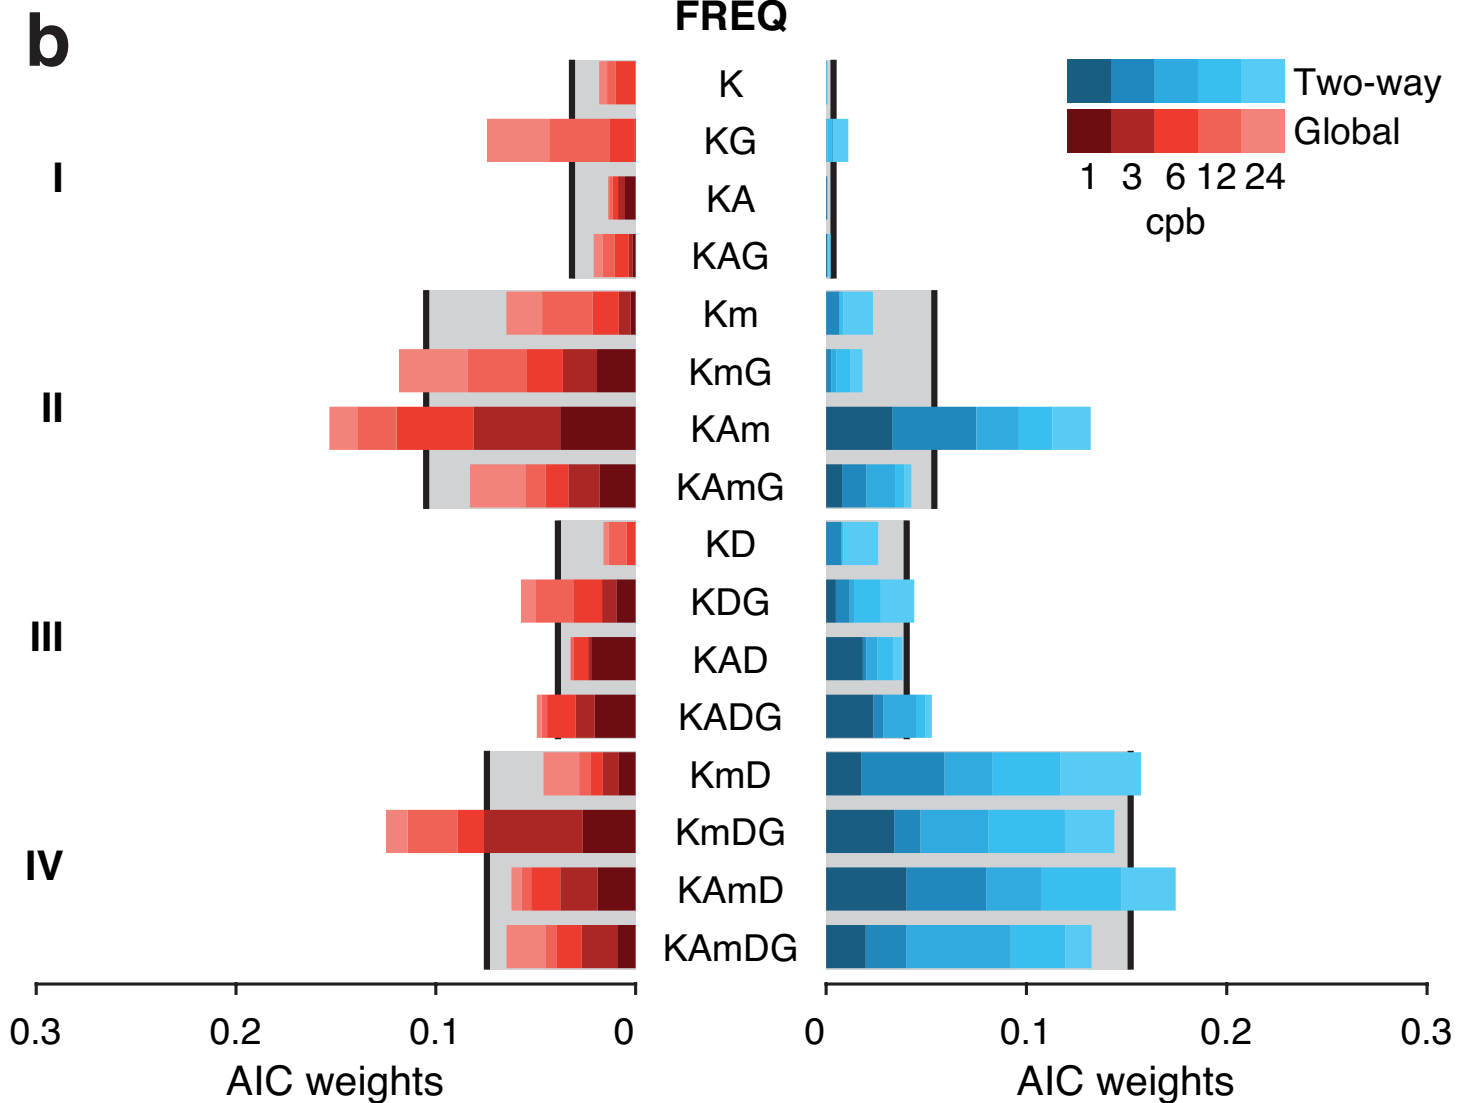

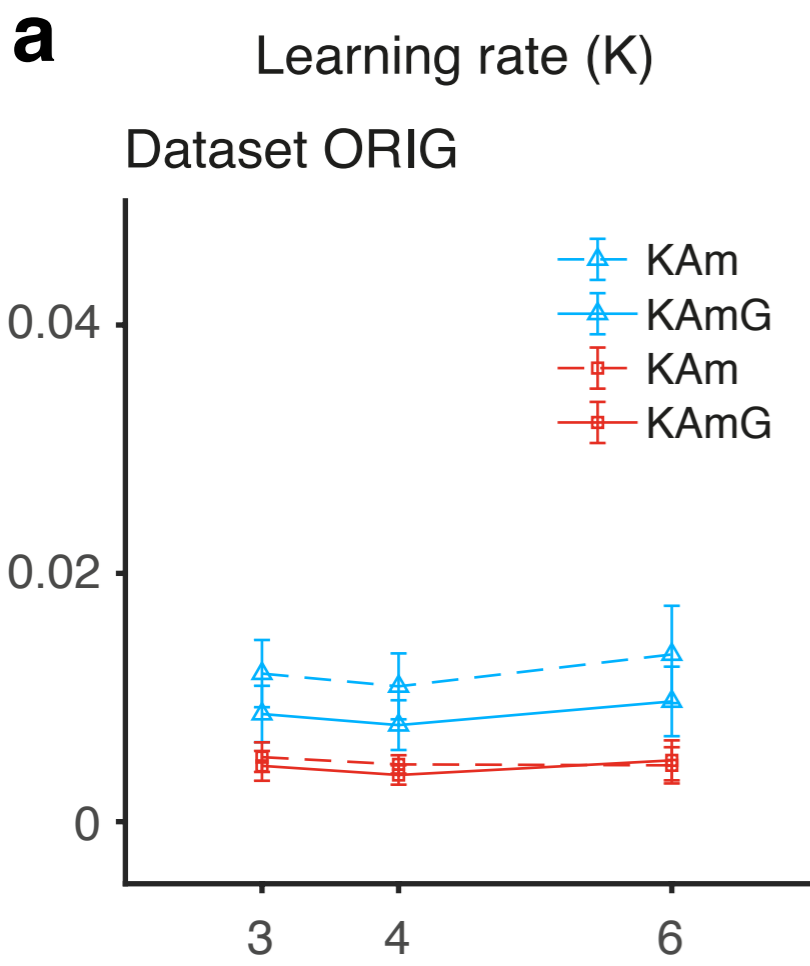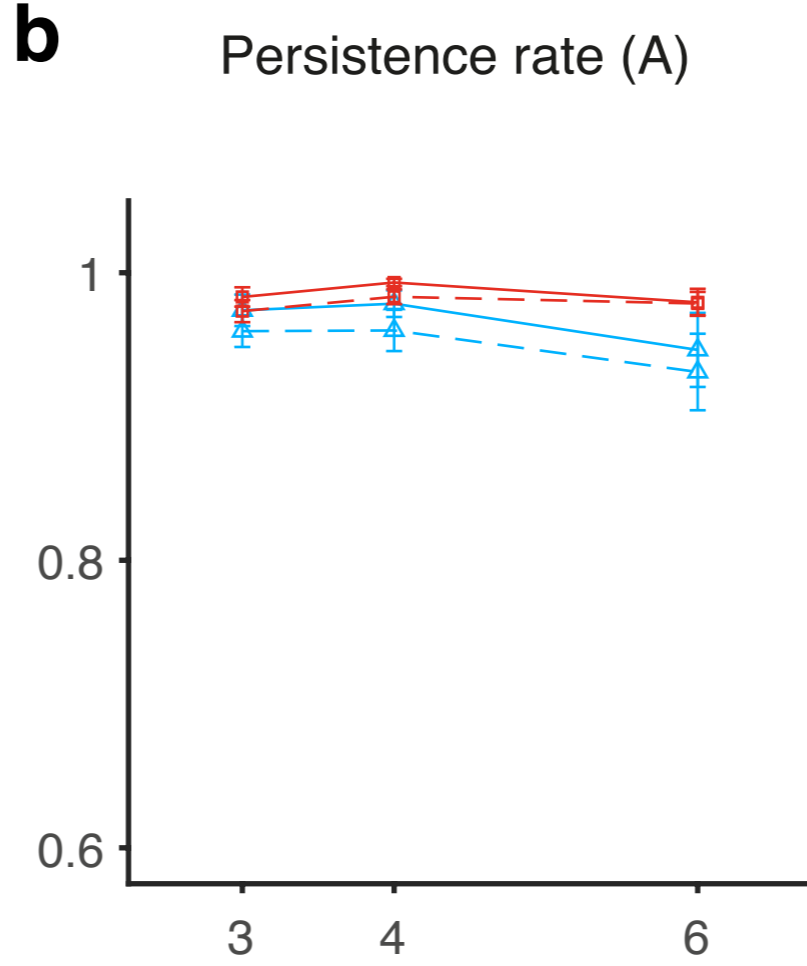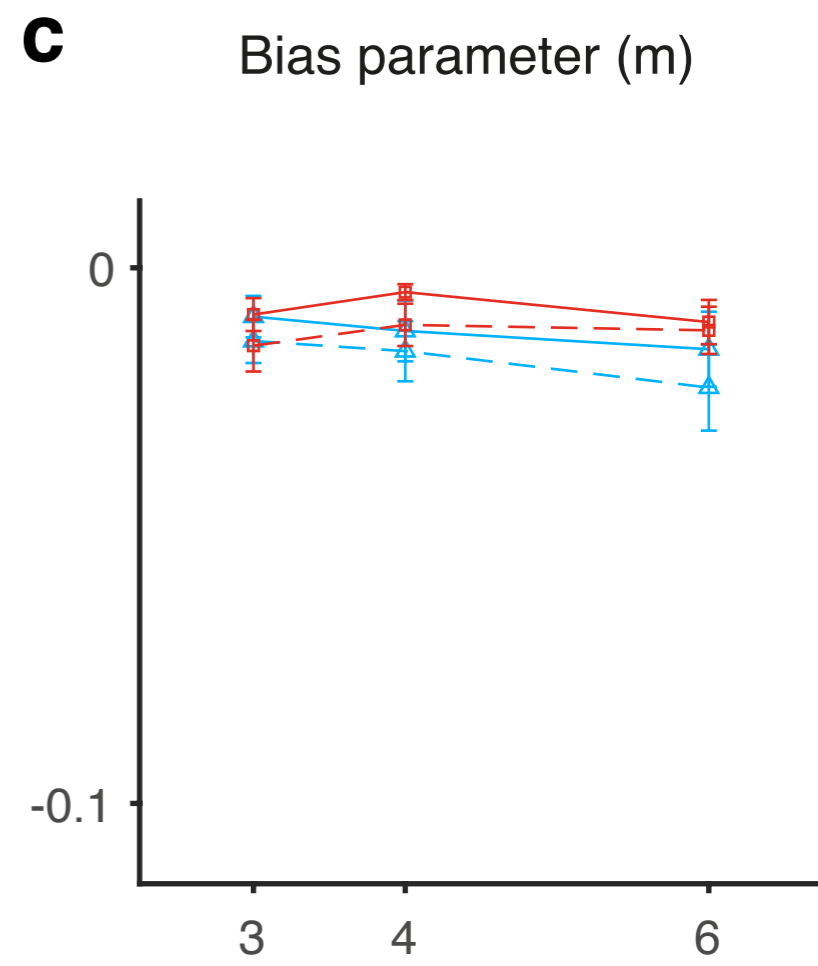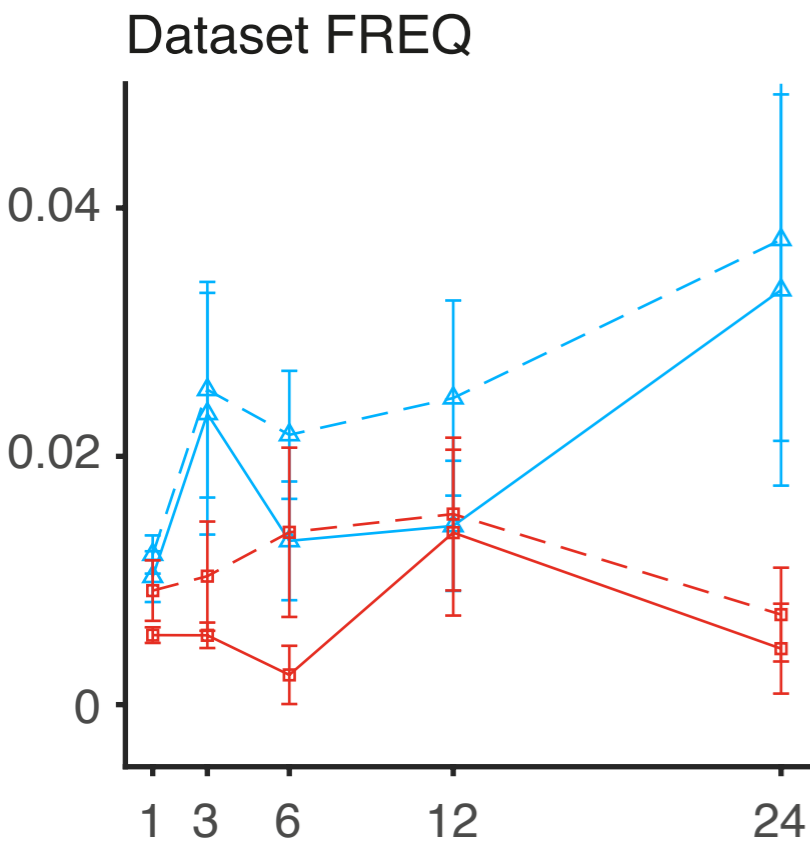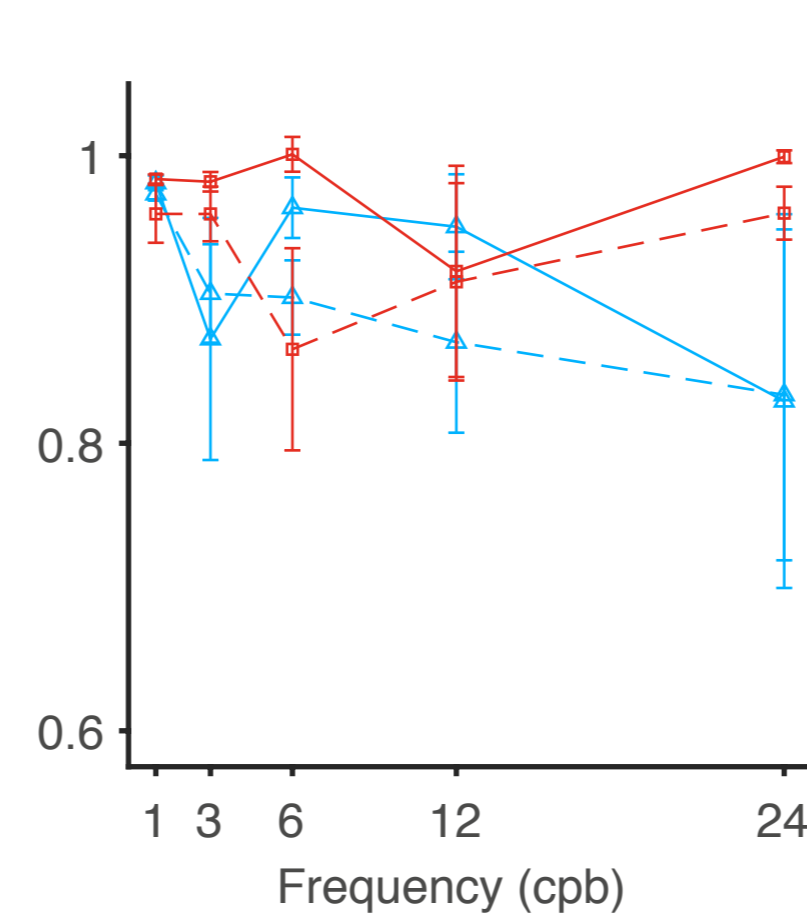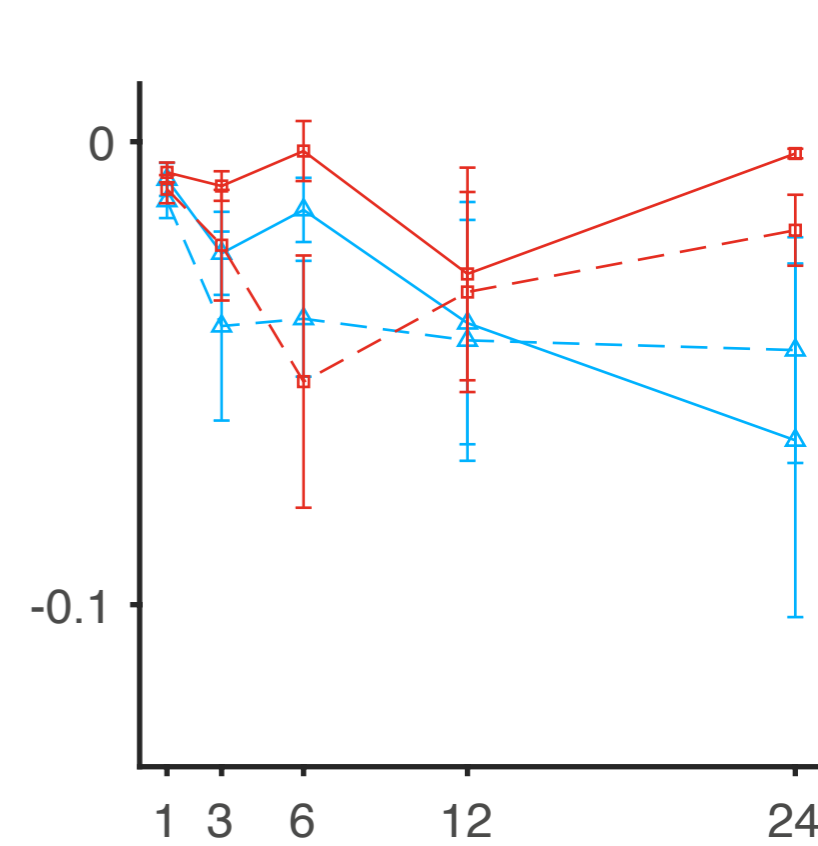

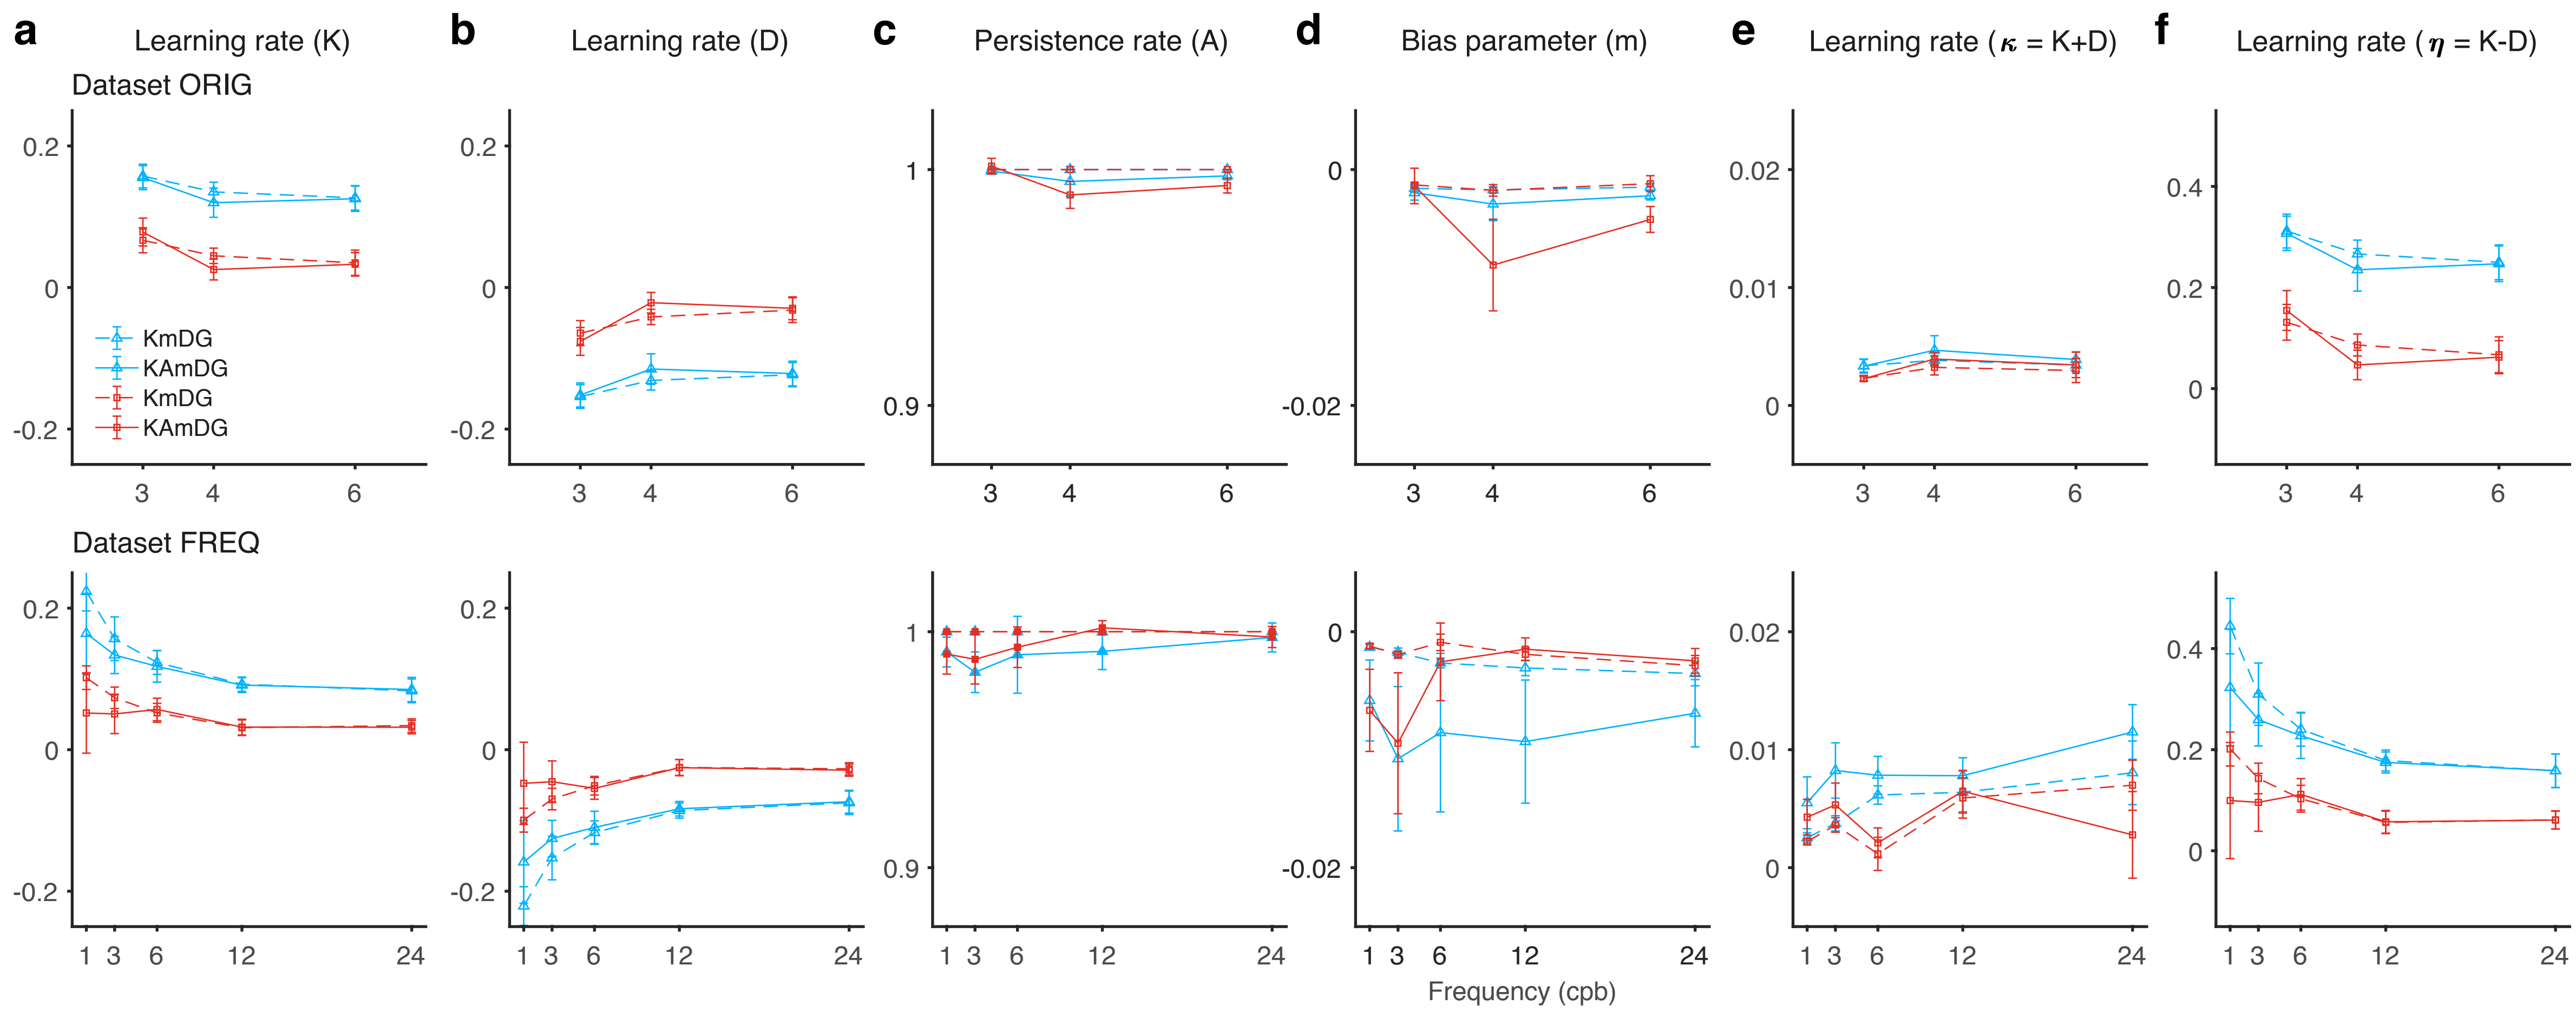

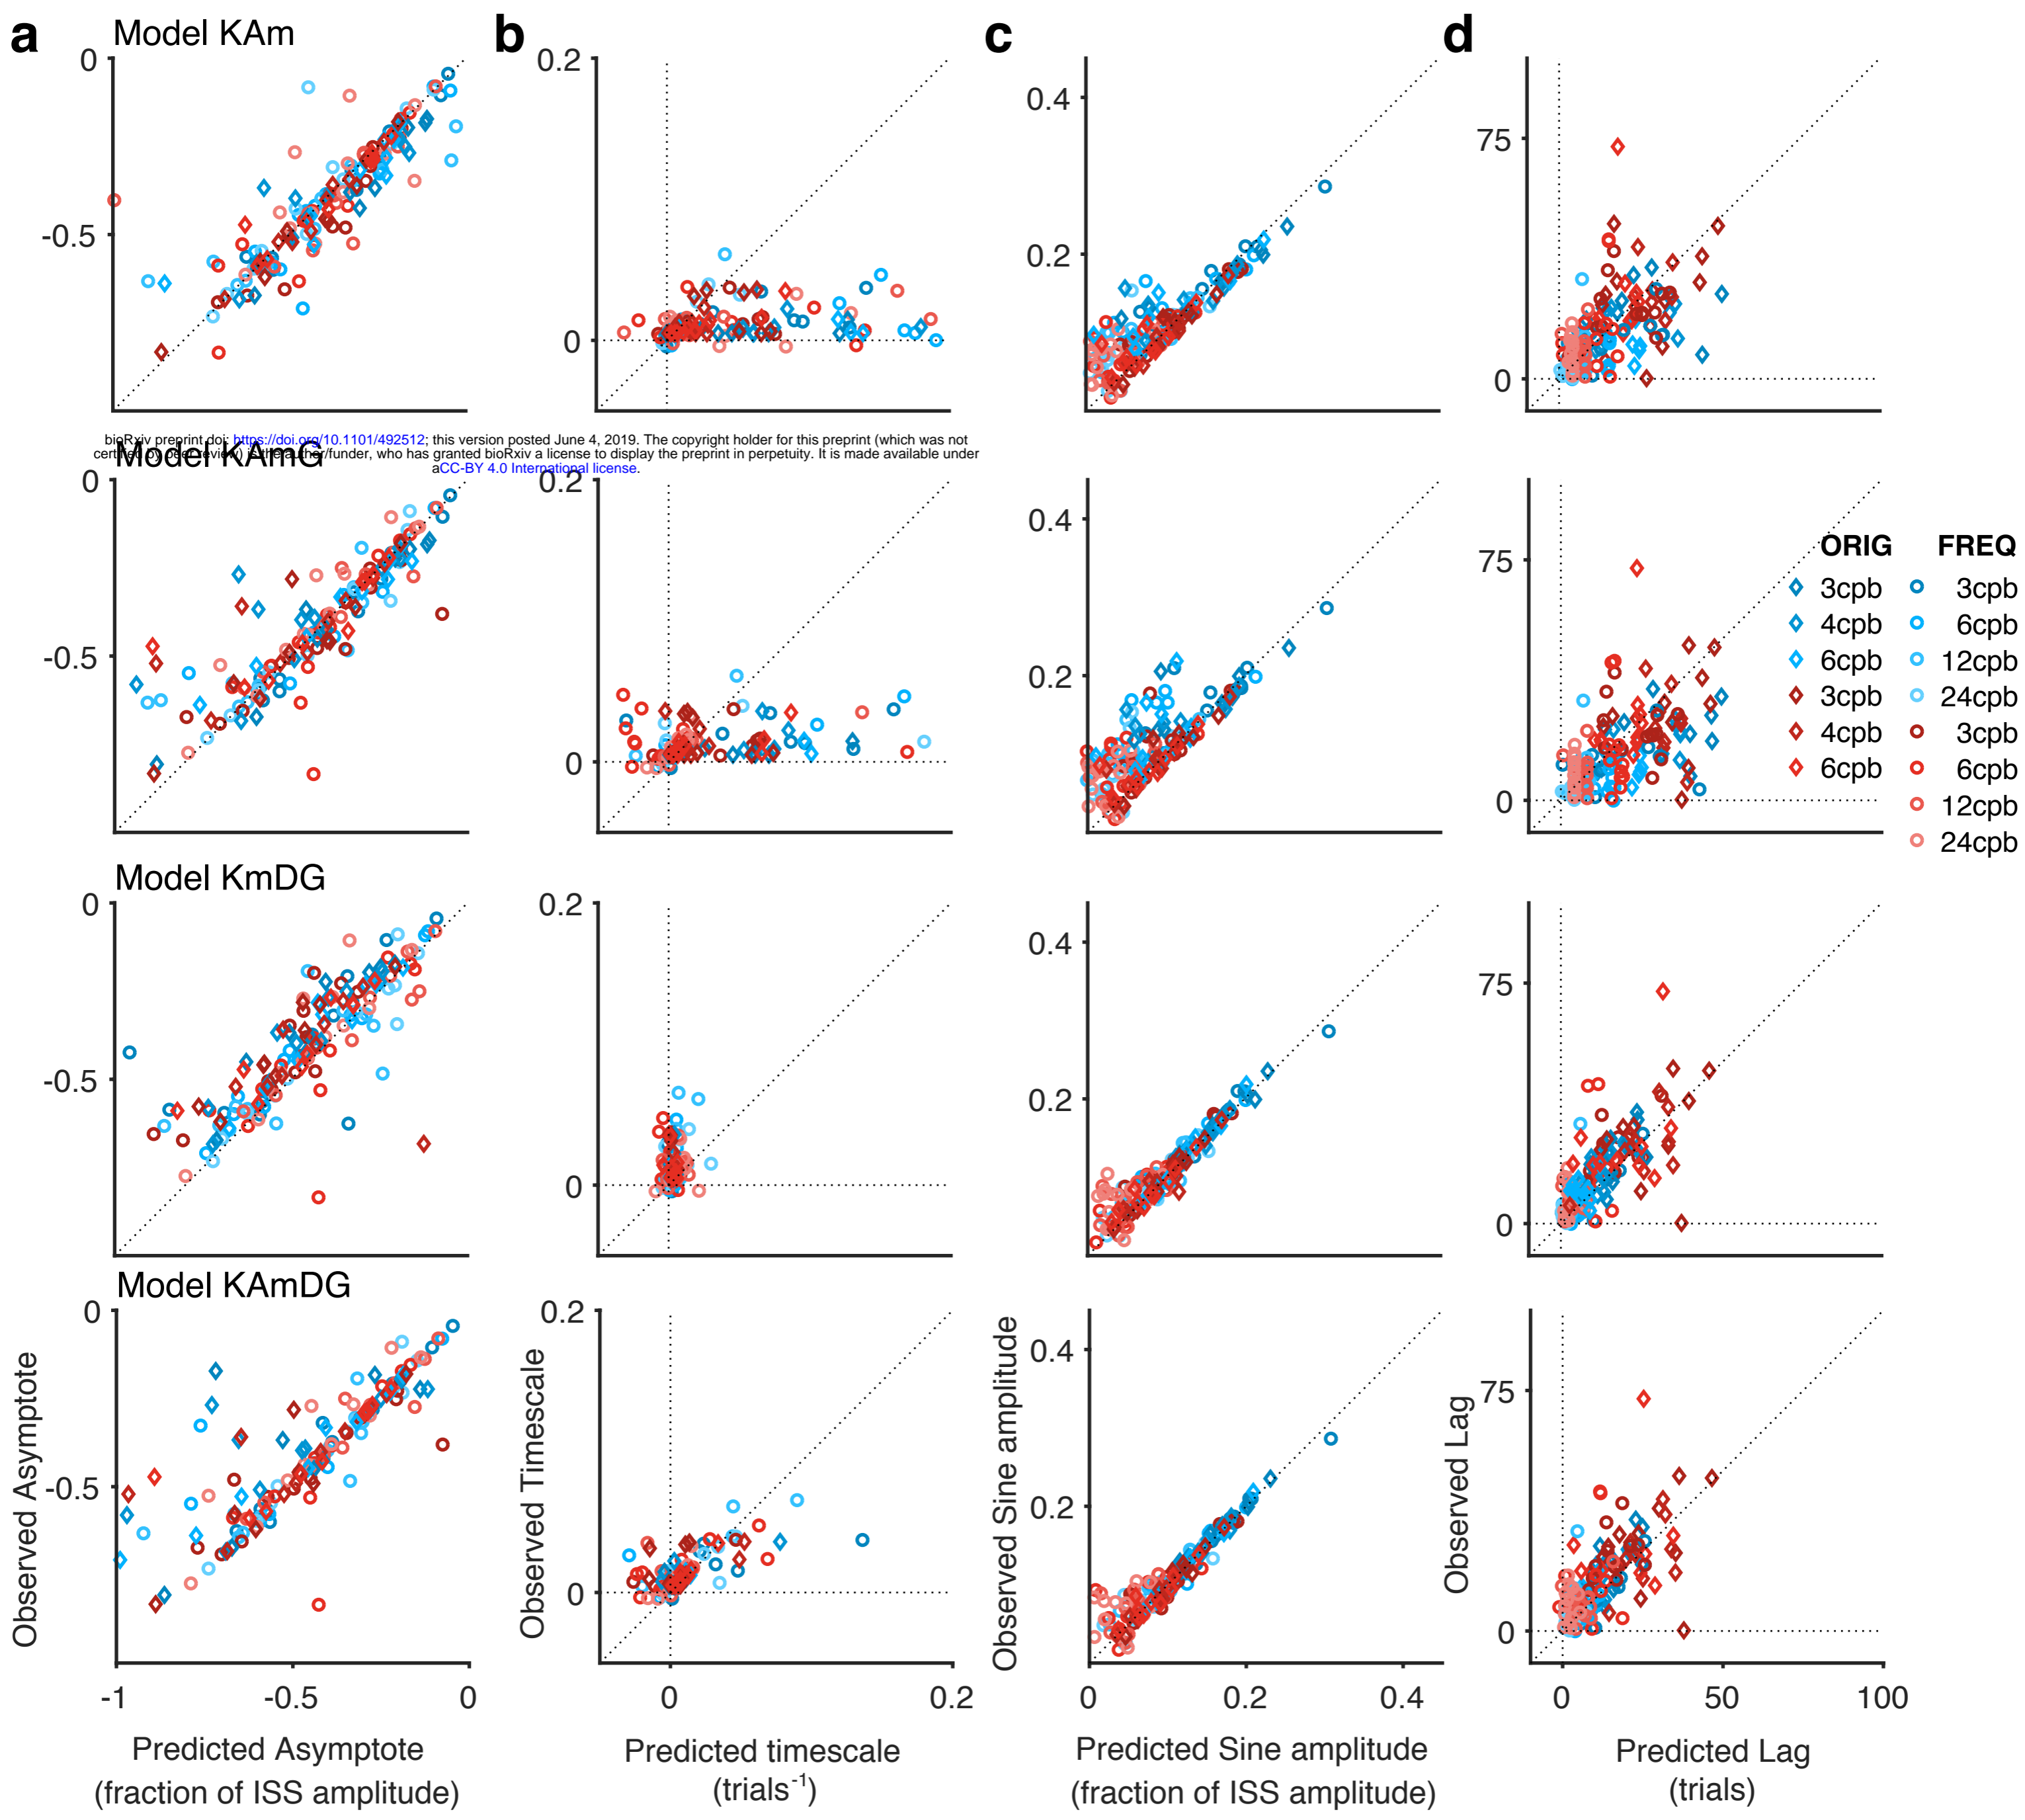

Source: https://www.biorxiv.org/content/10.1101/492512v2.full.pdf
